# Supplementary material
Source: publisher figshare collection journal article supplement (https://acs.figshare.com/ndownloader/files/4681807)
Supplement: Supplementary file 1 [file 4681807]

## Supporting Information for

### Extending Pummerer Reaction Chemistry. Synthesis Studies in the Phakellin Alkaloid Area.

Ken S. Feldman,\* Amanda P. Skoumbourdis and Matthew D. Fodor

Department of Chemistry, The Pennsylvania State University, University Park, PA 16802

<sup>1</sup>H NMR, <sup>13</sup>C NMR, IR, MS and HRMS for compounds **2a**, **22b**, **24b**, **27**, **33**, **34**, **35c**, **35g**, **35h**, **36a-i**, **37a-i**, **5-(3-Amino-propyl)-2-benzenesulfinyl-imidazole-1-sulfonic Acid Dimethylamide**, **4,5-Dibromo-1H-pyrrole-2-carboxylic Acid [3-(3-dimethylsulfamoyl-2-phenylsulfanyl-3H-imidazol-4-yl)-propyl]-amide**, **4,5-Dibromo-1H-pyrrole-2-carboxylic Acid [3-(2-benzenesulfinyl-3-dimethylsulfamoyl-3H-imidazol-4-yl)-propyl]-amide**

|                                                                               |     |
|-------------------------------------------------------------------------------|-----|
| <sup>1</sup> H NMR <b>2a</b>                                                  | S61 |
| <sup>13</sup> C NMR <b>2a</b>                                                 | S62 |
| <sup>1</sup> H NMR <b>2a</b> (decomposition in DMSO- <i>d</i> <sub>6</sub> )  | S63 |
| <sup>13</sup> C NMR <b>2a</b> (decomposition in DMSO- <i>d</i> <sub>6</sub> ) | S64 |
| <sup>1</sup> H NMR <b>22b</b>                                                 | S9  |
| <sup>13</sup> C NMR <b>22b</b>                                                | S10 |
| <sup>1</sup> H NMR <b>24b</b>                                                 | S55 |
| <sup>13</sup> C NMR <b>24b</b>                                                | S56 |
| <sup>1</sup> H NMR <b>27</b>                                                  | S57 |
| <sup>13</sup> C NMR <b>27</b>                                                 | S58 |
| <sup>1</sup> H NMR <b>33</b>                                                  | S59 |
| <sup>13</sup> C NMR <b>33</b>                                                 | S60 |
| <sup>1</sup> H NMR <b>34</b>                                                  | S11 |
| <sup>13</sup> C NMR <b>34</b>                                                 | S12 |
| <sup>1</sup> H NMR <b>35c</b>                                                 | S5  |
| <sup>13</sup> C NMR <b>35c</b>                                                | S6  |
| <sup>1</sup> H NMR <b>35g</b>                                                 | S3  |
| <sup>13</sup> C NMR <b>35g</b>                                                | S4  |
| <sup>1</sup> H NMR <b>35h</b>                                                 | S7  |
| <sup>13</sup> C NMR <b>35h</b>                                                | S8  |
| <sup>1</sup> H NMR <b>36a</b>                                                 | S15 |
| <sup>13</sup> C NMR <b>36a</b>                                                | S16 |
| <sup>1</sup> H NMR <b>36b</b>                                                 | S29 |
| <sup>13</sup> C NMR <b>36b</b>                                                | S30 |
| <sup>1</sup> H NMR <b>36c</b>                                                 | S33 |

|                                                                                                                                        |     |
|----------------------------------------------------------------------------------------------------------------------------------------|-----|
| <sup>13</sup> C NMR 36c                                                                                                                | S34 |
| <sup>1</sup> H NMR 36d                                                                                                                 | S23 |
| <sup>13</sup> C NMR 36d                                                                                                                | S24 |
| <sup>1</sup> H NMR 36e                                                                                                                 | S17 |
| <sup>13</sup> C NMR 36e                                                                                                                | S18 |
| <sup>1</sup> H NMR 36f                                                                                                                 | S25 |
| <sup>13</sup> C NMR 36f                                                                                                                | S26 |
| <sup>1</sup> H NMR 36g                                                                                                                 | S31 |
| <sup>13</sup> C NMR 36g                                                                                                                | S32 |
| <sup>1</sup> H NMR 36h                                                                                                                 | S35 |
| <sup>13</sup> C NMR 36h                                                                                                                | S36 |
| <sup>1</sup> H NMR 36i                                                                                                                 | S27 |
| <sup>13</sup> C NMR 36i                                                                                                                | S28 |
| <sup>1</sup> H NMR 37a                                                                                                                 | S37 |
| <sup>13</sup> C NMR 37a                                                                                                                | S38 |
| <sup>1</sup> H NMR 37b                                                                                                                 | S47 |
| <sup>13</sup> C NMR 37b                                                                                                                | S48 |
| <sup>1</sup> H NMR 37c                                                                                                                 | S51 |
| <sup>13</sup> C NMR 37c                                                                                                                | S52 |
| <sup>1</sup> H NMR 37d                                                                                                                 | S41 |
| <sup>13</sup> C NMR 37d                                                                                                                | S42 |
| <sup>1</sup> H NMR 37e                                                                                                                 | S39 |
| <sup>13</sup> C NMR 37e                                                                                                                | S40 |
| <sup>1</sup> H NMR 37f                                                                                                                 | S43 |
| <sup>13</sup> C NMR 37f                                                                                                                | S44 |
| <sup>1</sup> H NMR 37g                                                                                                                 | S49 |
| <sup>13</sup> C NMR 37g                                                                                                                | S50 |
| <sup>1</sup> H NMR 37h                                                                                                                 | S53 |
| <sup>13</sup> C NMR 37h                                                                                                                | S54 |
| <sup>1</sup> H NMR 37i                                                                                                                 | S45 |
| <sup>13</sup> C NMR 37i                                                                                                                | S46 |
| <sup>1</sup> H NMR 5-(3-Amino-propyl)-2-benzenesulfinyl-imidazole-1-sulfonic Acid<br>Dimethylamide                                     | S13 |
| <sup>13</sup> C NMR 5-(3-Amino-propyl)-2-benzenesulfinyl-imidazole-1-sulfonic Acid<br>Dimethylamide                                    | S14 |
| <sup>1</sup> H NMR 4,5-Dibromo-1H-pyrrole-2-carboxylic Acid [3-(3-dimethylsulfamoyl-2-phenylsulfanyl-3H-imidazol-4-yl)-propyl]-amide   | S19 |
| <sup>13</sup> C NMR 4,5-Dibromo-1H-pyrrole-2-carboxylic Acid [3-(3-dimethylsulfamoyl-2-phenylsulfanyl-3H-imidazol-4-yl)-propyl]-amide  | S20 |
| <sup>1</sup> H NMR 4,5-Dibromo-1H-pyrrole-2-carboxylic Acid [3-(2-benzenesulfinyl-3-dimethylsulfamoyl-3H-imidazol-4-yl)-propyl]-amide  | S21 |
| <sup>13</sup> C NMR 4,5-Dibromo-1H-pyrrole-2-carboxylic Acid [3-(2-benzenesulfinyl-3-dimethylsulfamoyl-3H-imidazol-4-yl)-propyl]-amide | S22 |
| General Experimental Procedures                                                                                                        | S65 |

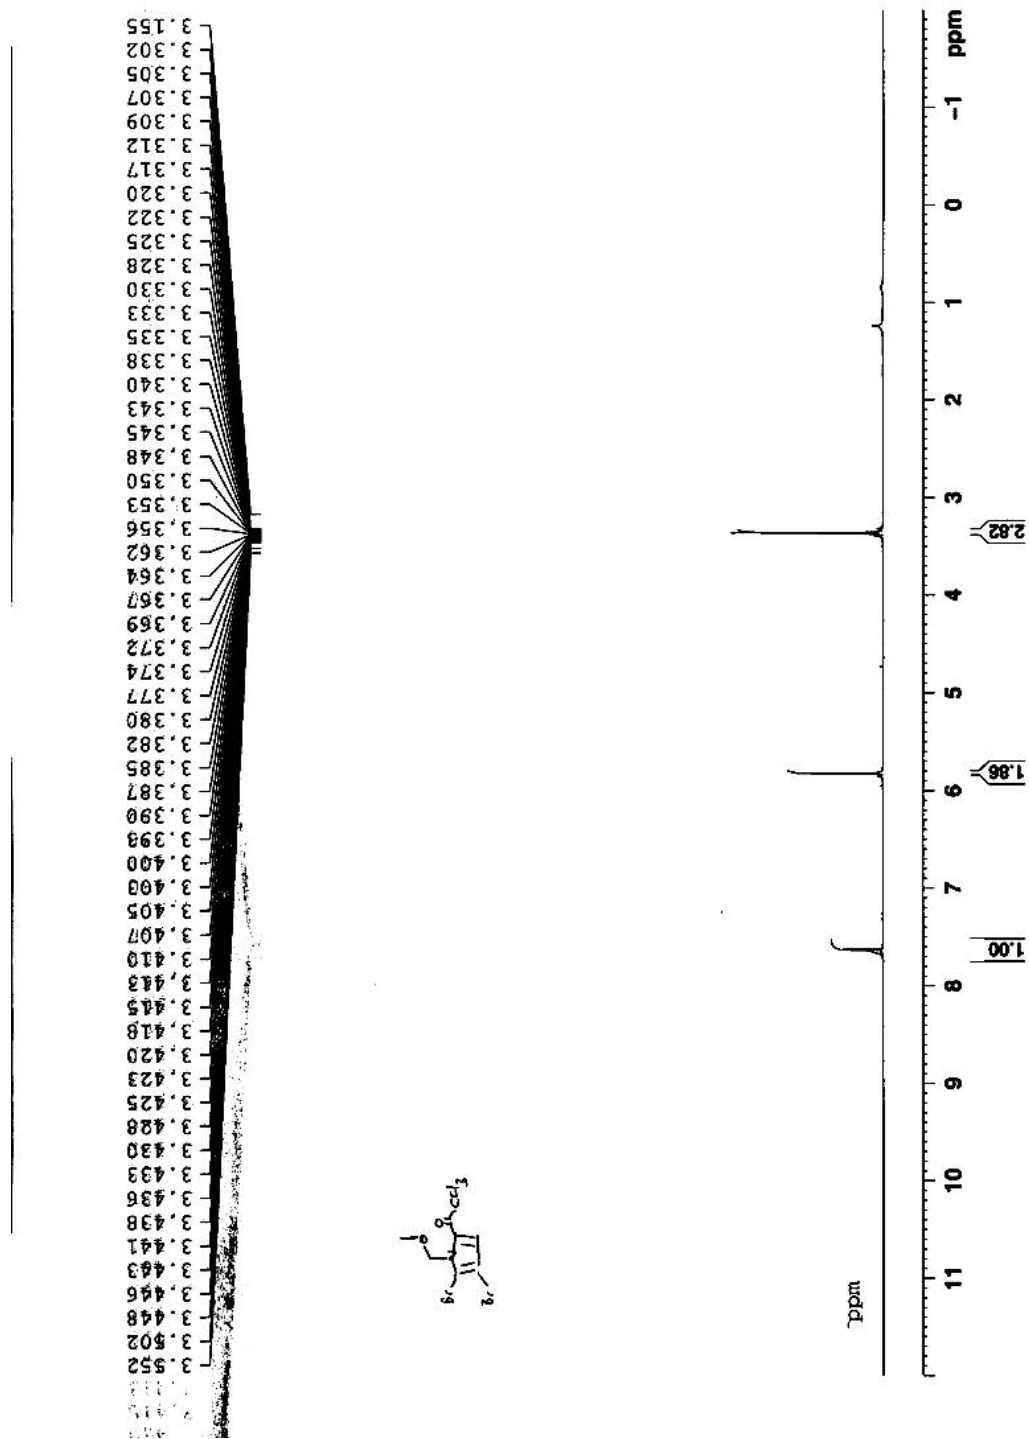

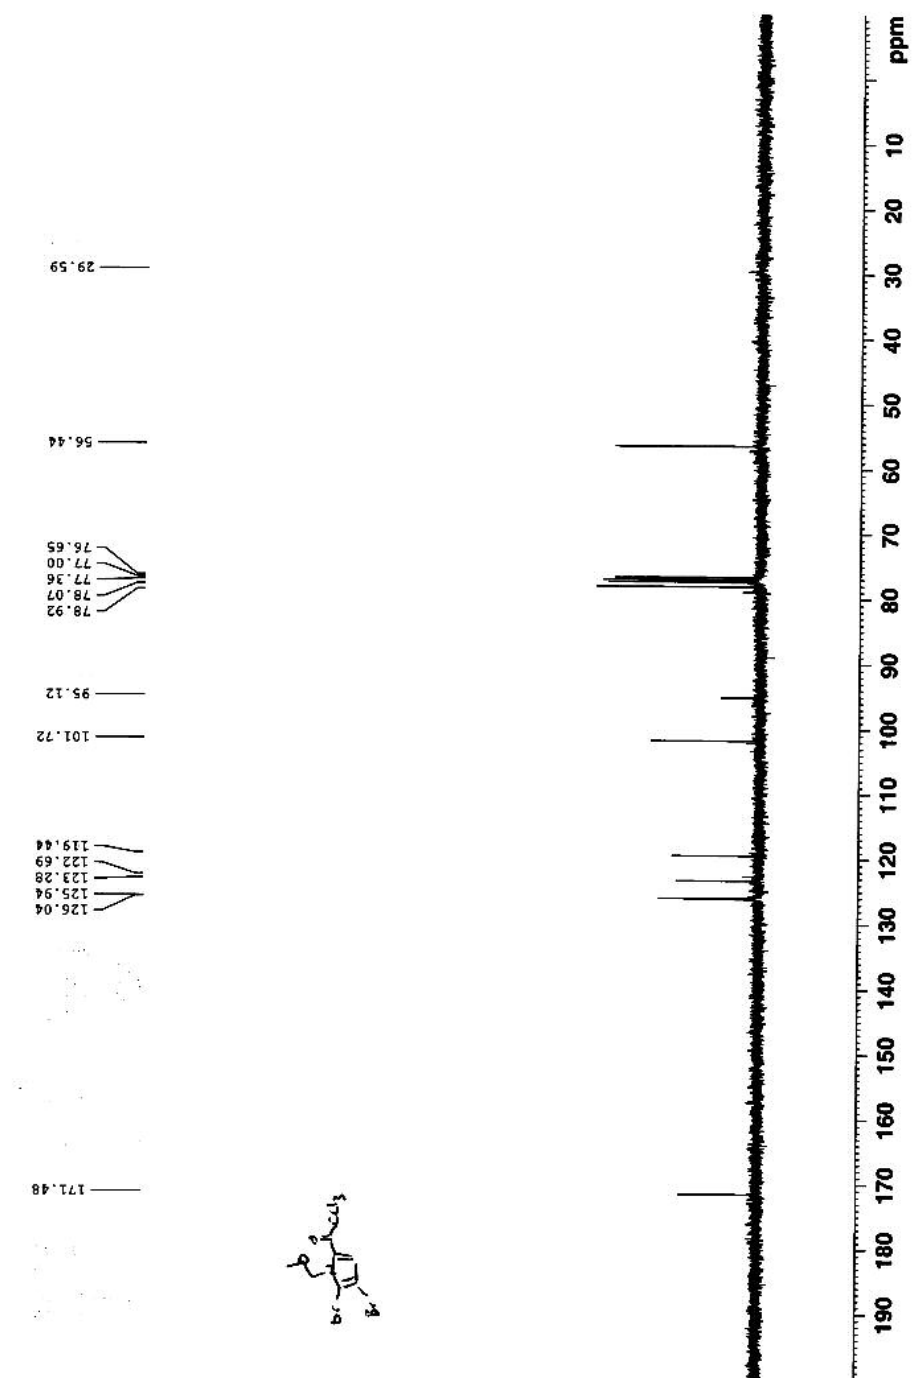

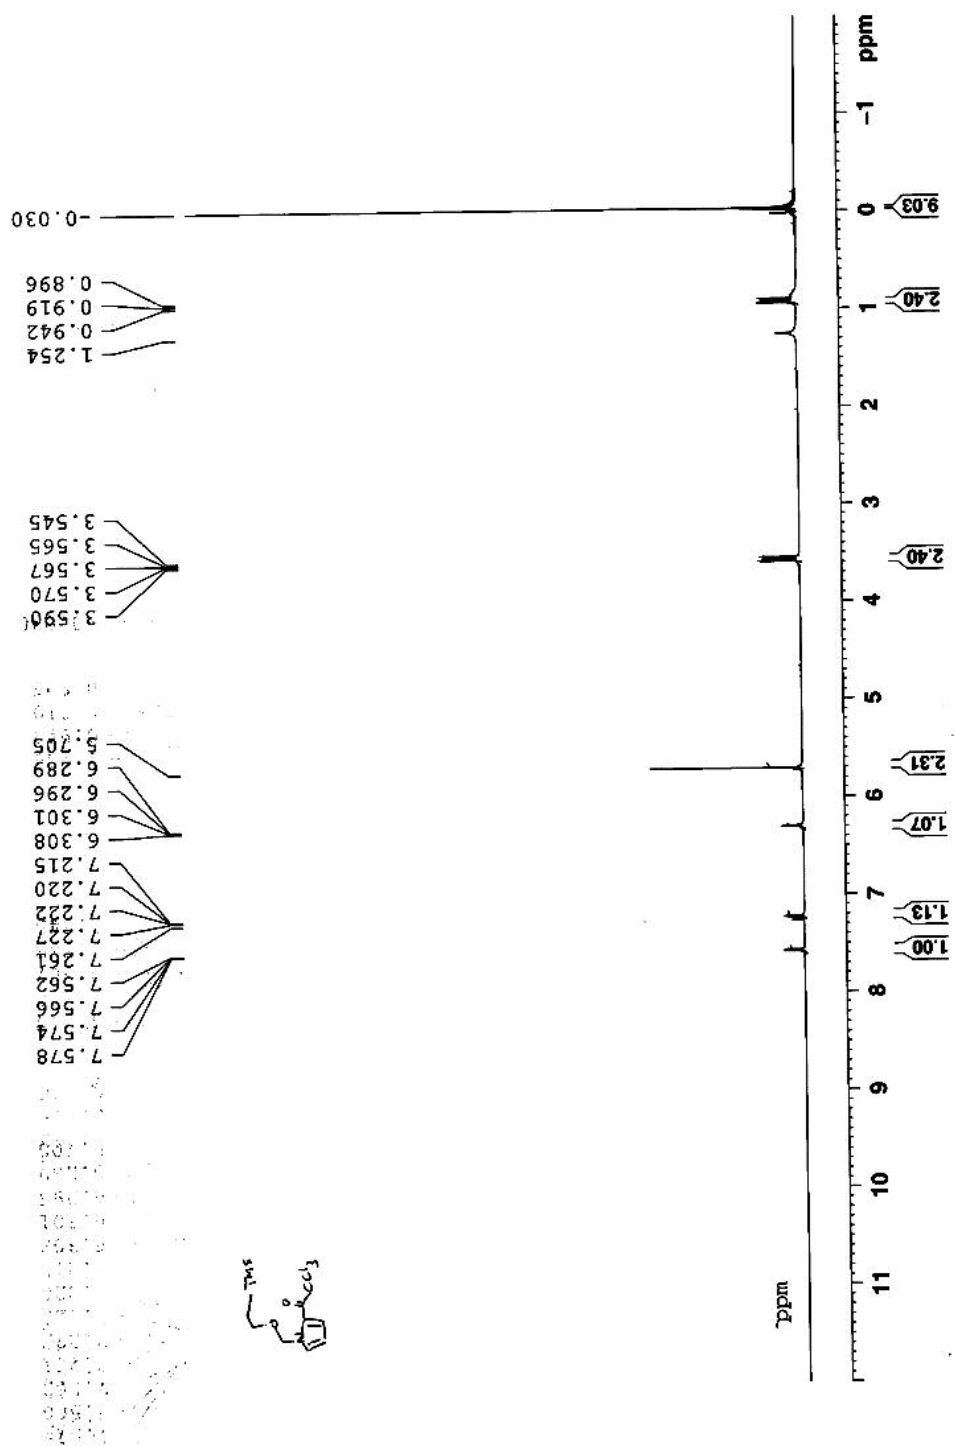

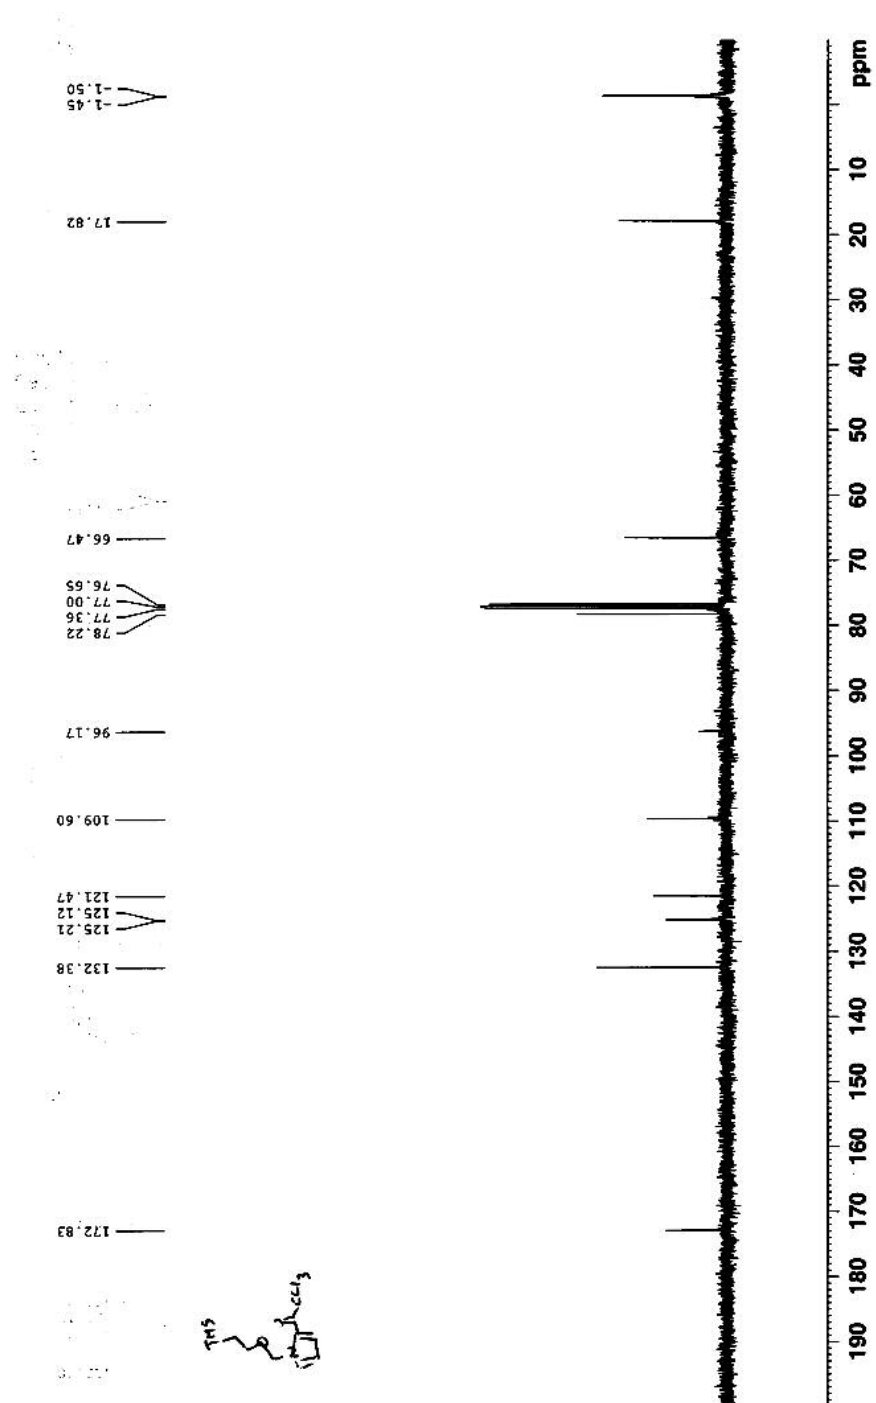

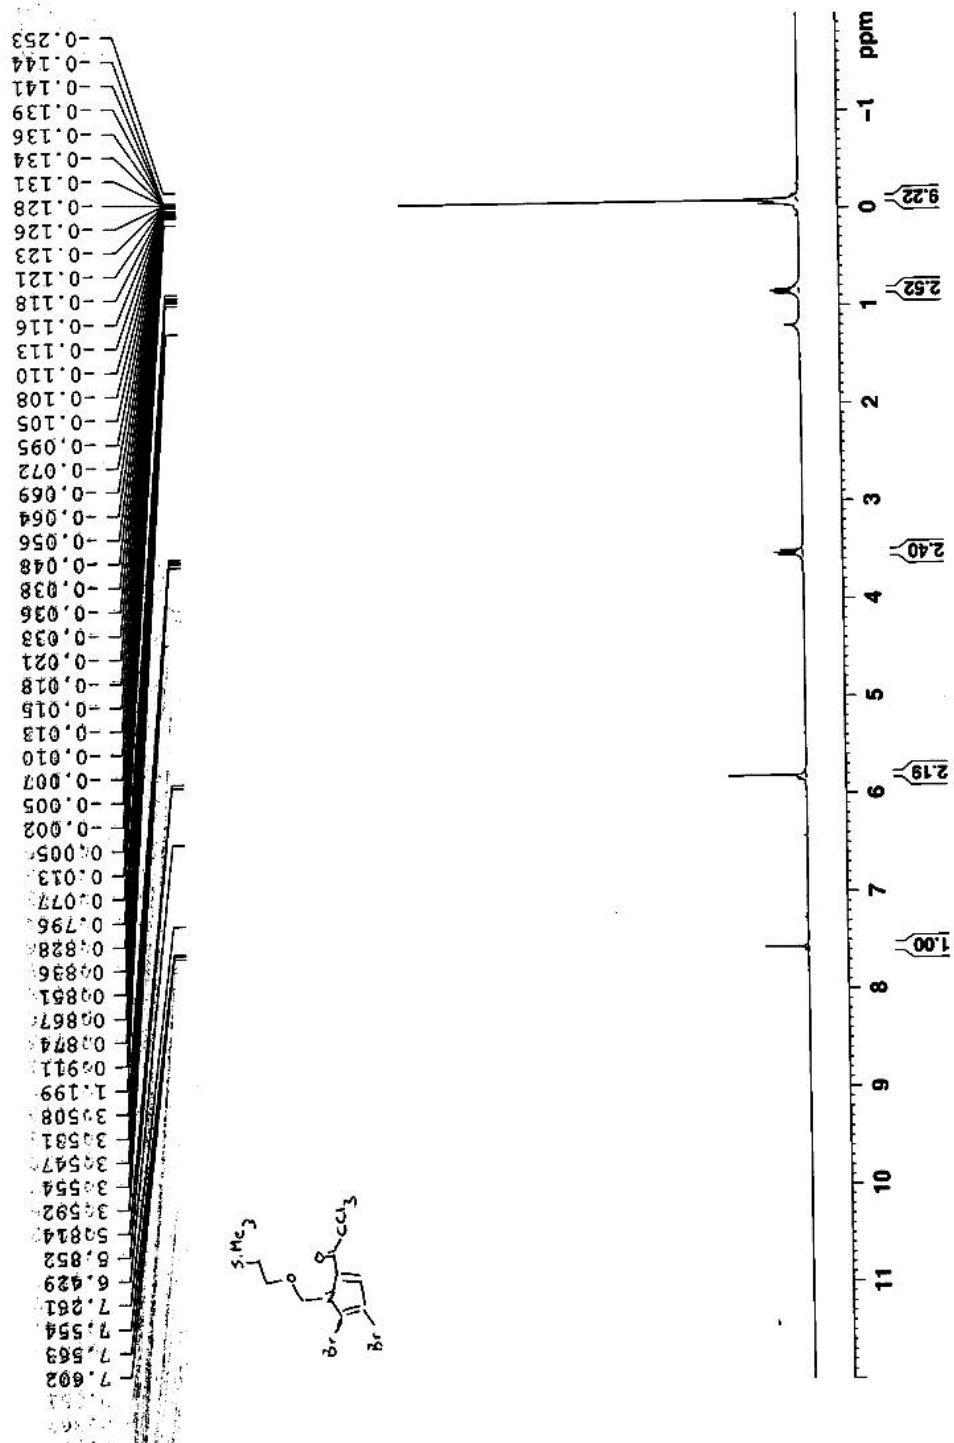

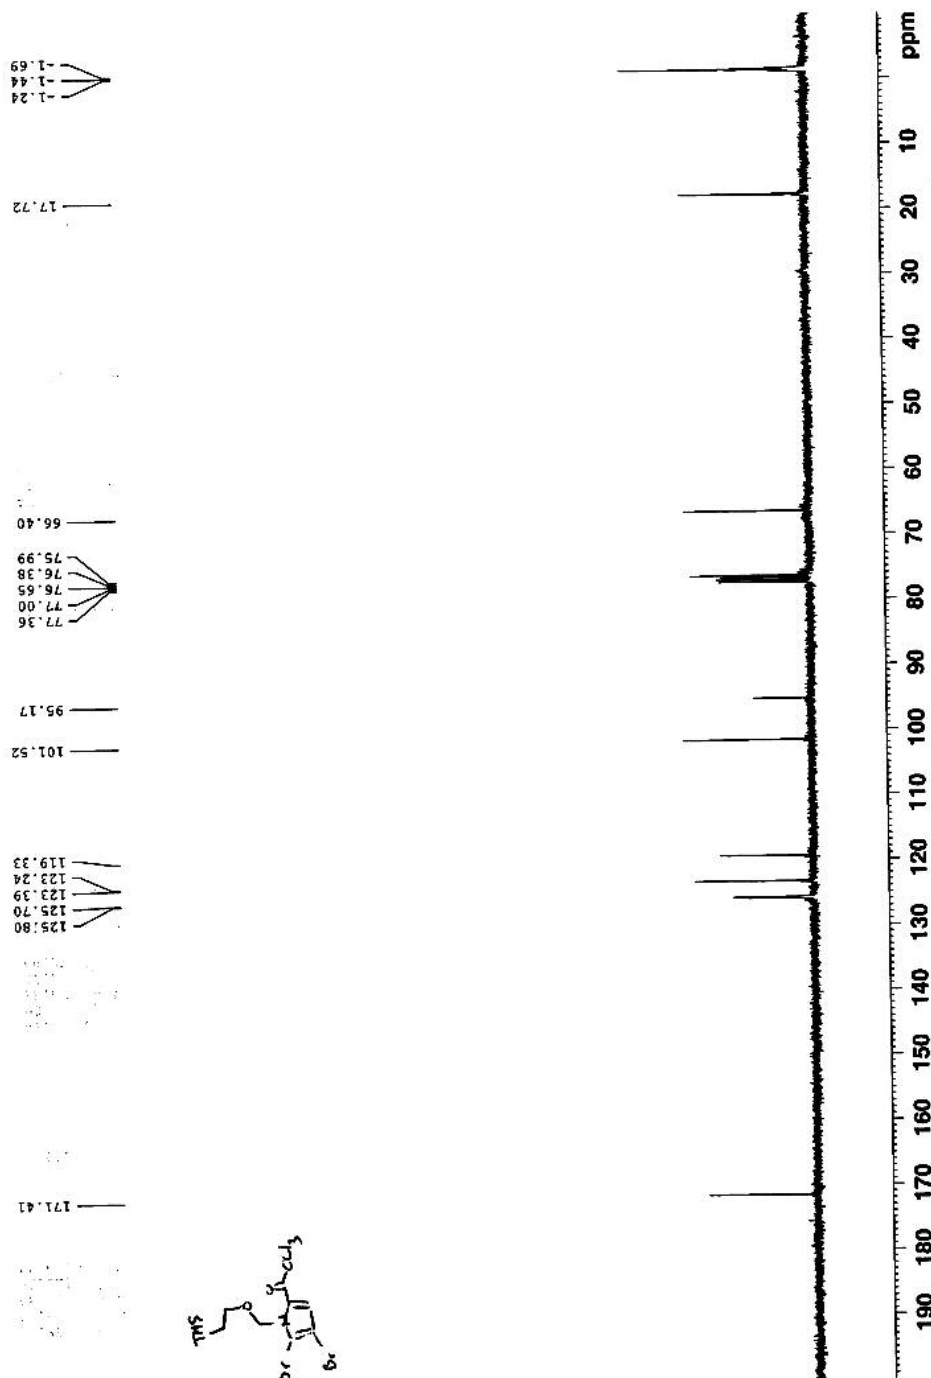



mdf-02-130 phthalimide - sulfoxide - 300MHz

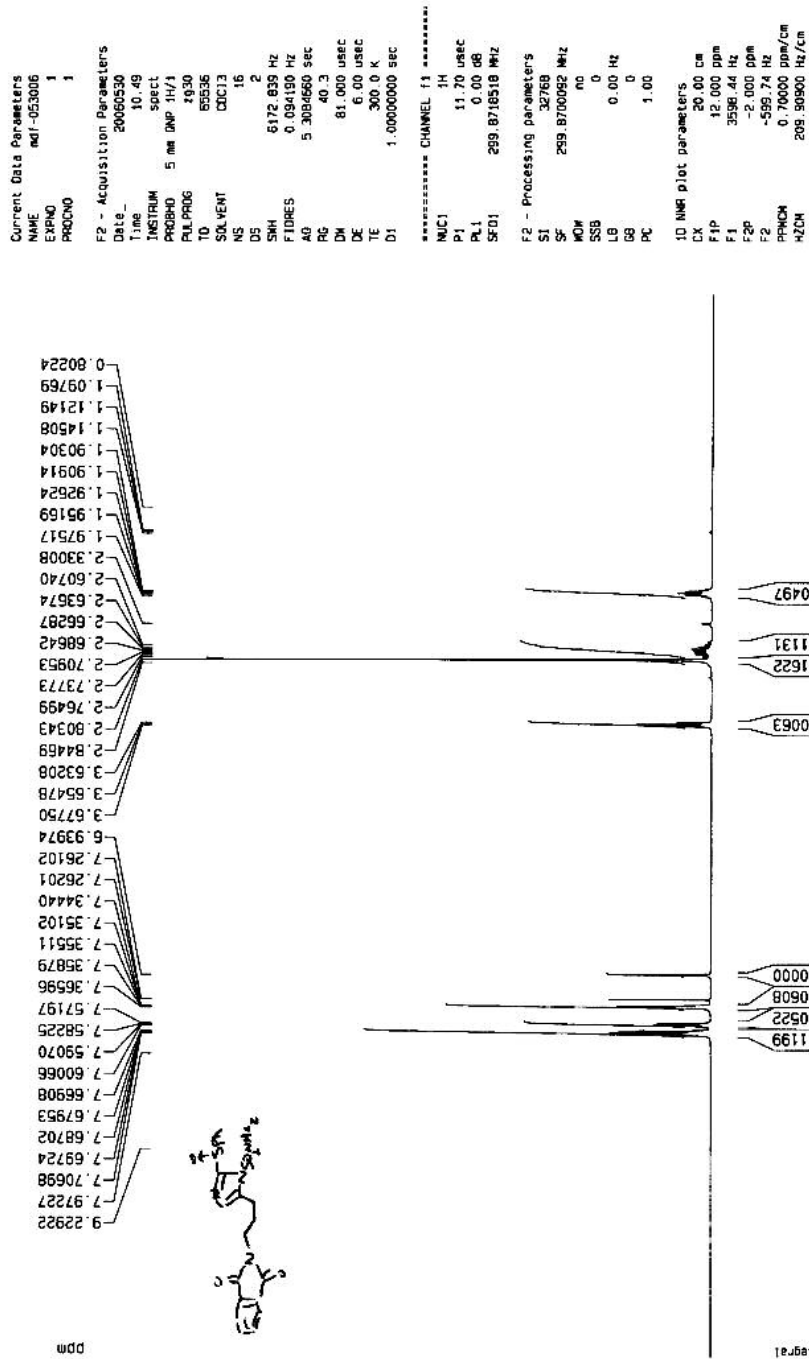

mdf-02-130 phthalimide - sulfoxide - 75 MHz

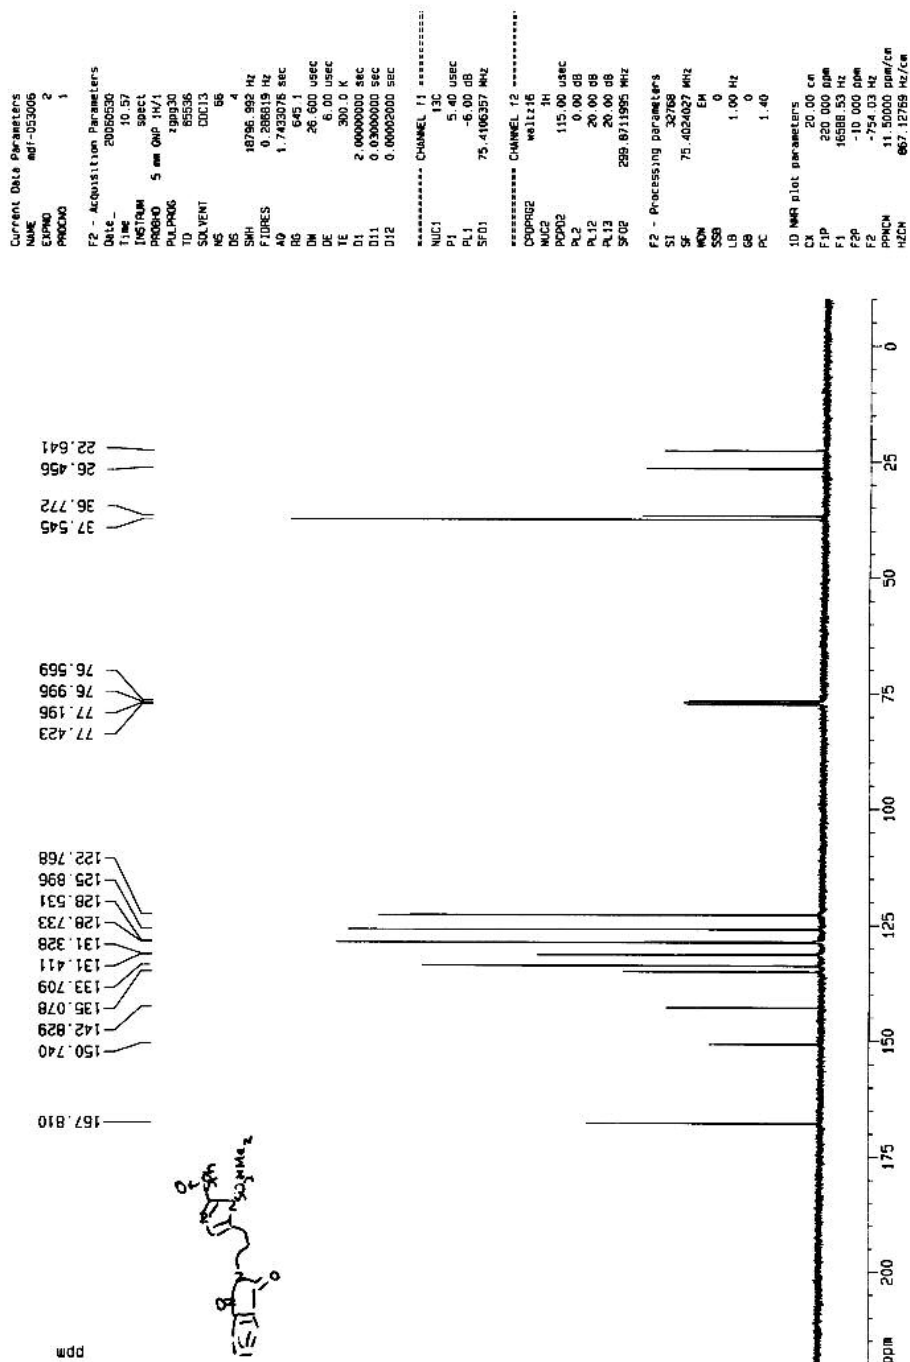

mdf-02-237 protected aminosulfide - 400MHz

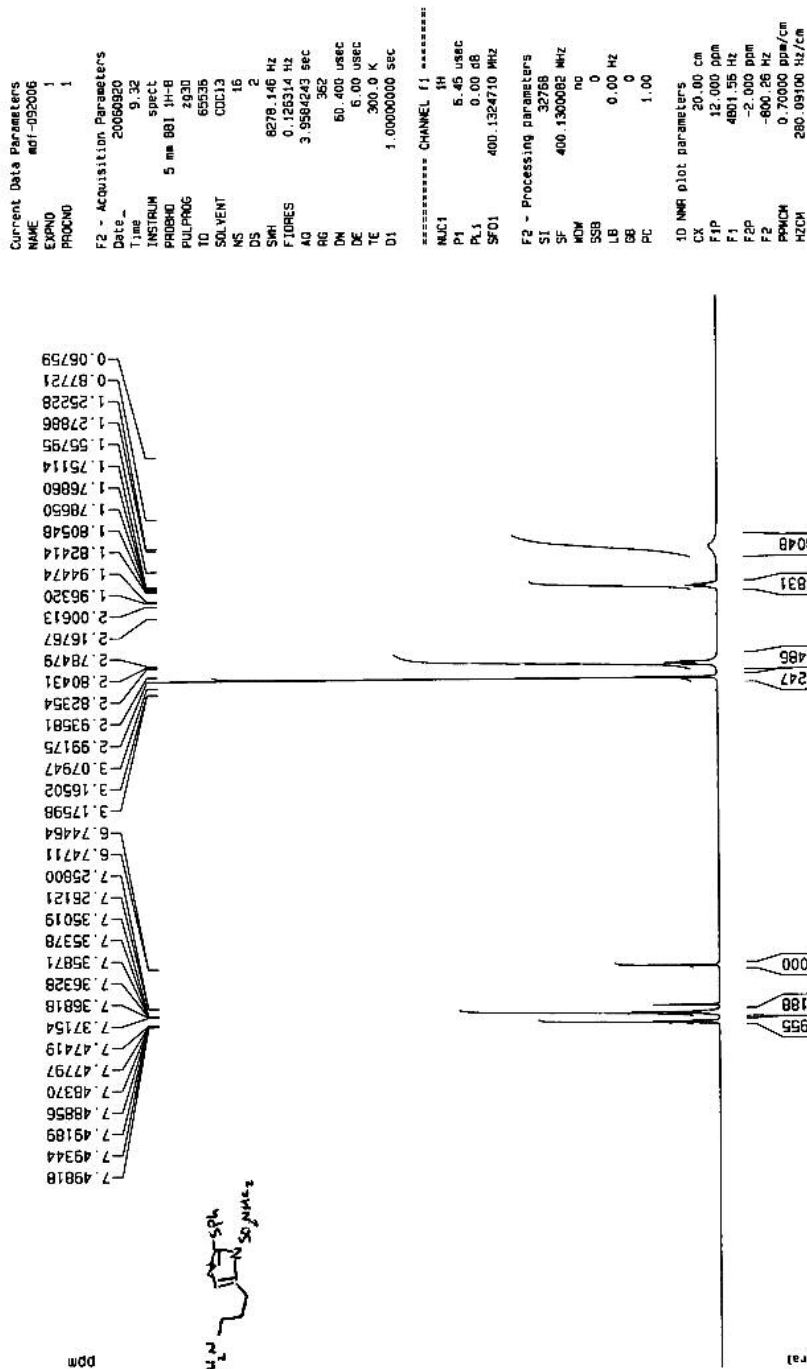

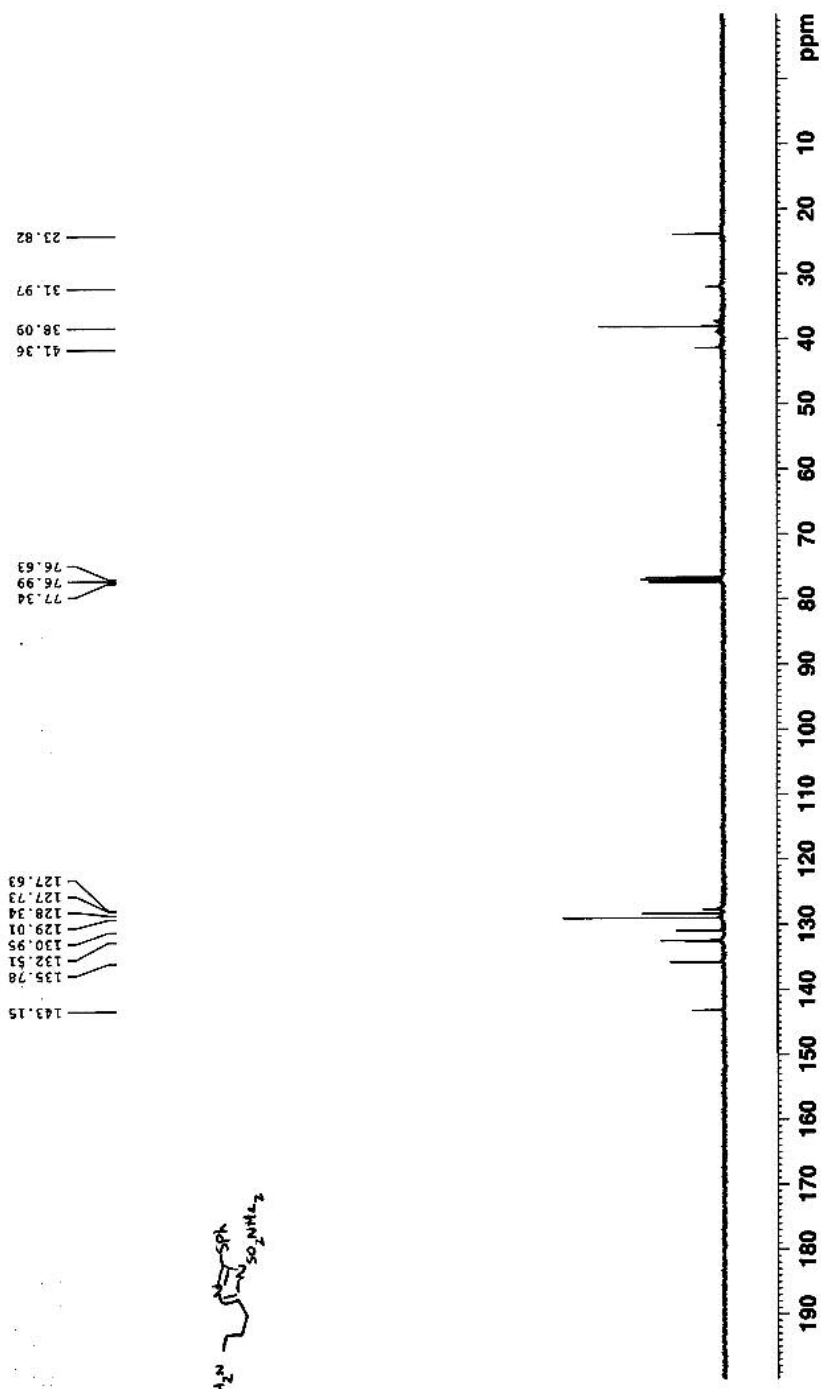

mdf-02-13: amine - sulfoxide - 300MHz

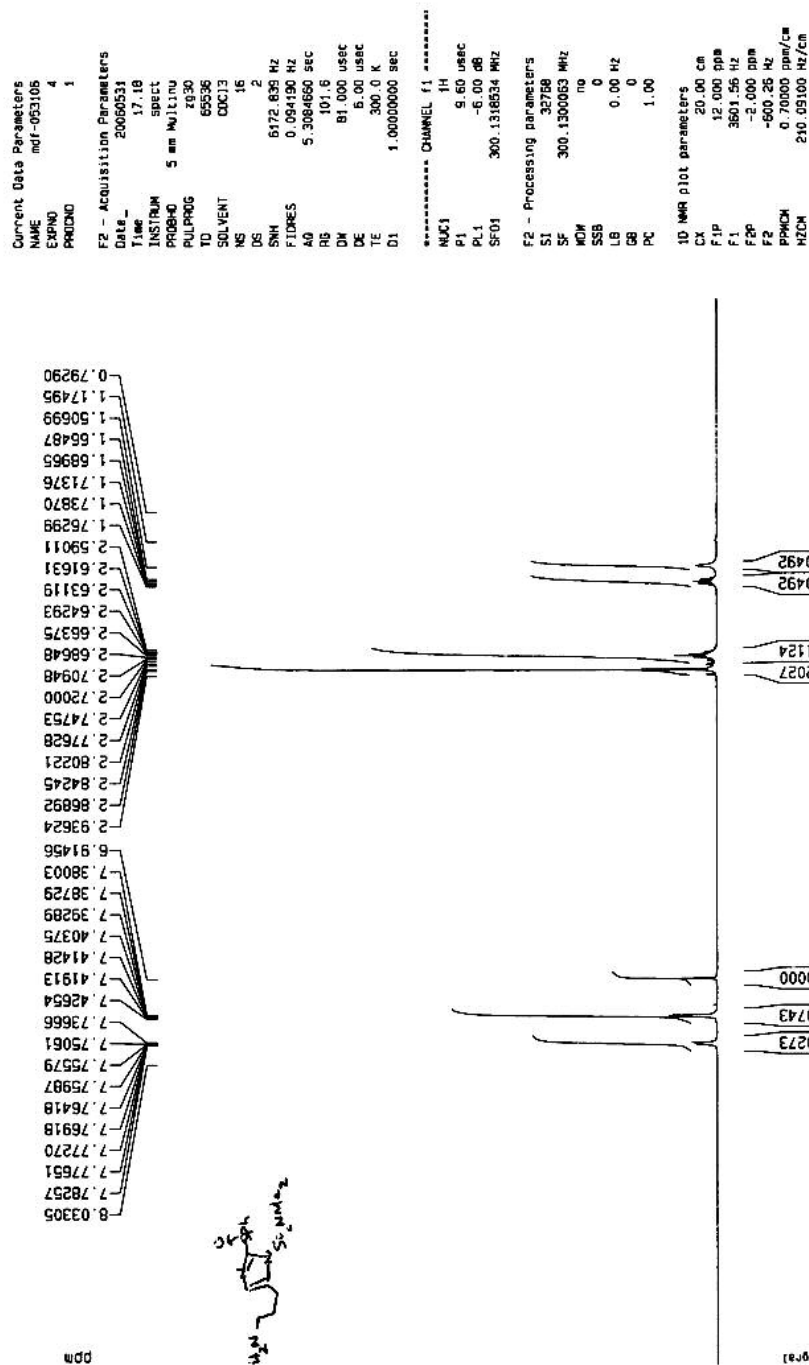

mdf-02-131 amine - sulfoxide - 75MHz

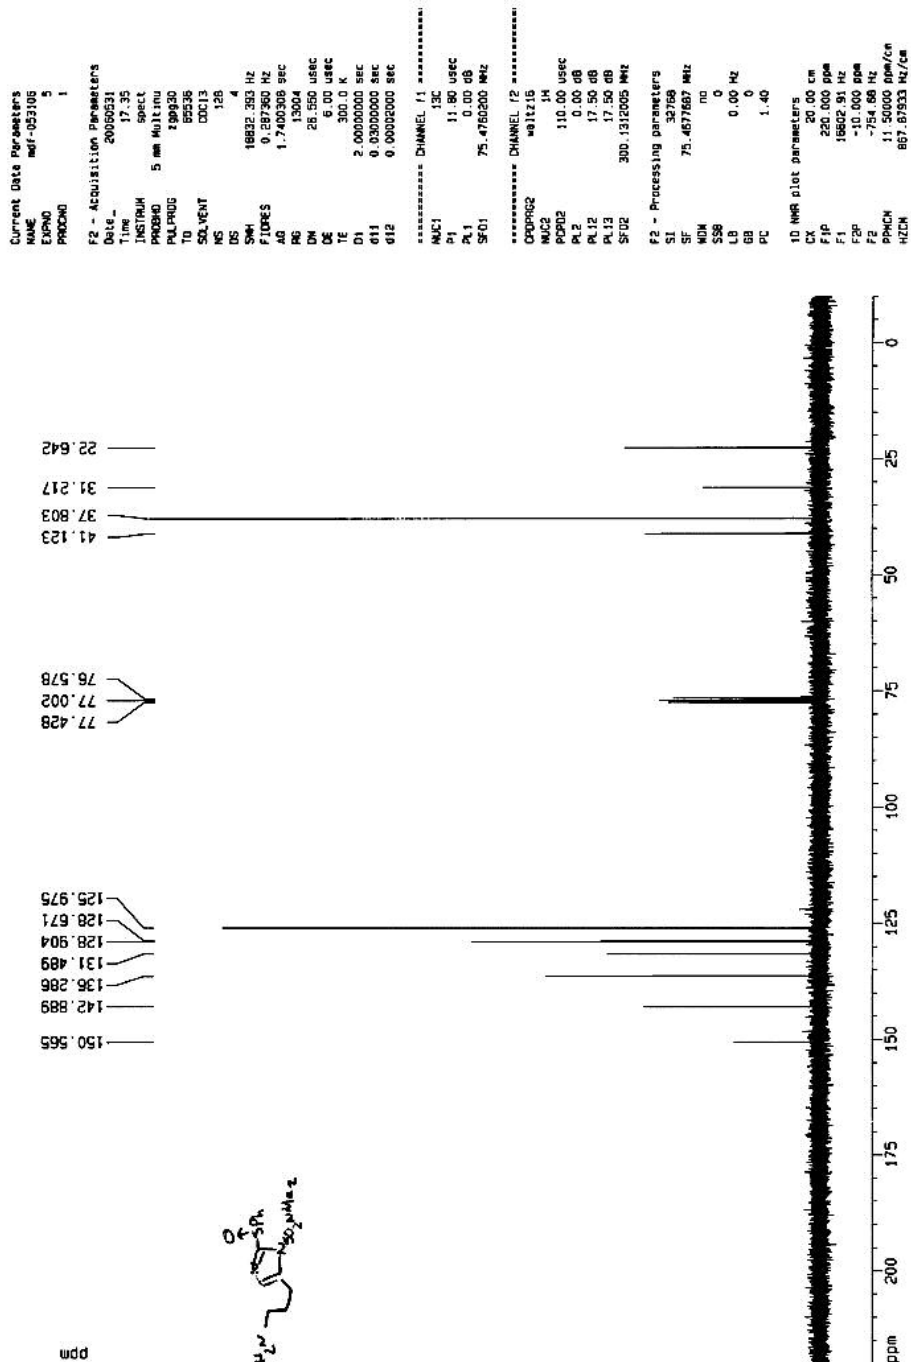

Current Data Parameters  
NAME md1-051707  
EXPNO 5  
PROCNO 1

F2 - Acquisition Parameters  
Date\_ 20070517  
Time 12.41  
INSTRUM spect  
PROBHD 5 mm QNP 1H/1  
PULPROG zgpg30  
TD 65536  
SOLVENT DMS  
NS 20  
DS 0  
SWH 6172.839 Hz  
FIDRES 0.376760 Hz  
AQ 1.3271540 sec  
RG 362  
DM 81.000 usec  
DE 6.00 usec  
TE 300.0 K  
D1 1.0000000 sec

===== CHANNEL f1 =====  
NUC1 1H  
P1 11.70 usec  
PL1 0.00 dB  
SFO1 299.8718518 MHz

F2 - Processing parameters  
SI 32768  
SF 299.870096 MHz  
WDW no  
SSB 0  
LB 0.00 Hz  
GB 0  
PC 1.00

1D NMR plot parameters  
CX 20.00 cm  
FIP 12.000 ppm  
F1 3998.44 Hz  
F2 -2.000 ppm  
F2 -599.74 Hz  
PPMCH 0.70000 ppm/cm  
HZCM 209.90900 Hz/cm

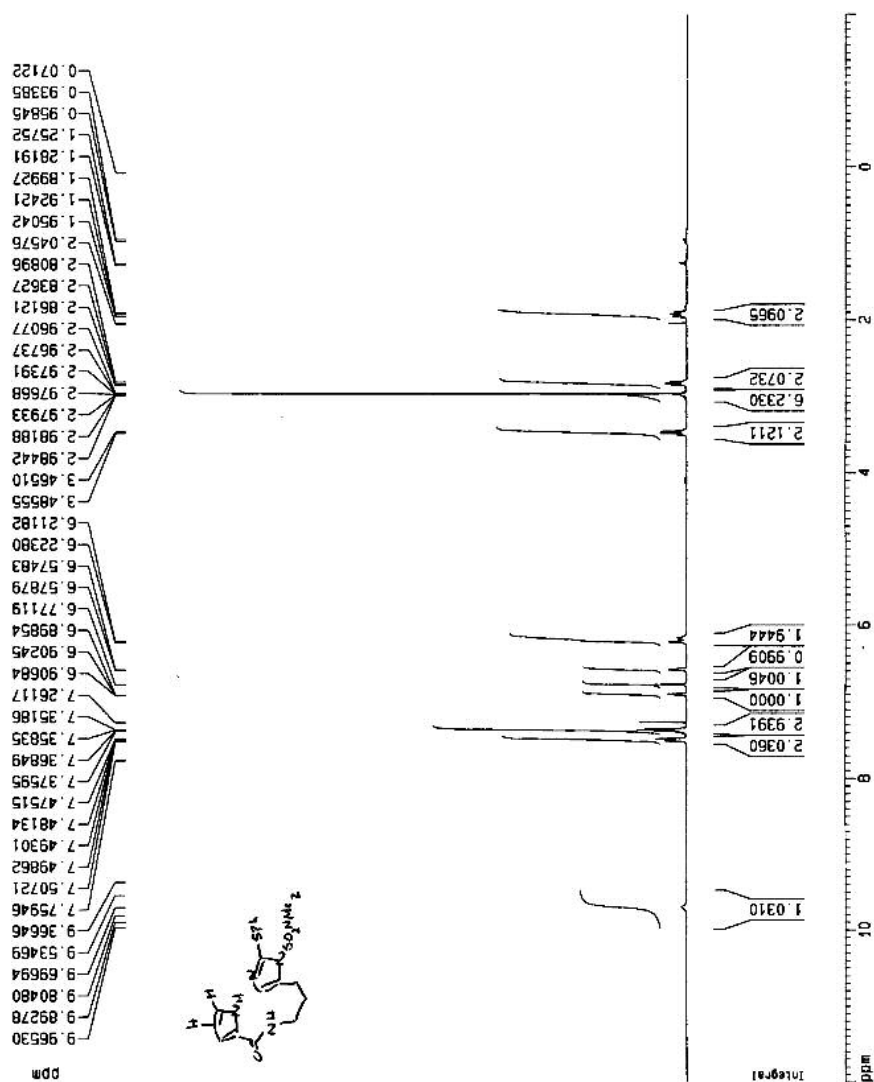

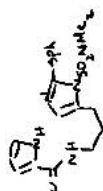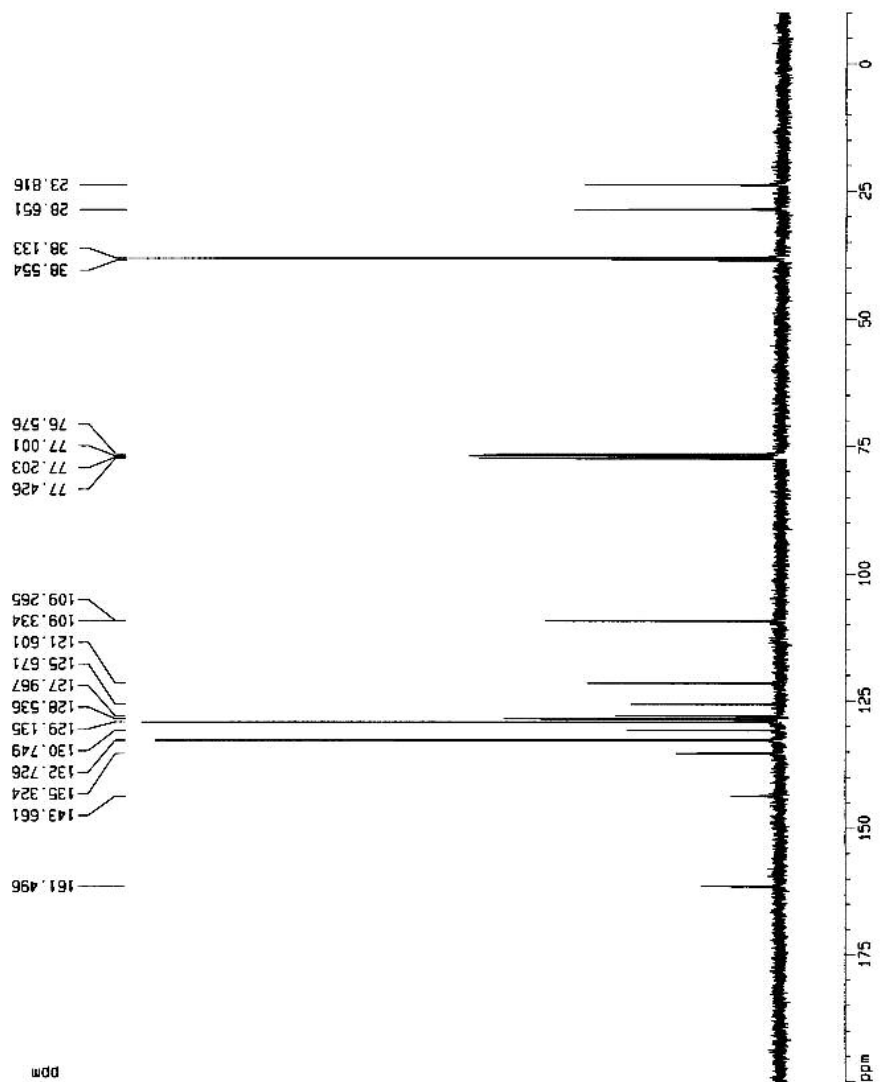

Current Data Parameters  
 NAME md1-051707  
 EXPNO 13  
 PROCNO 1

F2 - Acquisition Parameters  
 Date\_ 20070517  
 Time 17:21  
 INSTRUM spect  
 PULPROG zgpg30  
 TD 65536  
 SOLVENT CDCl3  
 NS 135  
 DS 0  
 SWH 18796.582 Hz  
 FIDRES 0.286013 Hz  
 AQ 1.7433078 sec  
 RG 655  
 DM 26.600 usec  
 DE 5.00 usec  
 TE 300.0 K  
 D1 2.0000000 sec  
 D11 0.0300000 sec  
 D12 0.0002000 sec

===== CHANNEL f1 =====  
 NUC1 13C  
 P1 5.40 usec  
 PL1 -6.00 dB  
 SF01 75 4106357 MHz

===== CHANNEL f2 =====  
 CPDPRG2 waltz16  
 NUC2 1H  
 P2 115.00 usec  
 PL2 0.00 dB  
 PL12 20.00 dB  
 PL13 20.00 dB  
 SF02 299.671595 MHz

F2 - Processing Parameters  
 SI 32768  
 SF 75 4023501 MHz  
 MVM EN  
 SSB 0  
 LB 1.00 Hz  
 GB 0  
 PC 1.40

1D NMR plot parameters  
 CX 20.00 cm  
 F1P 200.000 ppm  
 F1 15080.48 Hz  
 F2P -10.000 ppm  
 F2 -10.000 Hz  
 PRNCH 10 5000000/cu  
 HZCN 791.72510 MHz



mdf-02-239 NH/monobromo/protected sulfido amide - 400MHz

Current Data Parameters  
 NAME mdf-022006  
 EXPNO 6  
 PROCNO 1

F2 - Acquisition Parameters  
 Date\_ 20060920  
 Time 9:55  
 INSTRUM spect  
 PROBHD 5 mm BBI 1H-B  
 PULPROG zg30  
 TO 65536  
 SOLVENT CDCl3  
 NS 16  
 DS 2  
 SWH 8278.146 Hz  
 FIDRES 0.125314 Hz  
 AQ 3.9584243 sec  
 RG 382  
 DM 50.400 usec  
 DE 6.00 usec  
 TE 300.0 K  
 D1 1.00000000 sec

===== CHANNEL f1 =====  
 NUC1 1H  
 P1 6.45 usec  
 PL1 0.00 dB  
 SF01 400.1324710 MHz

F2 - Processing parameters  
 SI 32768  
 SF 400.130077 MHz  
 MDW no  
 SSB 0  
 LB 0.00 Hz  
 GB 0  
 PC 1.00

1D NMR plot parameters  
 CX 20.00 cm  
 FIP 12 000 gpm  
 F1 4801.56 Hz  
 F2 -2 000 gpm  
 F2 -800.26 Hz  
 FWHM 0.70000 ppm/cm  
 WZCN 200.09100 Hz/cm

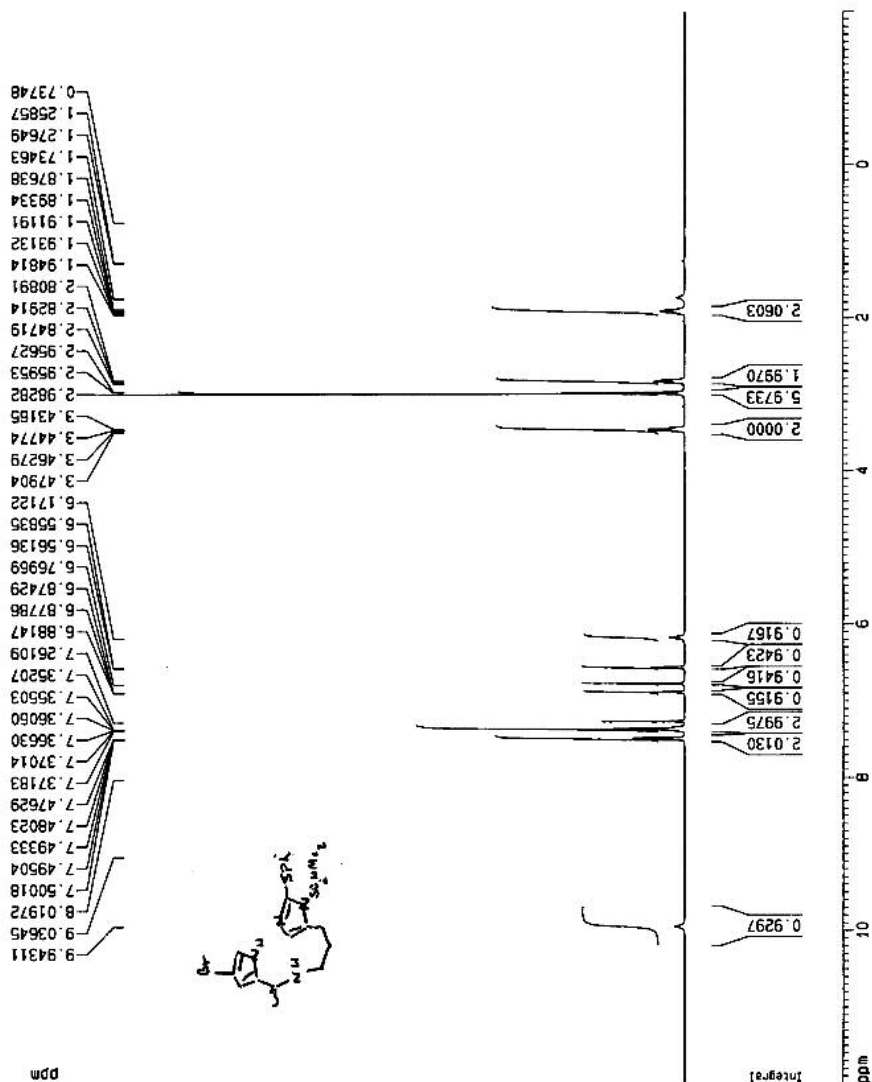

mdf-02-239 NH/monobromom/protected sulfido amide - 75MHz

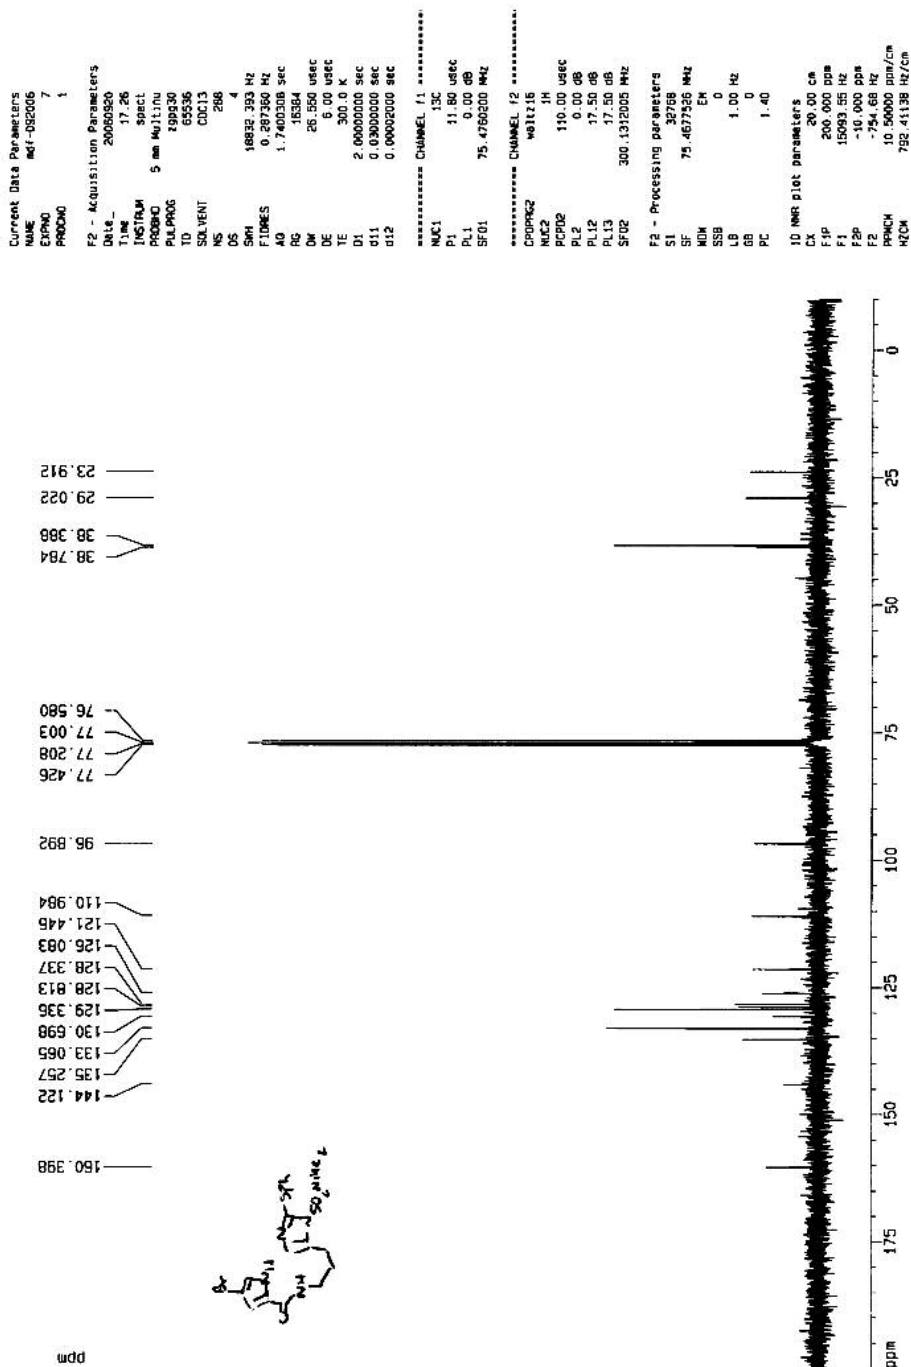

Current Data Parameters  
 NAME mdf-051107  
 EXPNO 1  
 PROCNO 1

F2 - Acquisition Parameters  
 Date\_ 20070511  
 Time 10:40  
 INSTRUM spect  
 PROBHD 5 mm BBI 1H-8  
 PULPROG zg30  
 TD 16384  
 SOLVENT DMSO  
 NS 18  
 DS 0  
 SFO1 8278.145 Hz  
 FIDRES 0.505258 Hz  
 AQ 0.986436 sec  
 RG 181  
 DW 60.400 usec  
 DE 6.00 usec  
 TE 300.0 K  
 D1 1.00000000 sec

\*\*\*\*\* CHANNEL f1 \*\*\*\*\*  
 NUC1 1H  
 P1 6.45 usec  
 PL1 0.00 dB  
 SF01 400.1324710 MHz

F2 - Processing parameters  
 SI 32768  
 SF 400.1300031 MHz  
 WDW em  
 SSB 0  
 LB 0.00 Hz  
 DB 0  
 PC 1.00

1D NMR plot parameters  
 CX 20.00 cm  
 F1P 12.000 ppm  
 F1 4801.55 Hz  
 F2P -2.000 ppm  
 F2 -800.26 Hz  
 PPM0K 0.70000 ppm/cm  
 HZ0K 280.05100 Hz/cm

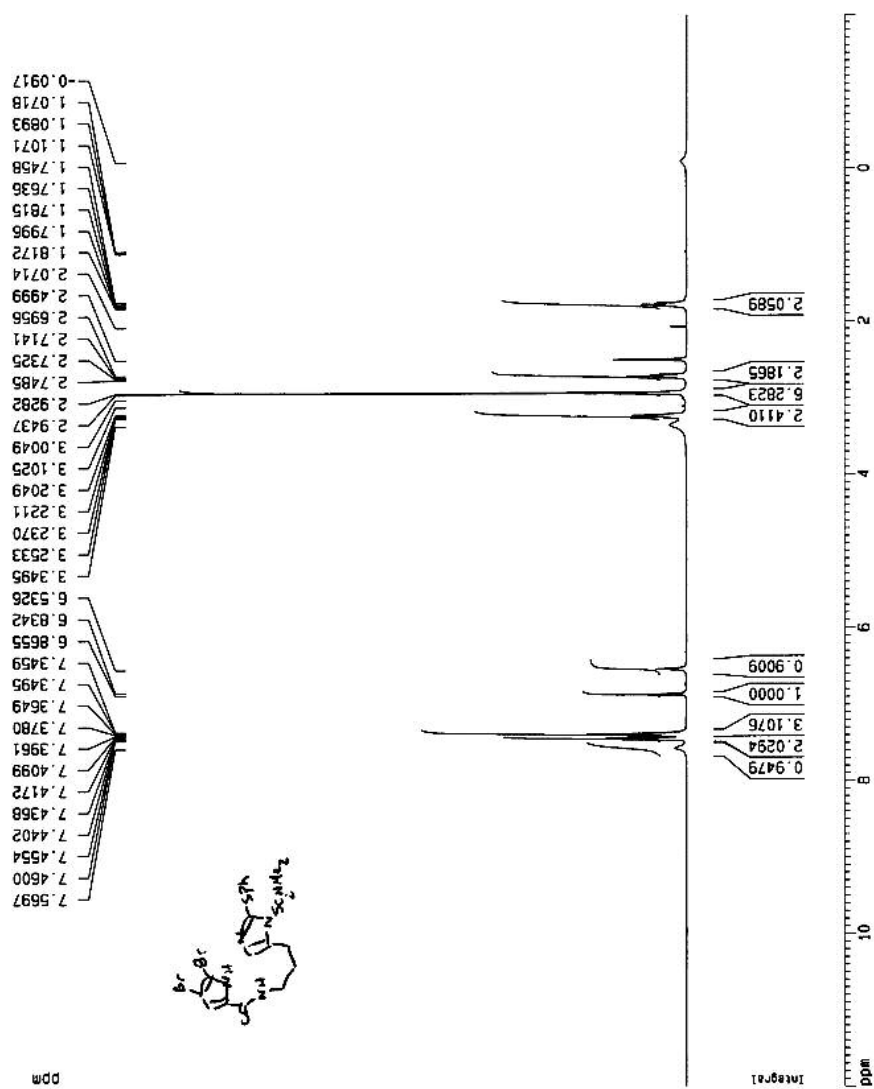

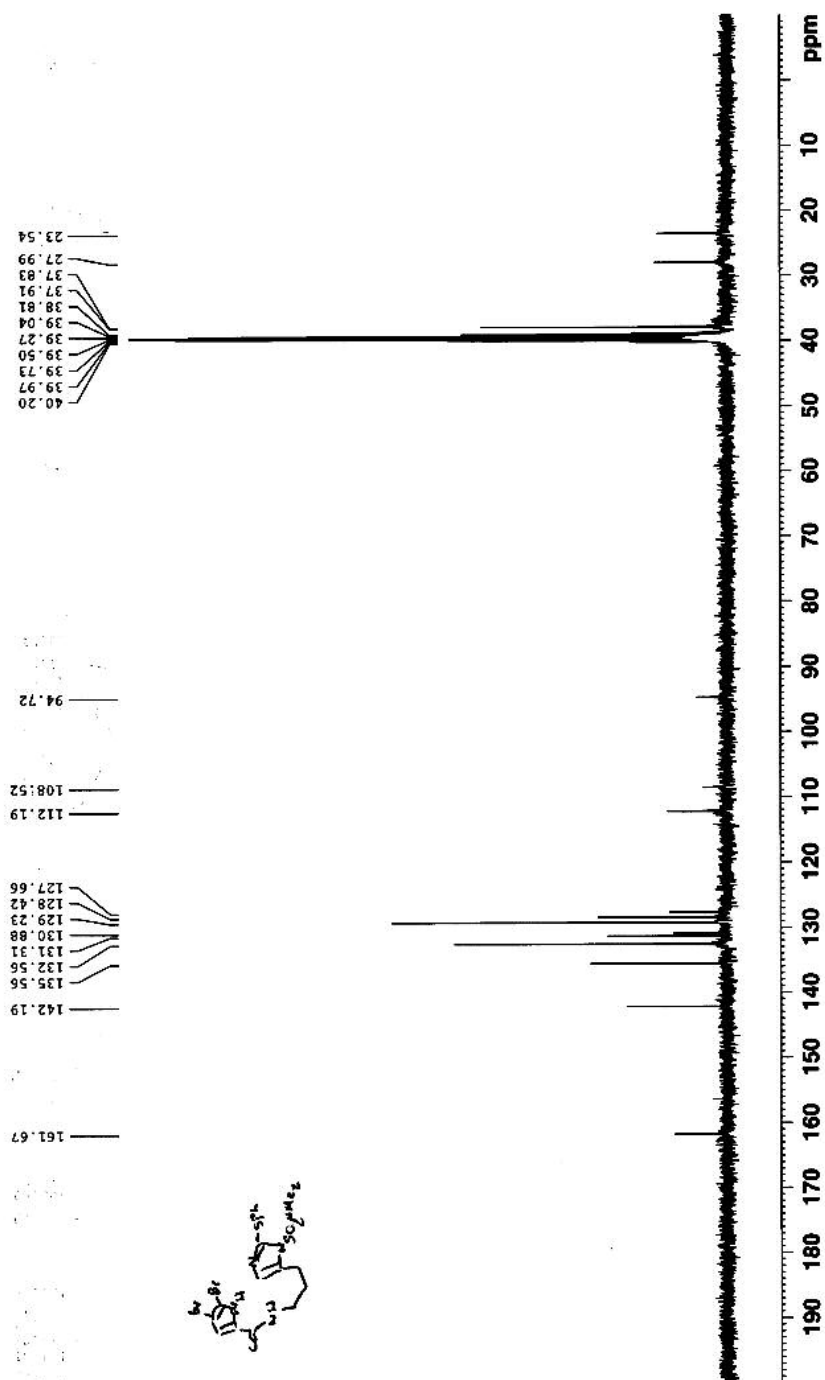

Current Data Parameters  
NAME md1-061407  
EXPNO 21  
PROCNO 1

F2 - Acquisition Parameters

Date\_ 20070614  
Time 15.34  
INSTRUM spect  
PROBHD 5 mm BBI 1H-8  
PULPROG zg30  
TD 65536  
SOLVENT DMSO  
NS 23  
DS 0  
SWH 8278.146 Hz  
FIDRES 0.505258 Hz  
AQ 0.9896436 sec  
RG 40.3  
DM 60.400 usec  
DE 6.00 usec  
TE 300.0 K  
D1 1.0000000 sec

===== CHANNEL f1 =====

NUC1 1H  
P1 6.45 usec  
PL 0.00 dB  
SFO1 400.1324710 MHz

F2 - Processing parameters

SI 32768  
SF 400.1300021 MHz  
WDW no  
SSB 0  
LB 0.00 Hz  
GB 0  
PC 1.00

1D NMR plot parameters

CX 20.00 cm  
F1 12.000 ppm  
F2 4801.55 Hz  
F3 -2.000 ppm  
F4 -800.25 Hz  
P1 0.70000 ppm/cm  
HZCM 280.05100 Hz/cm

3.30120  
3.28648  
2.92794  
2.90719  
2.75979  
2.74139  
2.72318  
2.50010  
1.85991  
1.84227  
1.82471

8.11150  
7.74400  
7.73598  
7.72658  
7.72208  
7.55883  
7.55001  
7.54414  
7.13412  
6.82704

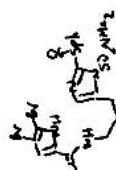

ppm

2.1185  
6.1300  
2.2605  
2.1978

1.0000  
2.0140  
3.0258  
0.9915  
1.0279

Integral

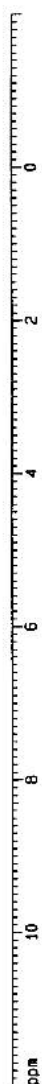

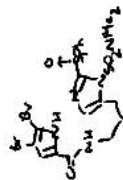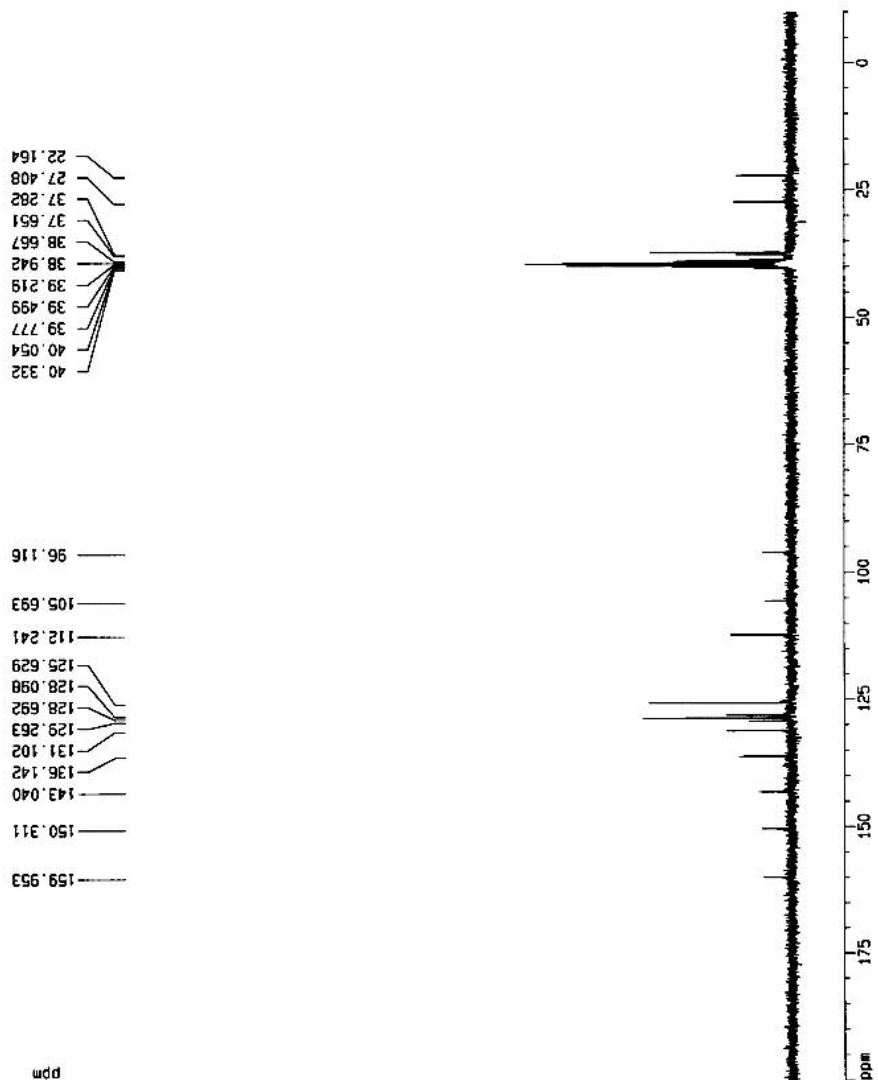

Current Data Parameters  
NAME nml-060107  
EXPNO 11  
PROCNO 1

F2 - Acquisition Parameters  
Date\_ 20070601  
Time 14.47  
INSTRUM spect  
PROBHD 5 mm Multinu  
PULPROG zgpg30  
TD 65536  
SOLVENT DMSO  
NS 169  
DS 4  
SWH 19832.353 Hz  
FIDRES 0.287360 Hz  
AQ 1.7400308 sec  
RG 8192  
ON 26.350 usec  
DE 6.00 usec  
TE 300.0 K  
D1 2.00000000 sec  
d11 0.03000000 sec  
d12 0.00000000 sec

----- CHANNEL f1 -----  
NUC1 <sup>13</sup>C  
P1 11.80 usec  
PL 0.00 dB  
SF01 75.4763200 MHz

----- CHANNEL f2 -----  
CPDPRG2 mlti216  
NUC2 <sup>1</sup>H  
PCPD2 110.00 usec  
PL2 0.00 dB  
PL12 17.50 dB  
PL13 17.50 dB  
SF02 300.1312005 MHz

F2 - Processing parameters  
SI 32768  
SF 75.4678108 MHz  
WDW EM  
SSB 0  
LB 1.00 Hz  
GB 0  
PC 1.40

10 NMR plot parameters  
CX 20.00 cm  
F1P 200.000 ppm  
F1 15093.56 Hz  
F2P -10.000 ppm  
F2 -754.68 Hz  
NUC1 <sup>13</sup>C  
NUC2 <sup>1</sup>H  
AQ 1.7400308 sec

Current Data Parameters  
NAME mdf-051507  
EXPNO 2  
PROCNO 1

F2 - Acquisition Parameters  
Date\_ 20070515  
Time 15.53  
INSTRUM spect  
PROBHD 5 mm QNP 1H/1  
PULPROG zgpg30  
TD 65536  
SOLVENT DMSO  
NS 23  
DS 2  
SWH 6172.839 Hz  
FIDRES 0.376760 Hz  
AQ 1.3271540 sec  
RG 50.8  
DM 81.000 usec  
DE 6.00 usec  
TE 300.0 K  
D1 1.00000000 sec

\*\*\*\*\* CHANNEL f1 \*\*\*\*\*  
NUC1 1H  
P1 11.70 usec  
PL1 0.00 dB  
SFO1 299.8718518 MHz

F2 - Processing parameters  
SI 32768  
SF 299.8700095 MHz  
WDW no  
SSB 0  
LB 0.00 Hz  
GB 0  
PC 1.00

1D NMR plot parameters  
CX 20.00 cm  
FIP 12.000 ppm  
F1 3598.44 Hz  
F2 -2.000 ppm  
FZ -595.74 Hz  
PRICK 0.70000 pps/cm  
HZCM 209.90900 Hz/cm

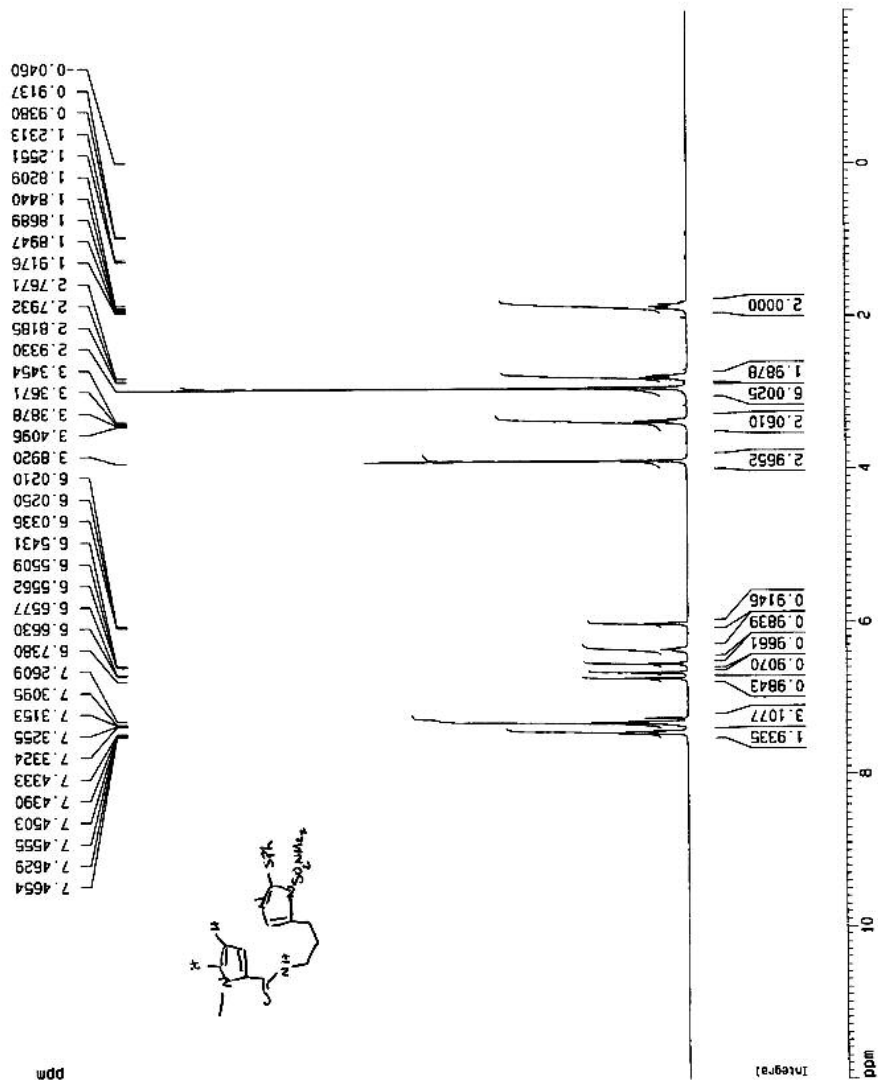

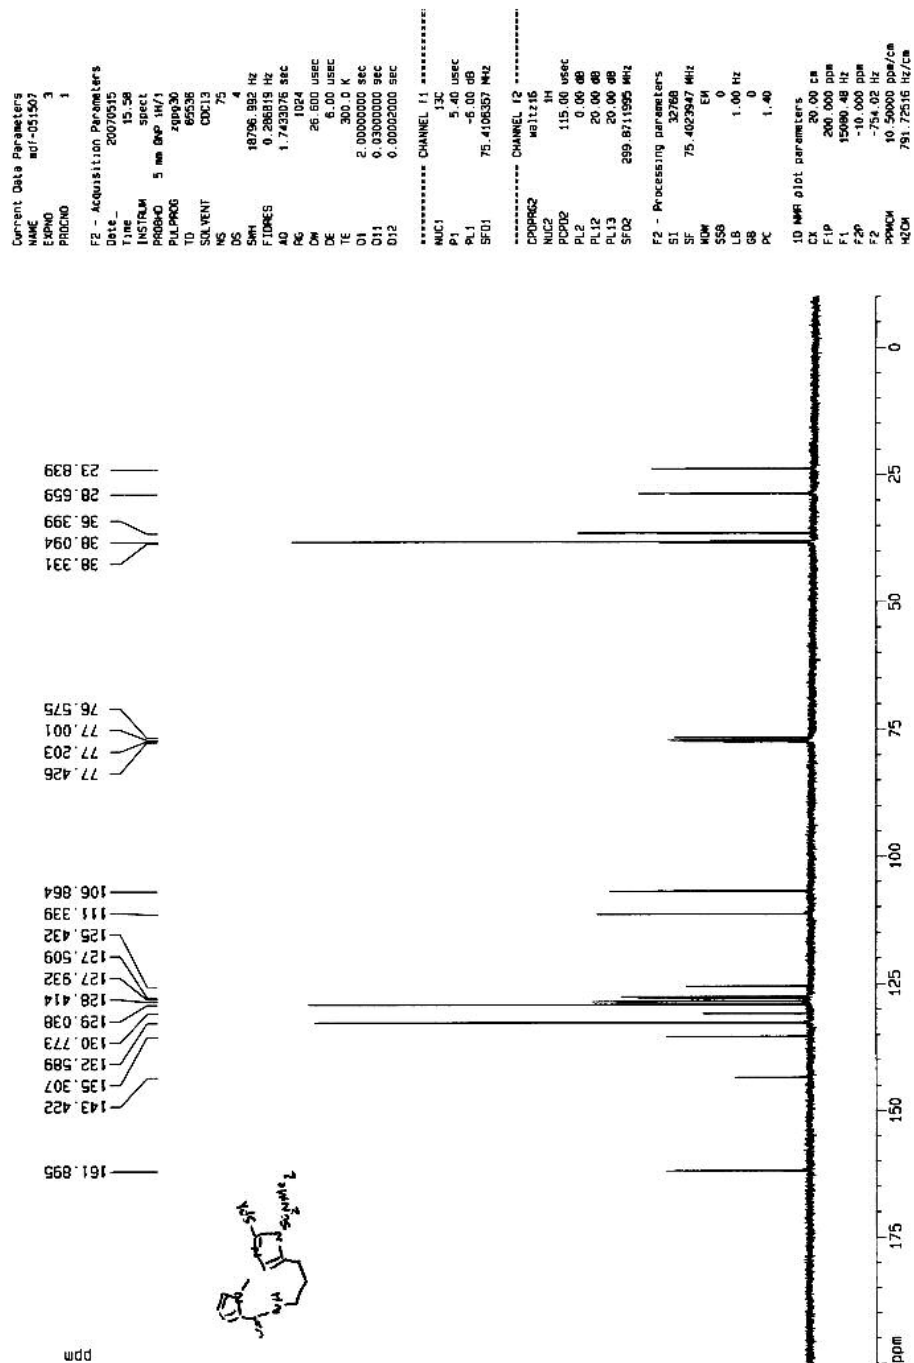



Current Data Parameters  
NAME ndf-051507  
EXPNO 4  
PROCNO 1

F2 - Acquisition Parameters  
Date\_ 20070515  
Time 15.03  
INSTRUM spect  
PROBHD 5 mm QNP 1H/1  
PULPROG zgpg30  
TD 16384  
SOLVENT CDCl3  
NS 32  
DS 2  
SWH 6172.839 Hz  
FIDRES 0.376760 Hz  
AQ 1.3271540 sec  
RG 71.8  
DM 81.000 usec  
DE 6.00 usec  
TE 300.0 K  
D1 1.00000000 sec

===== CHANNEL f1 =====  
NUC1 1H  
P1 11.70 usec  
PL1 0.00 dB  
SF01 299.8718618 MHz

F2 - Processing parameters  
SI 32768  
SF 299.870084 MHz  
WDW no  
SSB 0  
LB 0.00 Hz  
GB 0  
PC 1.00

1D NMR plot parameters  
CX 20.00 cm  
FIP 12.000 ppm  
F1 3598.44 Hz  
F2P -2.000 ppm  
F2 -595.74 Hz  
PRMCM 0.70000 ppm/cm  
HZCM 209.90900 Hz/cm

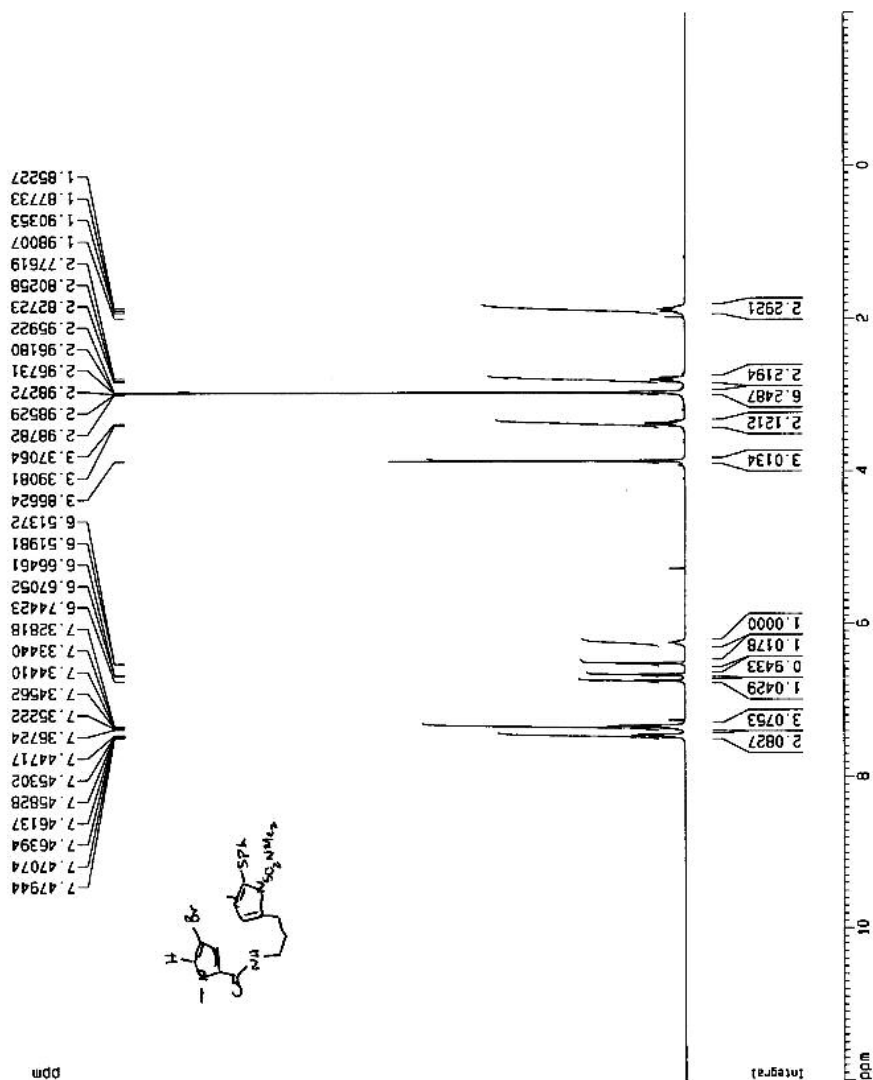

Current Data Parameters  
NAME: m01-051507  
EXPNO: 5  
PROCNO: 1

F2 - Acquisition Parameters  
Date\_: 20070515  
Time: 16.11  
INSTRUM: spect  
PROBHD: 5 mm QNP 1H/1  
PULPROG: zgpg30  
TD: 65536  
SOLVENT: CDCl3  
NS: 76  
DS: 4  
SWH: 18796.982 Hz  
FIDRES: 0.266919 Hz  
AQ: 1.7433076 sec  
RG: 1024  
DM: 26.600 usec  
DE: 6.00 usec  
TE: 300.0 K  
D1: 2.0000000 sec  
D11: 0.0300000 sec  
D12: 0.0000000 sec

\*\*\*\*\* CHANNEL f1 \*\*\*\*\*  
NUC1: 13C  
P1: 5.40 usec  
PL1: -6.00 dB  
SF01: 75.4105357 MHz

\*\*\*\*\* CHANNEL f2 \*\*\*\*\*  
CPDPRG2: waltz16  
NUC2: 1H  
PCPD2: 115.00 usec  
PL2: 0.00 dB  
PL12: 20.00 dB  
PL13: 20.00 dB  
SF02: 299.8711953 MHz

F2 - Processing parameters  
SI: 32768  
SF: 75.4023532 MHz  
WDW: EM  
SSB: 0  
LB: 1.00 Hz  
GB: 0  
PC: 1.40

1D NMR plot parameters  
CX: 20.00 cm  
FIP: 200.000 ppm  
F1: 15000.48 Hz  
F2P: -10.000 ppm  
F2: -754.02 Hz  
PPMCON: 10.50000 ppm/cm  
MZN: 791.72504 Hz/cm

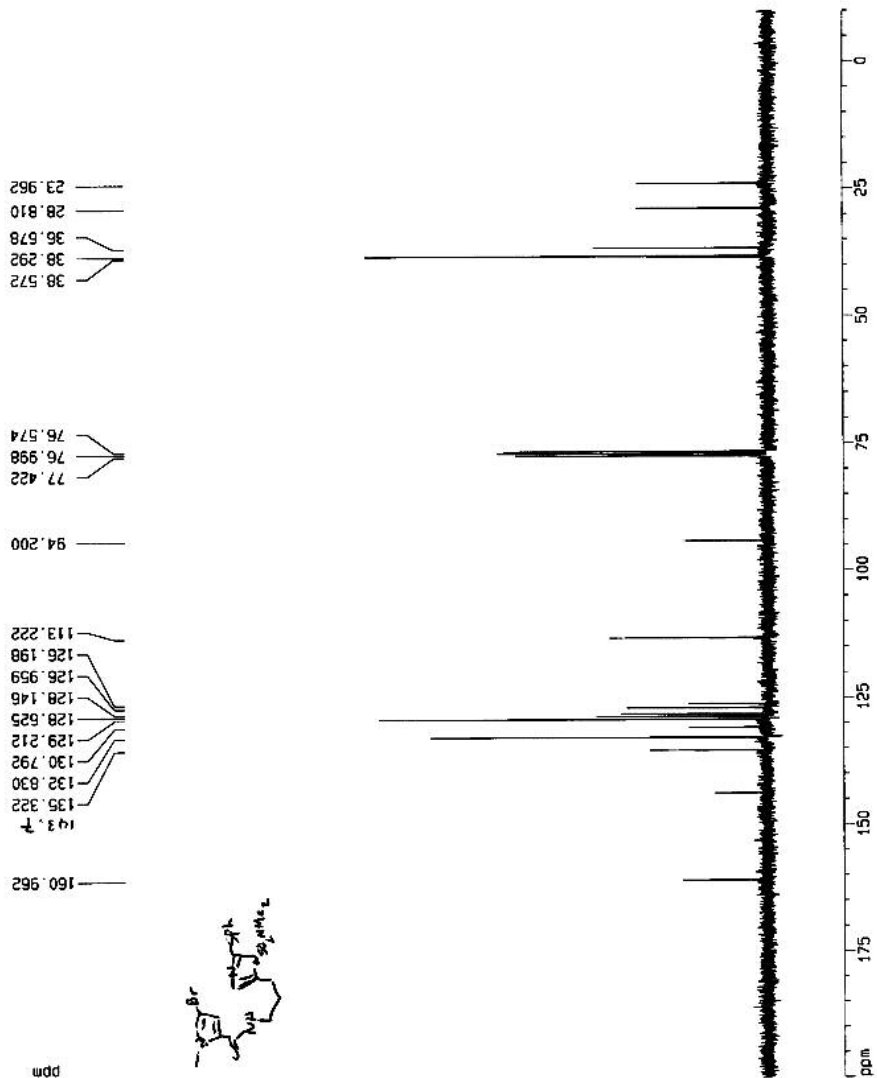





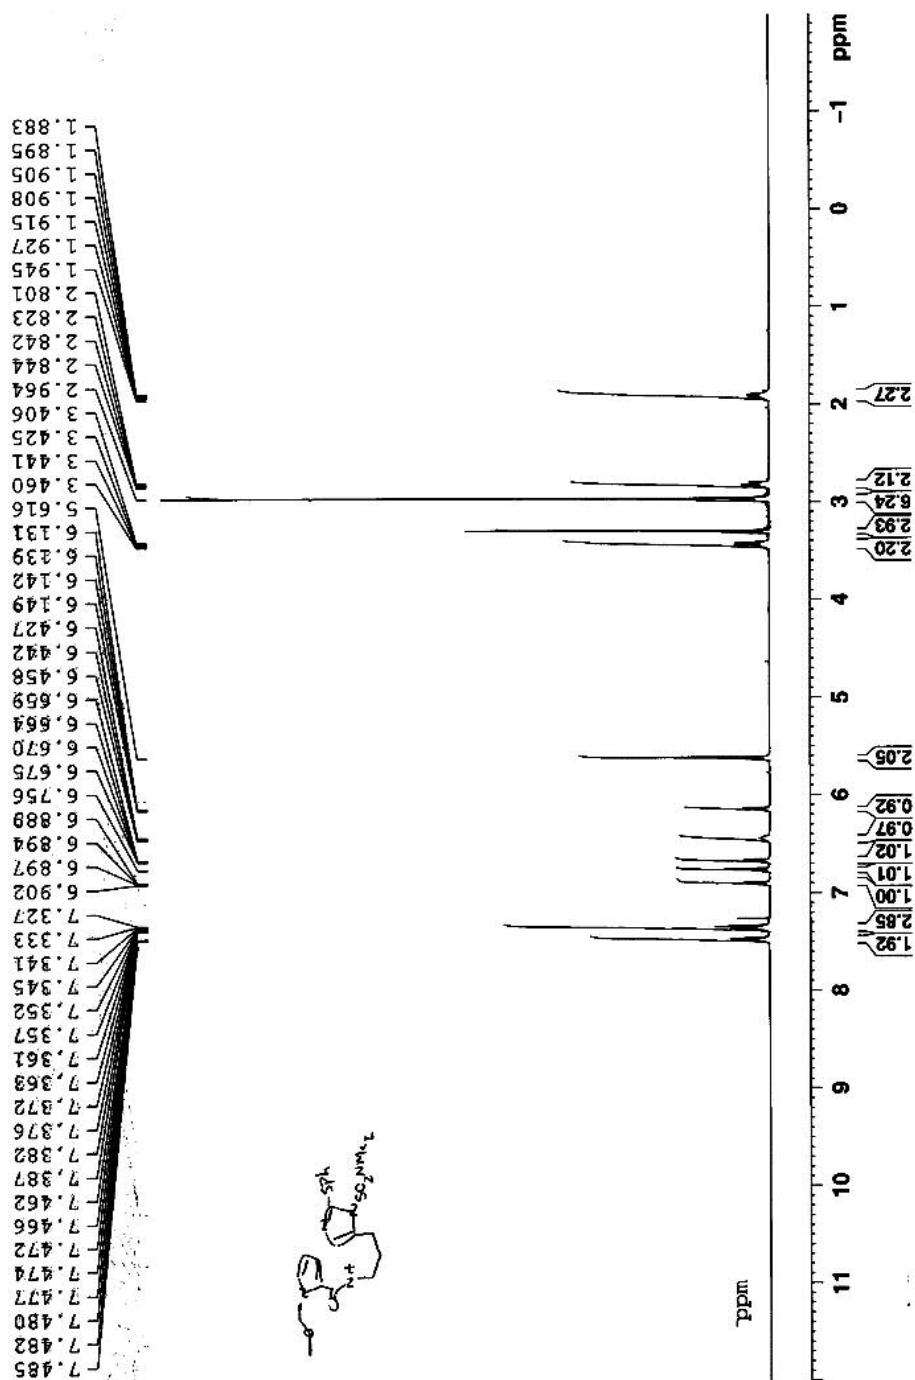

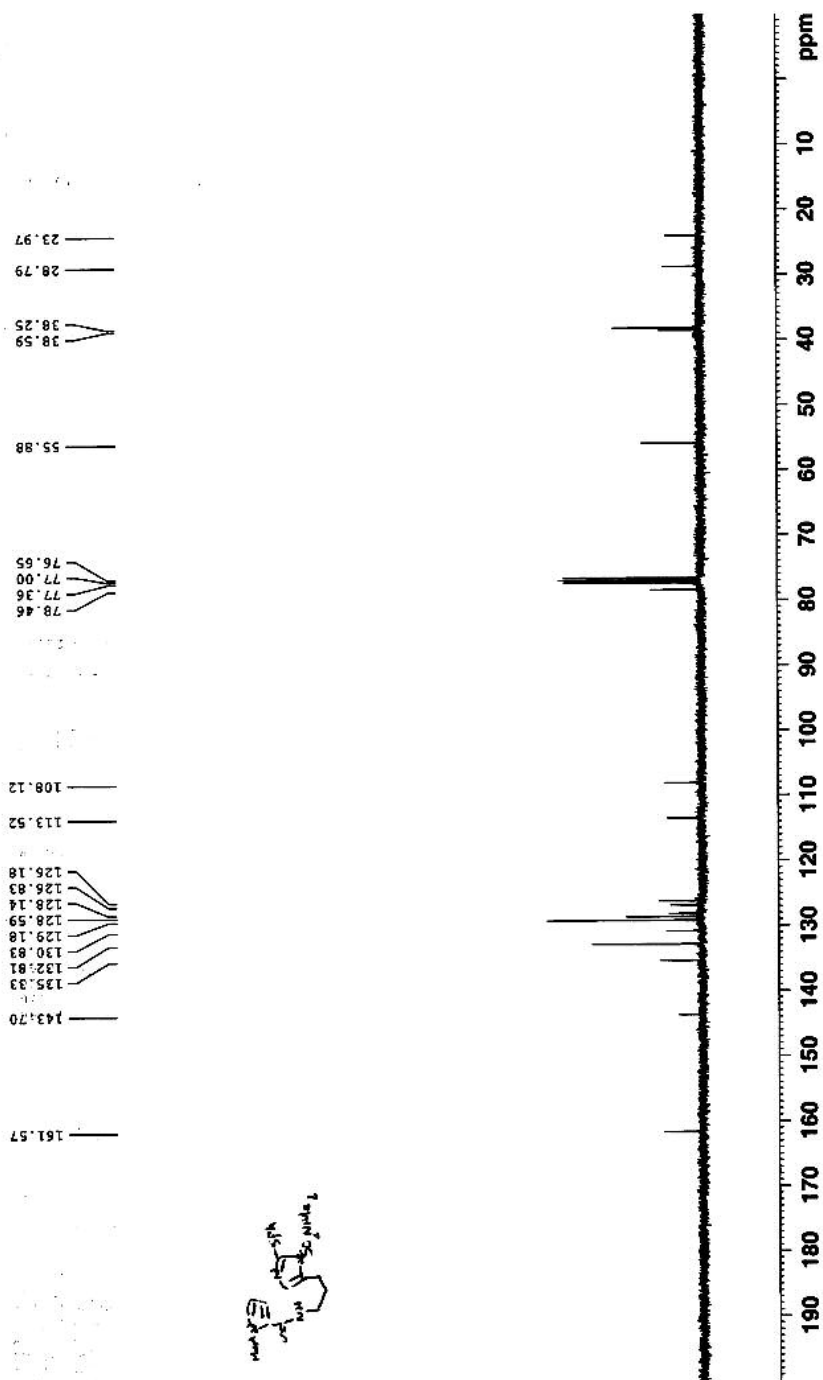



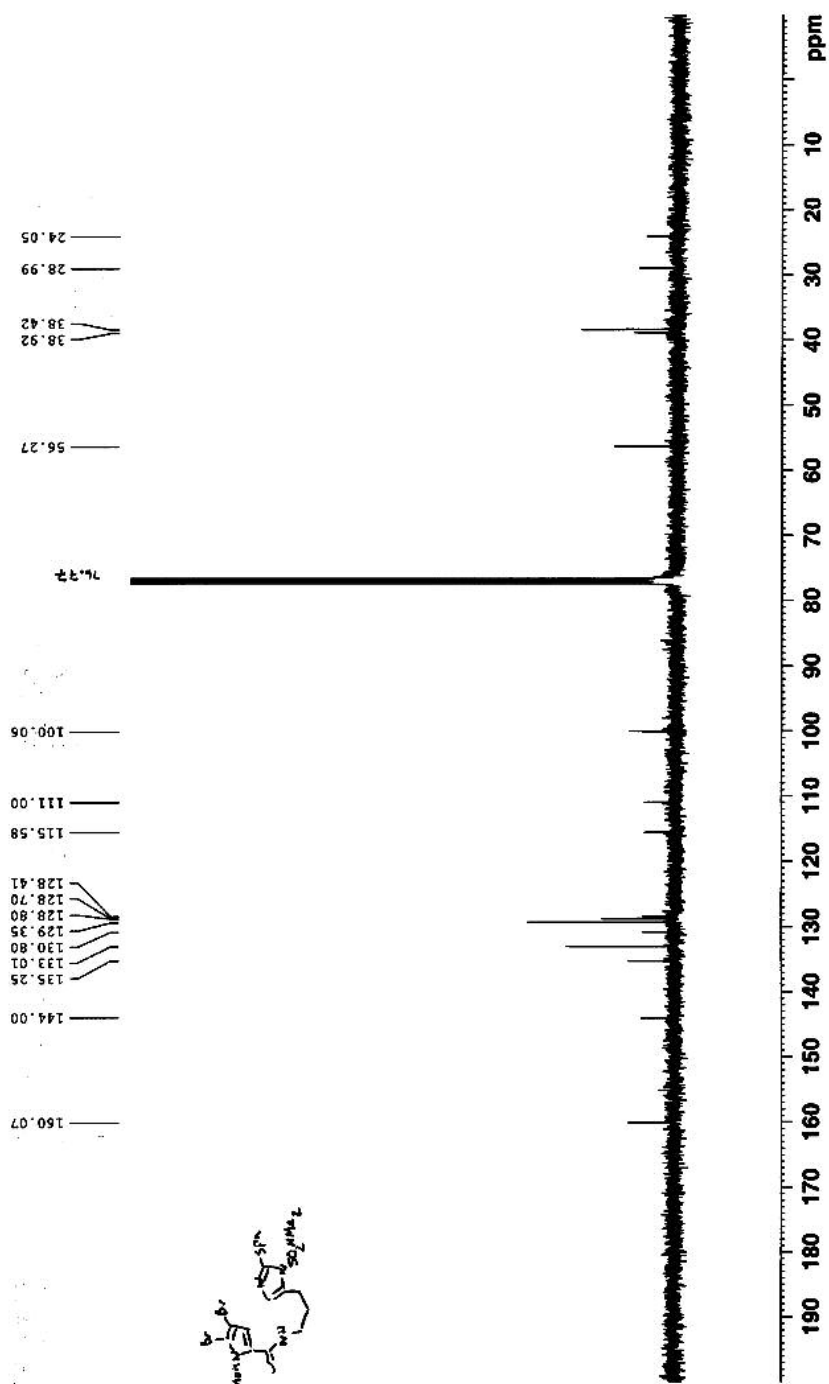



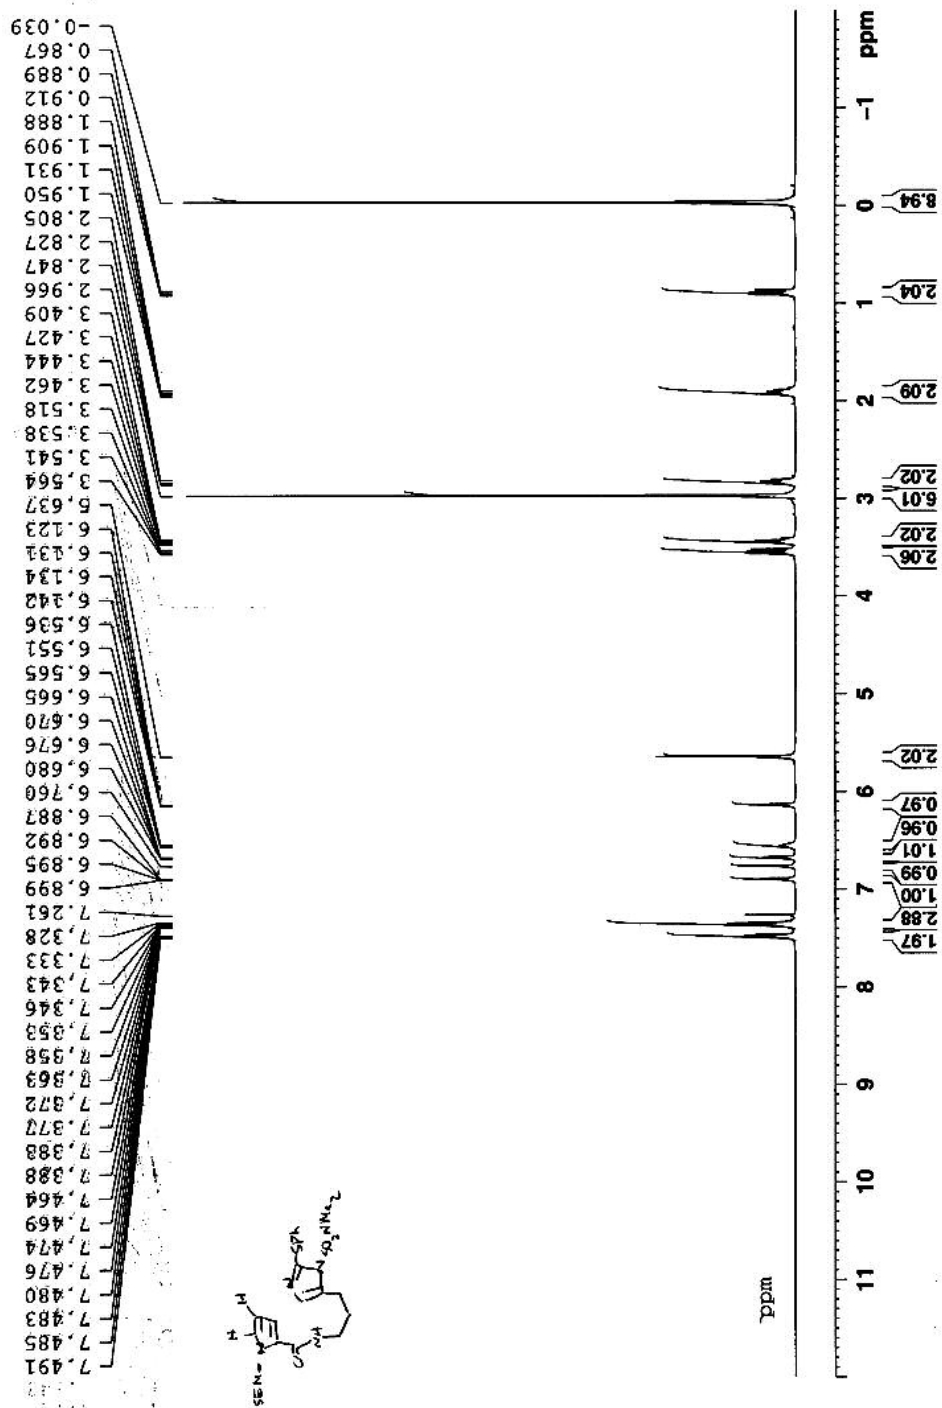

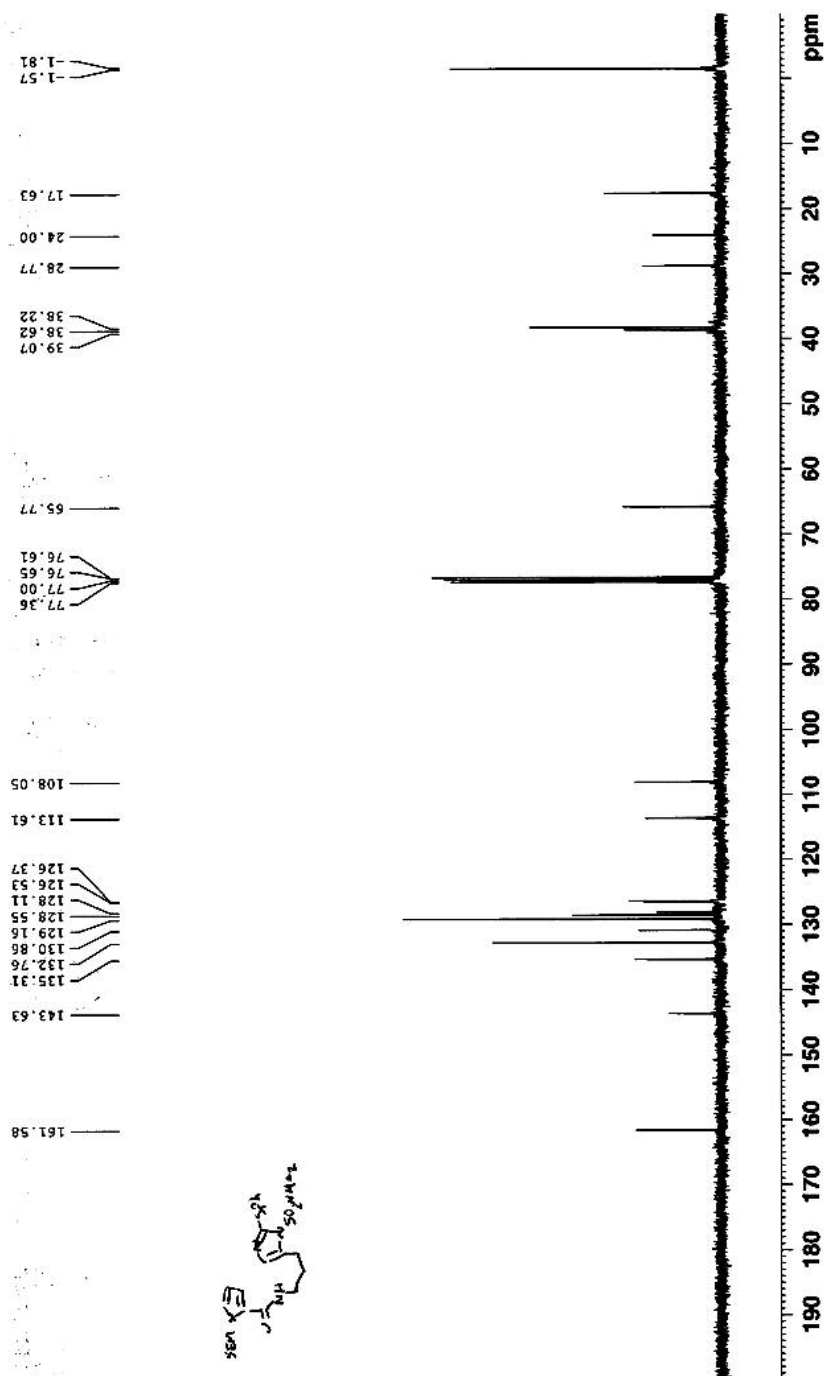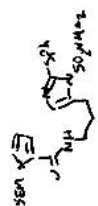

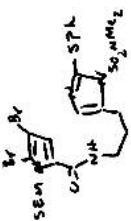



Current Data Parameters  
NAME mdf-051507  
EXPNO 5  
PROCNO 1

F2 - Acquisition Parameters  
Date\_ 20070519  
Time 20.33  
INSTRUM spect  
PROBHD 5 mm BBI 1H-5  
PULPROG zg30  
TD 16384  
SOLVENT MECH  
NS 16  
DS 0  
SWH 8278.146 Hz  
FIDRES 0.595258 Hz  
AQ 0.5956436 sec  
RG 228.1  
DM 60.400 usec  
DE 6.00 usec  
TE 300.0 K  
D1 1.00000000 sec

===== CHANNEL f1 =====  
NUC1 1H  
P1 6.45 usec  
PL1 0.00 dB  
SFO1 400.1324710 MHz

F2 - Processing parameters  
SI 32768  
SF 400.1300117 MHz  
WDW no  
SSB 0  
LB 0.00 Hz  
GB 0  
PC 1.00

10 NMR plot parameters  
CX 20.00 cm  
F1P 12.000 ppm  
F1 4801.56 Hz  
F2P -2.000 ppm  
F2 -800.25 Hz  
PPM0 0.70000 ppm/cm  
HZCM 280.09100 Hz/cm

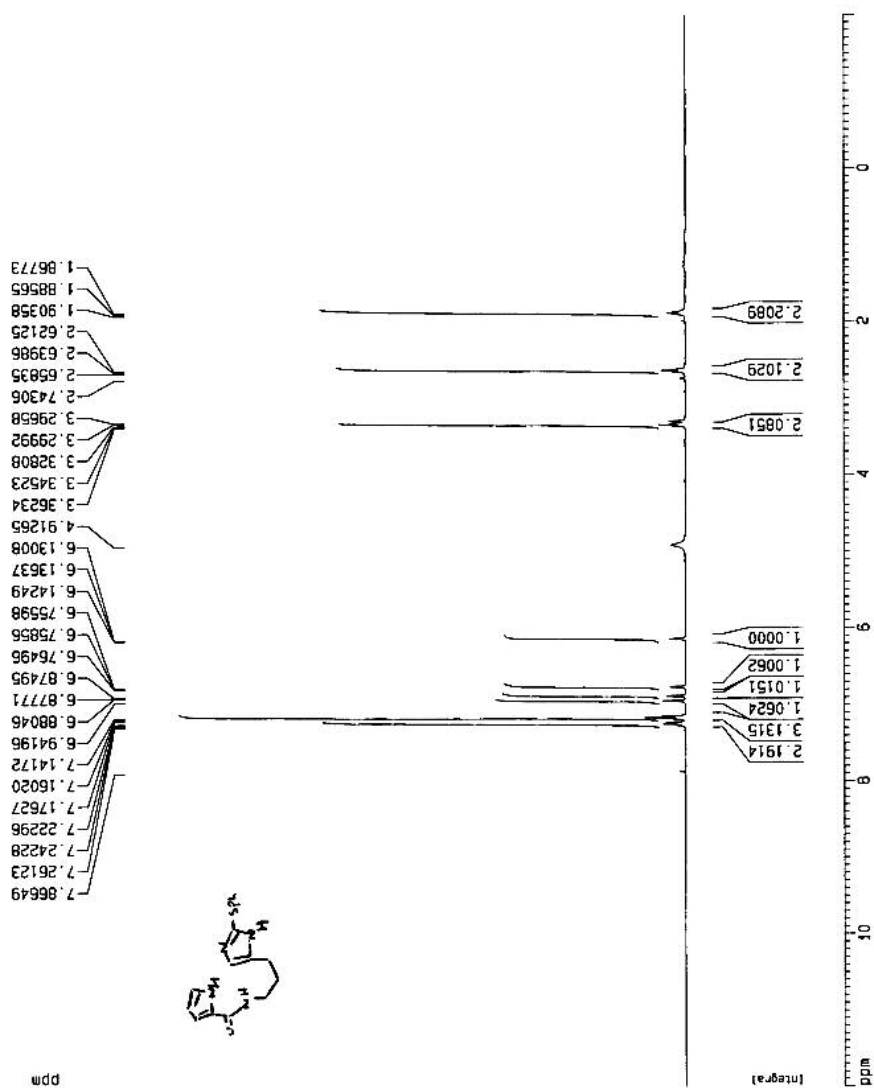

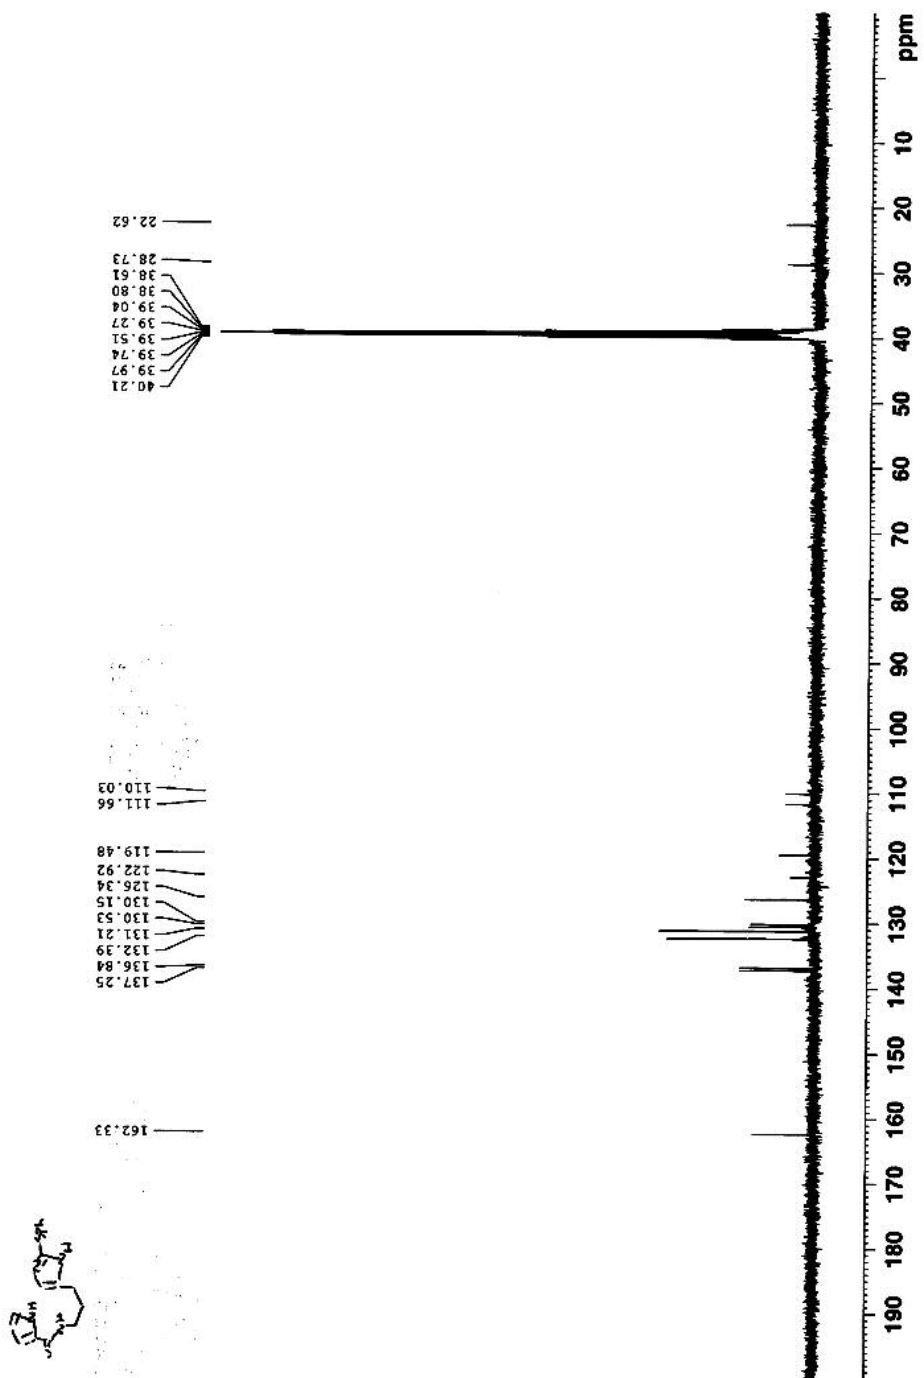

Current Data Parameters  
NAME md-051607  
EXPNO 7  
PROCNO 1

F2 - Acquisition Parameters  
Date\_ 20070516  
Time 15:37  
INSTRUM spect  
PROBHD 5 mm Multinu  
PULPROG zg30  
TO 16384  
SOLVENT MeOH  
NS 18  
DS 0  
SWH 6172.639 Hz  
FIDRES 0.376750 Hz  
AQ 1.3271540 sec  
RG 203.2  
DM 81.000 usec  
DE 6.00 usec  
TE 300.0 K  
D1 1.00000000 sec

\*\*\*\*\* CHANNEL f1 \*\*\*\*\*  
NUC1 <sup>1</sup>H  
P1 9.50 usec  
PL1 -6.00 dB  
SFO1 300.1318534 MHz

F2 - Processing parameters  
SI 32768  
SF 300.130079 MHz  
WDW no  
SSB 0  
LB 0.00 Hz  
GB 0  
PC 1.00

10 NMR plot parameters  
CX 20.00 cm  
F1P 12.000 ppm  
F1 3601.56 Hz  
F2P -2.000 ppm  
F2 -600.26 Hz  
PPMCM 0.70000 ppm/cm  
HZCM 210.09100 Hz/cm

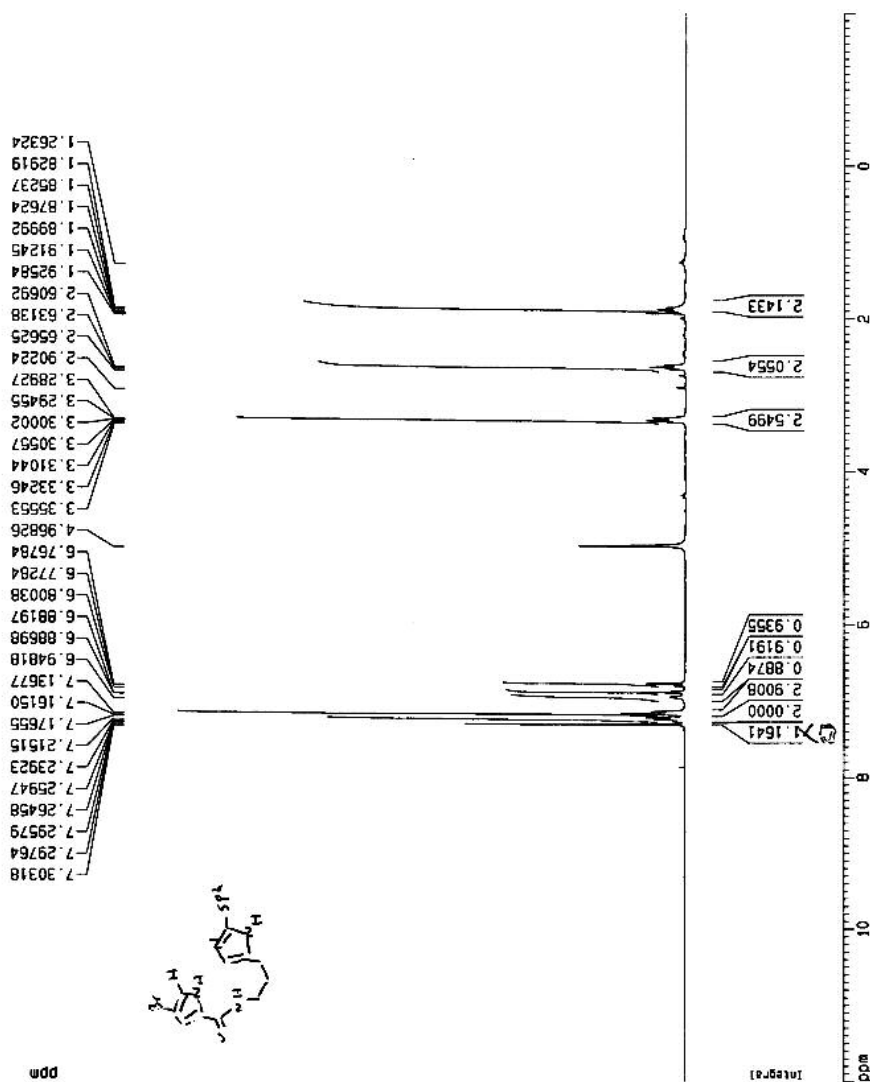

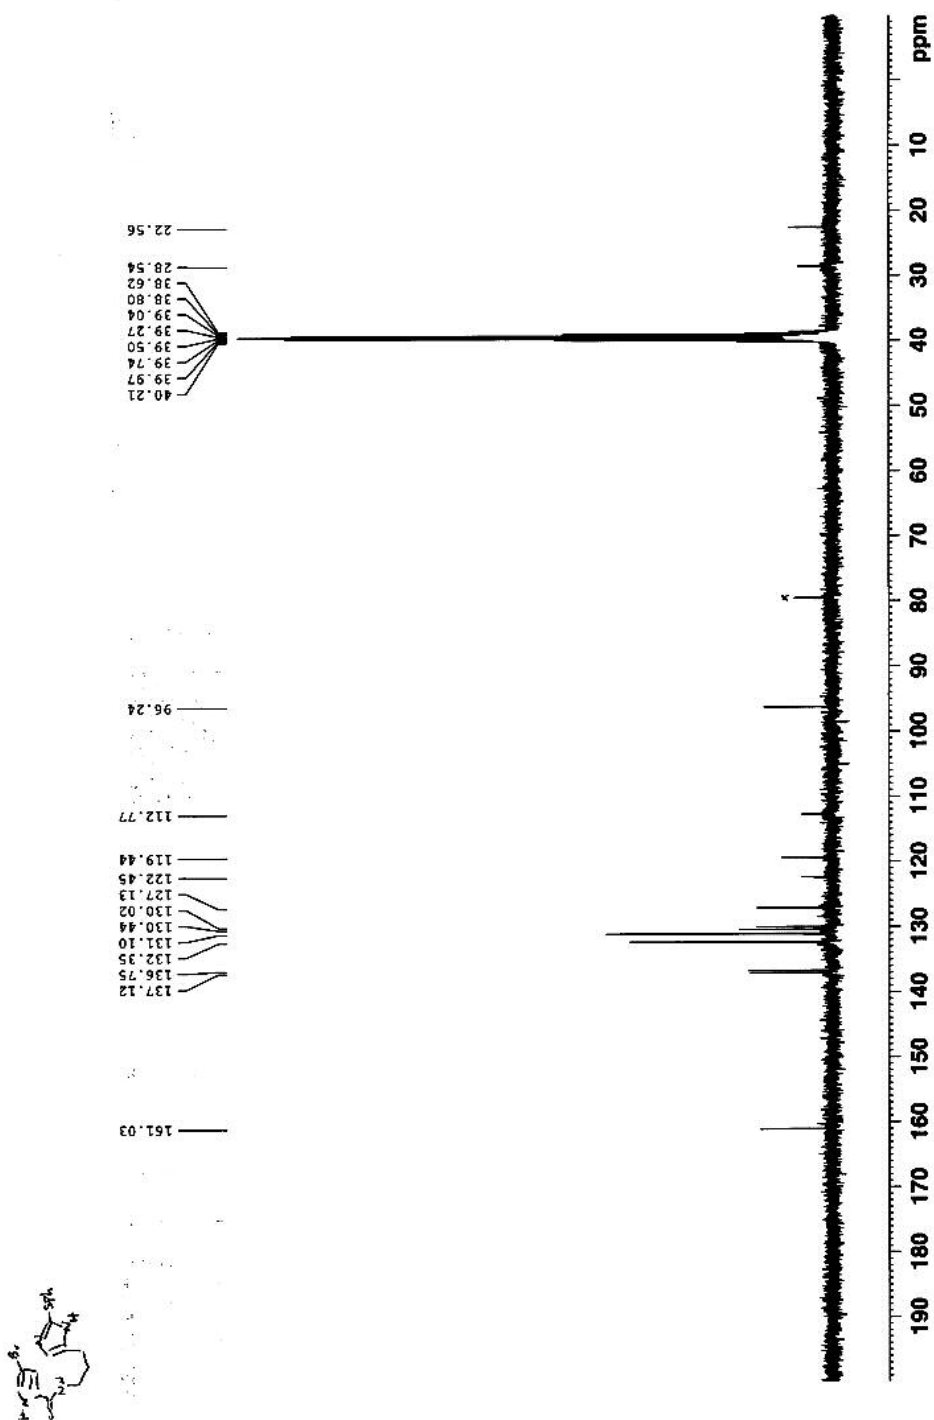



Current Data Parameters  
NAME mcf-051707  
EXPNO 20  
PROCNO 1

F2 - Acquisition Parameters  
Date\_ 20070517  
Time 19.09  
INSTRUM spect  
PROBHD 5 mm BBI 1H-5  
PULPROG zgpg30  
TD 65536  
SOLVENT CDCl3  
NS 16  
DS 2  
SWH 8278.146 Hz  
FIDRES 0.505258 Hz  
AQ 0.9896435 sec  
RG 40.3  
DM 60.400 usec  
DE 6.00 usec  
TE 300.0 K  
D1 1.00000000 sec

===== CHANNEL f1 =====  
NUC1 1H  
P1 6.45 usec  
PL 0.00 dB  
SFO1 400.1324710 MHz

F2 - Processing parameters  
SI 32768  
SF 400.130085 MHz  
MDM EM  
SSB 0  
LB 0.30 Hz  
GB 0  
PC 1.00

1D NMR plot parameters  
CX 20.00 cm  
FIP 11.000 ppm  
F1 4401.43 Hz  
F2P -1.000 ppm  
F2 -400.13 Hz  
PPMCH 0.60000 ppm/cm  
HZCM 240.07800 Hz/cm

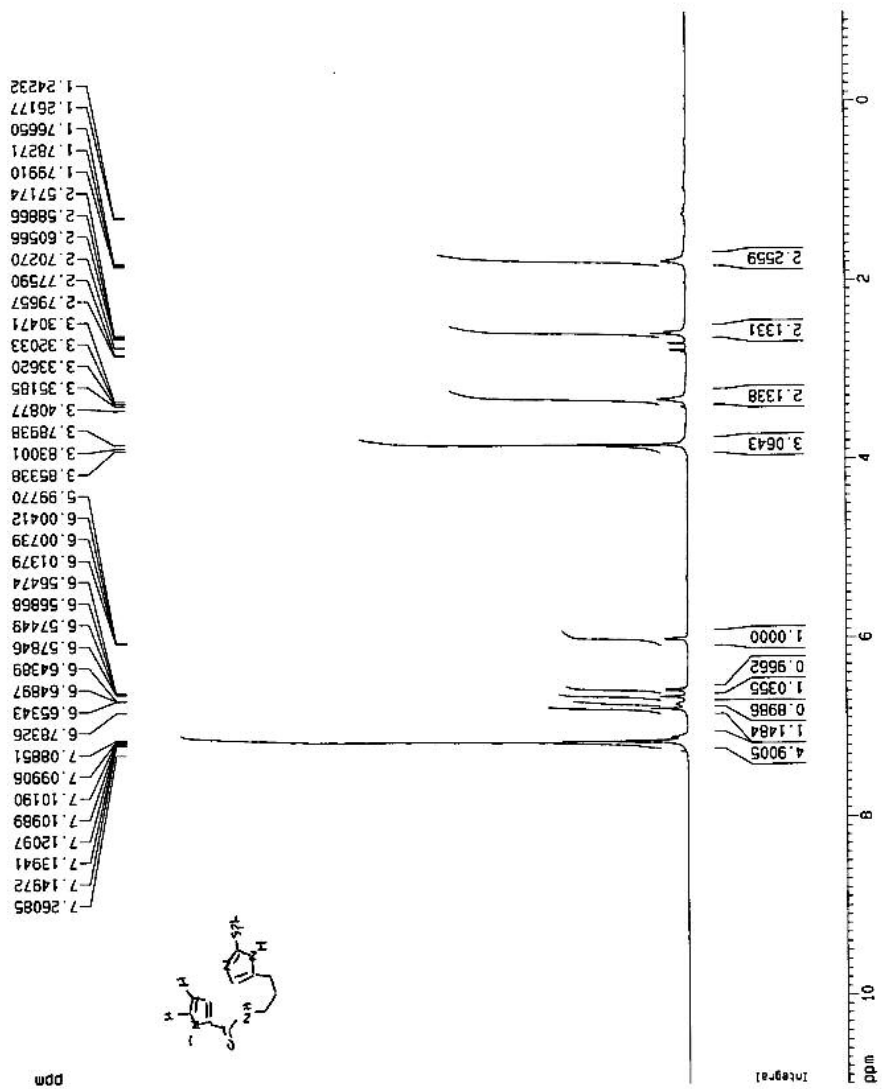

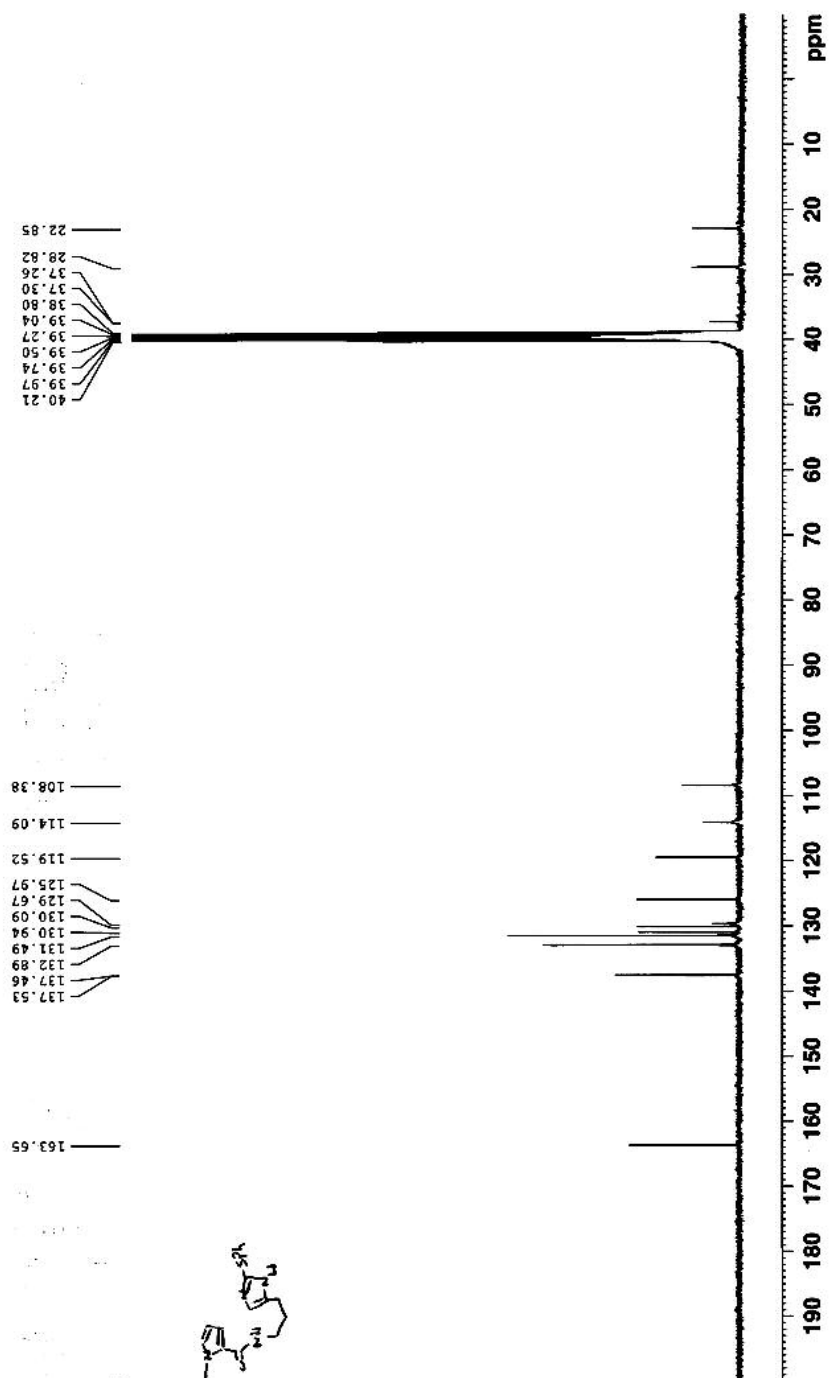

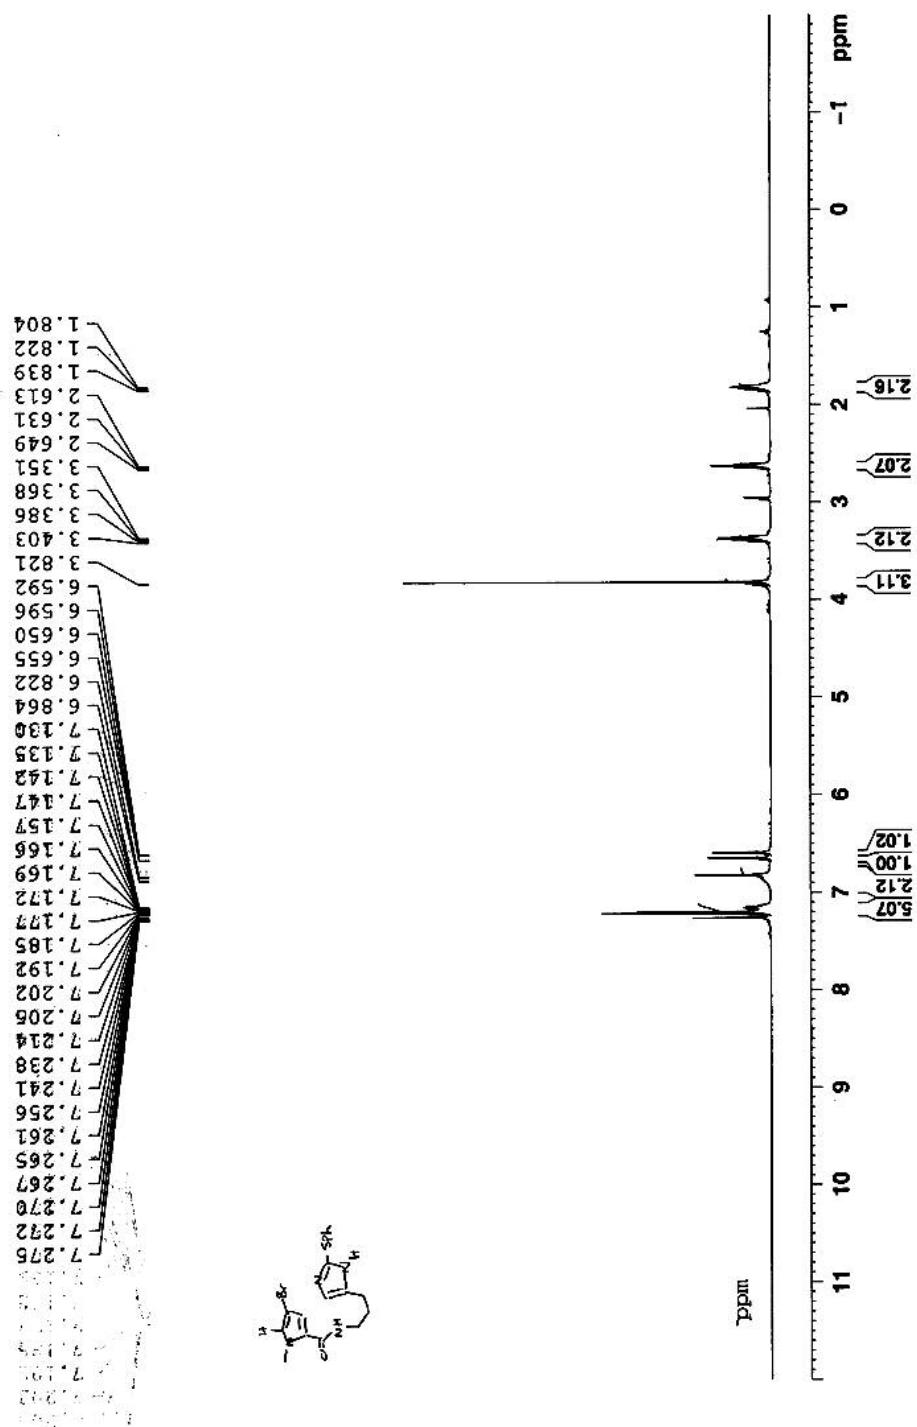

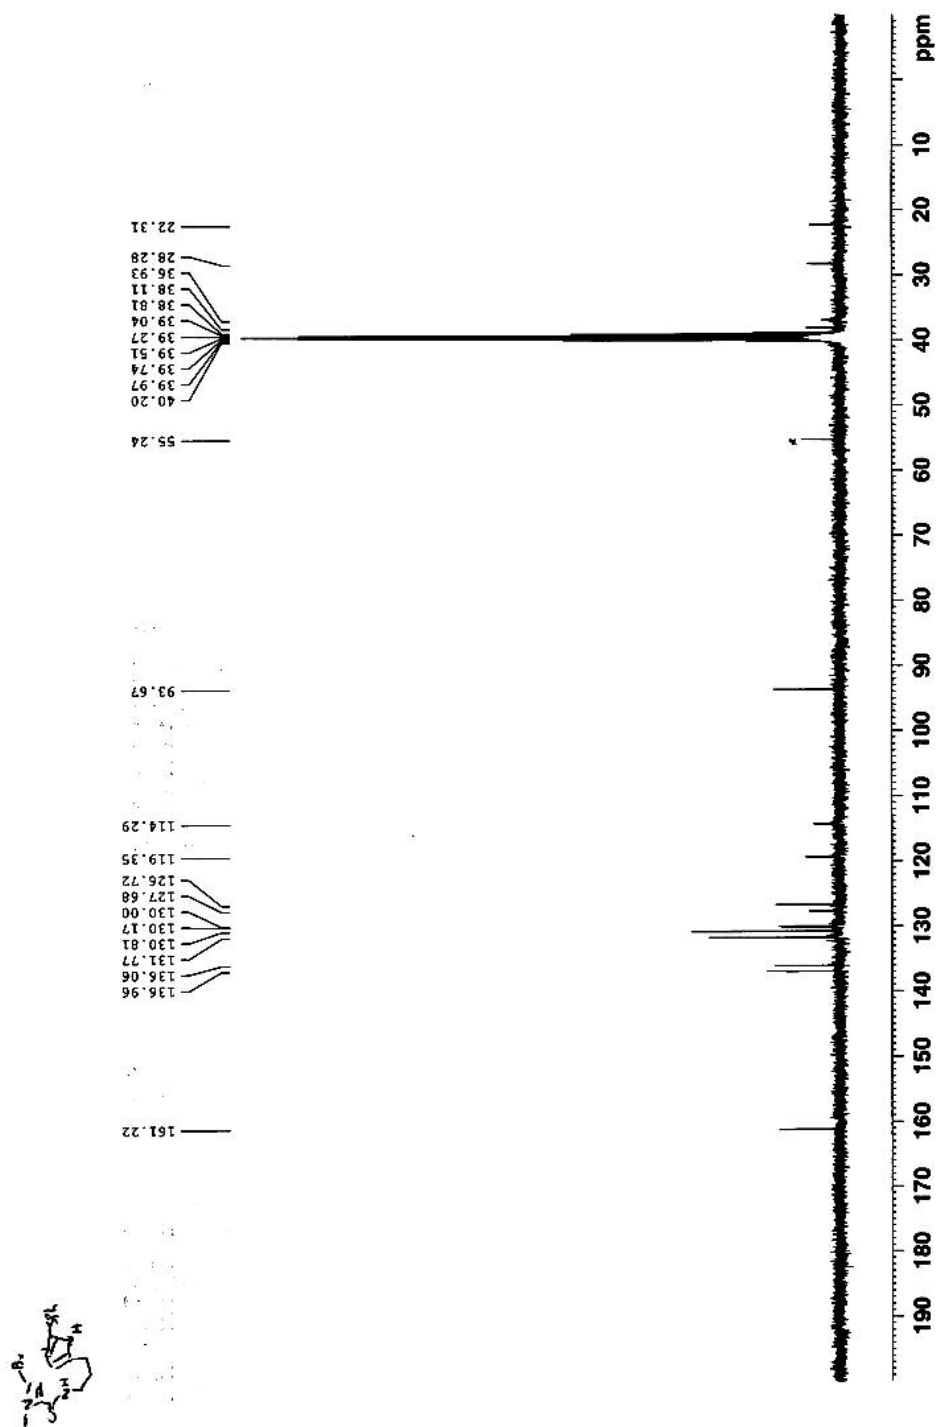

Current Data Parameters  
NAME md1-051707  
EXPNO 15  
PROCNO 1

F2 - Acquisition Parameters  
Date\_ 20070517  
Time 14:56  
INSTRUM spect  
PROBHD 5 mm Multinu  
PULPROG zg30  
TD 65536  
SOLVENT DMS  
NS 16  
DS 0  
SWH 6172.839 Hz  
FIDRES 0.376760 Hz  
AQ 1.3271540 sec  
RG 256  
DM 81.000 usec  
DE 5.00 usec  
TE 300.0 K  
D1 1.0000000 sec

\*\*\*\*\* CHANNEL f1 \*\*\*\*\*  
NUC1 1H  
P1 9.60 usec  
PL1 -6.00 dB  
SF01 300.1318534 MHz

F2 - Processing parameters  
SI 32768  
SF 300.1300051 MHz  
WDW no  
SSB 0  
LB 0.00 Hz  
GB 0  
PC 1.00

1D NMR plot parameters  
CX 20.00 cm  
F1P 12.000 ppm  
F1 3601.56 Hz  
F2P -2.000 ppm  
F2 -600.26 Hz  
PPMCM 0.70000 ppm/cm  
HZCM 210.09100 Hz/cm

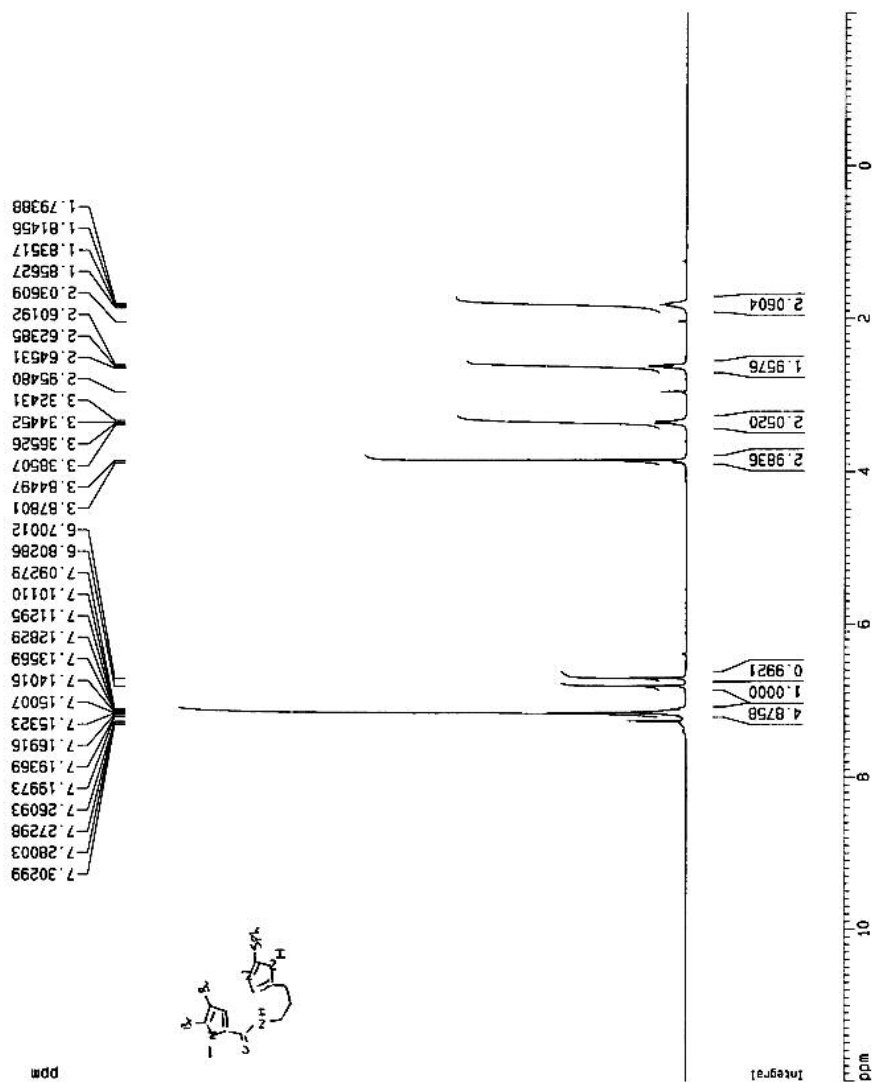

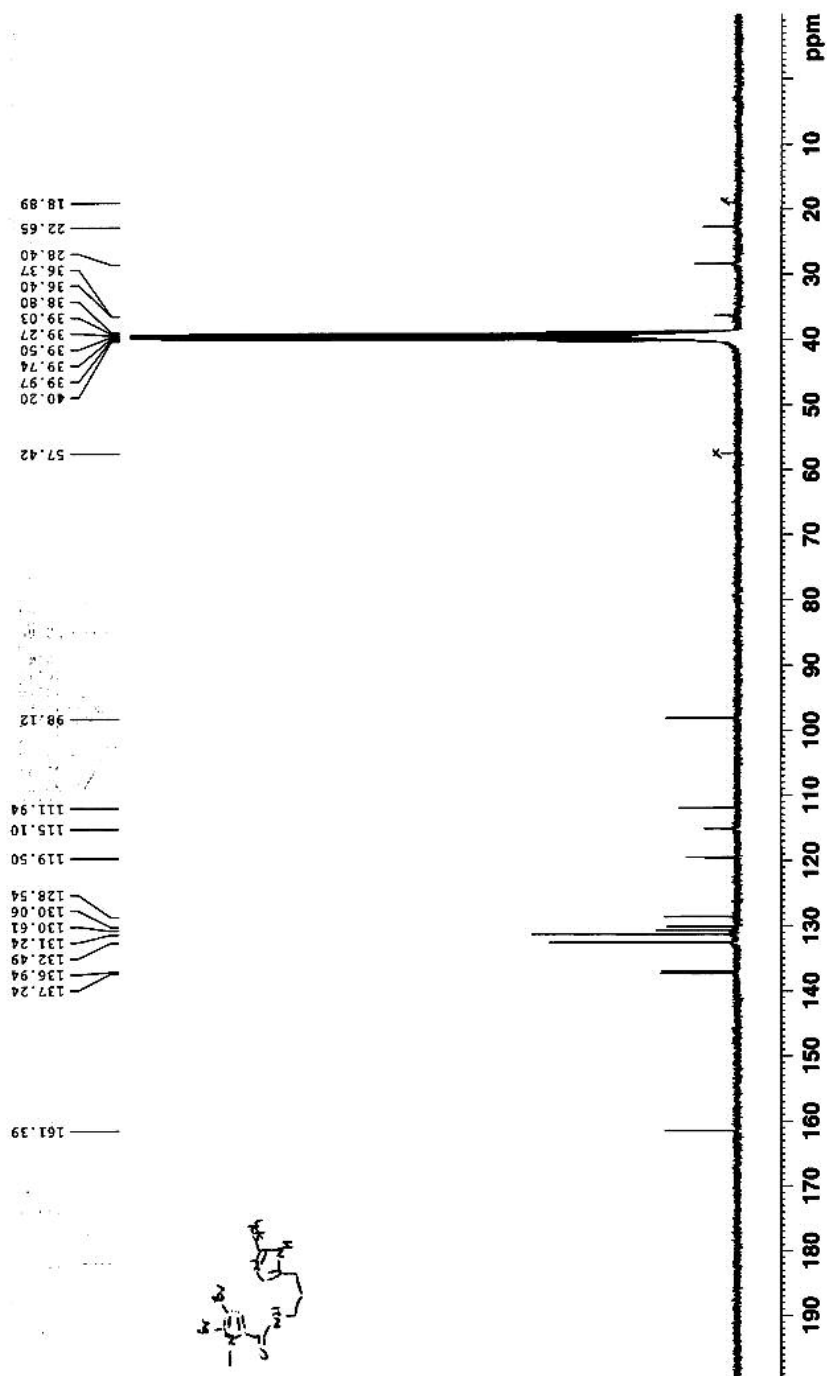

Current Data Parameters  
 NAME mdf-051907  
 EXPNO 6  
 PROCNO 1

F2 - Acquisition Parameters

Date\_ 20070519  
 Time 20:37  
 INSTRUM spect  
 PROBHD 5 mm BBI 1H-6  
 PULPROG zgpg30  
 TO 16384  
 SOLVENT CDCl3  
 NS 32  
 DS 0  
 SWH 8278.146 Hz  
 FIDRES 0.505208 Hz  
 AQ 0.9896436 sec  
 RG 143.7  
 DM 60.400 usec  
 DE 6.00 usec  
 TE 300.0 K  
 D1 1.0000000 sec

===== CHANNEL f1 =====

NUC1 1H  
 P1 6.45 usec  
 PL1 0.00 dB  
 SF01 400.1324710 MHz

F2 - Processing parameters

SI 32768  
 SF 400.1300072 MHz  
 WDW no  
 SSB 0  
 LB 0.00 Hz  
 GB 0  
 PC 1.00

1D NMR plot parameters

CX 20.00 cm  
 F1P 11.000 ppm  
 F1 4401.43 Hz  
 F2P -1.000 ppm  
 F2 -480.13 Hz  
 PPM0H 0.80000 ppm/cm  
 MZCM 240.07800 Hz/cm

1.74433  
 1.75078  
 1.77711  
 2.53966  
 2.55652  
 2.57346  
 3.19666  
 3.21782  
 3.22761  
 3.23015  
 3.23559  
 3.27975  
 3.29501  
 3.31010  
 3.32499  
 5.51717  
 6.05435  
 6.06115  
 6.68293  
 6.68851  
 6.69213  
 6.75603  
 6.82560  
 6.82918  
 7.05416  
 7.06152  
 7.07499  
 7.07930  
 7.08301  
 7.10042  
 7.11653  
 7.13560  
 7.13860  
 7.15826  
 7.26095

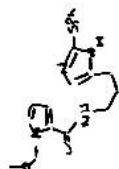

ppm

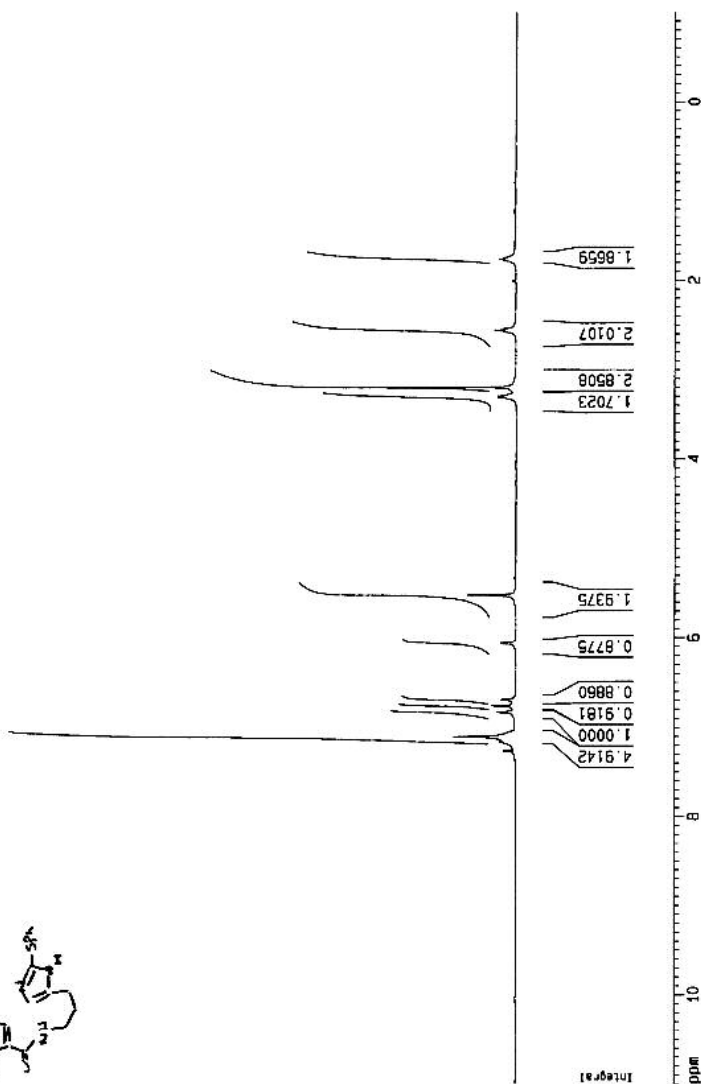

Current Data Parameters  
 NAME adf-052107  
 EXPNO 31  
 PROCNO 1

F2 - Acquisition Parameters  
 Date\_ 20070521  
 Time 19.14  
 INSTRUM spect  
 PROBHD 5 mm BBI 1H-8  
 PULPROG zgpg30  
 TO 65536  
 SOLVENT DMSO  
 NS 129  
 DS 4  
 SWH 25125.629 Hz  
 FIDRES 0.353387 Hz  
 AQ 1.3542184 sec  
 RG 65536  
 DB 15.800 usec  
 DE 6.00 usec  
 TE 300.0 K  
 T1 2.0000000 sec  
 d11 0.0300000 sec  
 d12 0.0005000 sec

===== CHANNEL f1 =====  
 NUC1 13C  
 P1 15.35 usec  
 PL1 -5.00 dB  
 SF01 100.6237659 MHz

===== CHANNEL f2 =====  
 CPOPRG2 waltz16  
 NUC2 1H  
 PPO2 114.00 usec  
 PL2 0.00 dB  
 PL12 24.00 dB  
 PL13 24.00 dB  
 SF02 400.1315005 MHz

F2 - Processing parameters  
 SI 32768  
 SF 100.6127205 MHz  
 NDM 64  
 SSB 0  
 LB 1.00 Hz  
 GB 0  
 PC 1.40

1D NMR plot parameters  
 CX 20.00 cm  
 F1P 200.000 ppm  
 F1 20122.54 Hz  
 F2P -10.000 ppm  
 F2 -1006.13 Hz  
 FWHM 10.300000 ppm/cg  
 NZCM 1056.43559 Hz/cm

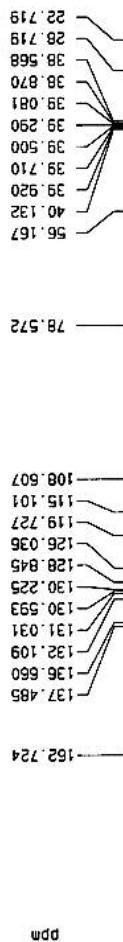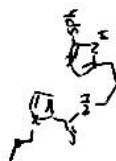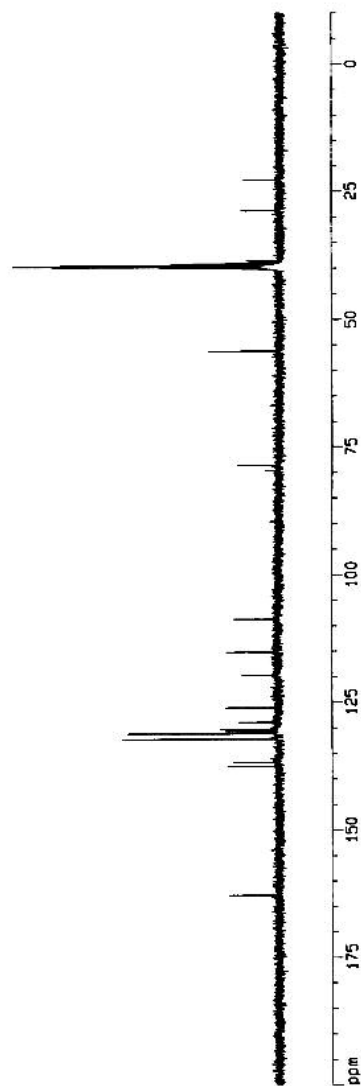



Current Data Parameters  
 NAME mdf-051907  
 EXPNO 1  
 PROCNO 1

F2 - Acquisition Parameters  
 Date\_ 20070519  
 Time 11:52  
 INSTRUM spect  
 PROBHD 5 mm BBI 1H-B  
 PULPROG zg30  
 TO 16384  
 SOLVENT CDCl3  
 NS 15  
 DS 0  
 SWH 8328.145 Hz  
 FIDRES 0.565258 Hz  
 AQ 0.9896436 sec  
 RG 512  
 DM 60.400 usec  
 DE 6.00 usec  
 TE 300.0 K  
 D1 1.0000000 sec

===== CHANNEL f1 =====  
 NUC1 1H  
 P1 5.45 usec  
 PL1 0.00 dB  
 SFO1 400.1324710 MHz

F2 - Processing parameters  
 SI 32768  
 SF 400.130067 MHz  
 MDW no  
 SSB 0  
 LB 0.00 Hz  
 GB 0  
 PC 1.00

1D NMR plot parameters  
 CX 20.00 cm  
 F1P 12.000 ppm  
 F1 4801.56 Hz  
 F2P -2.000 ppm  
 F2 -800.25 Hz  
 NUCLH 0.70000 ppm/cm  
 HZCM 280.05100 Hz/cm

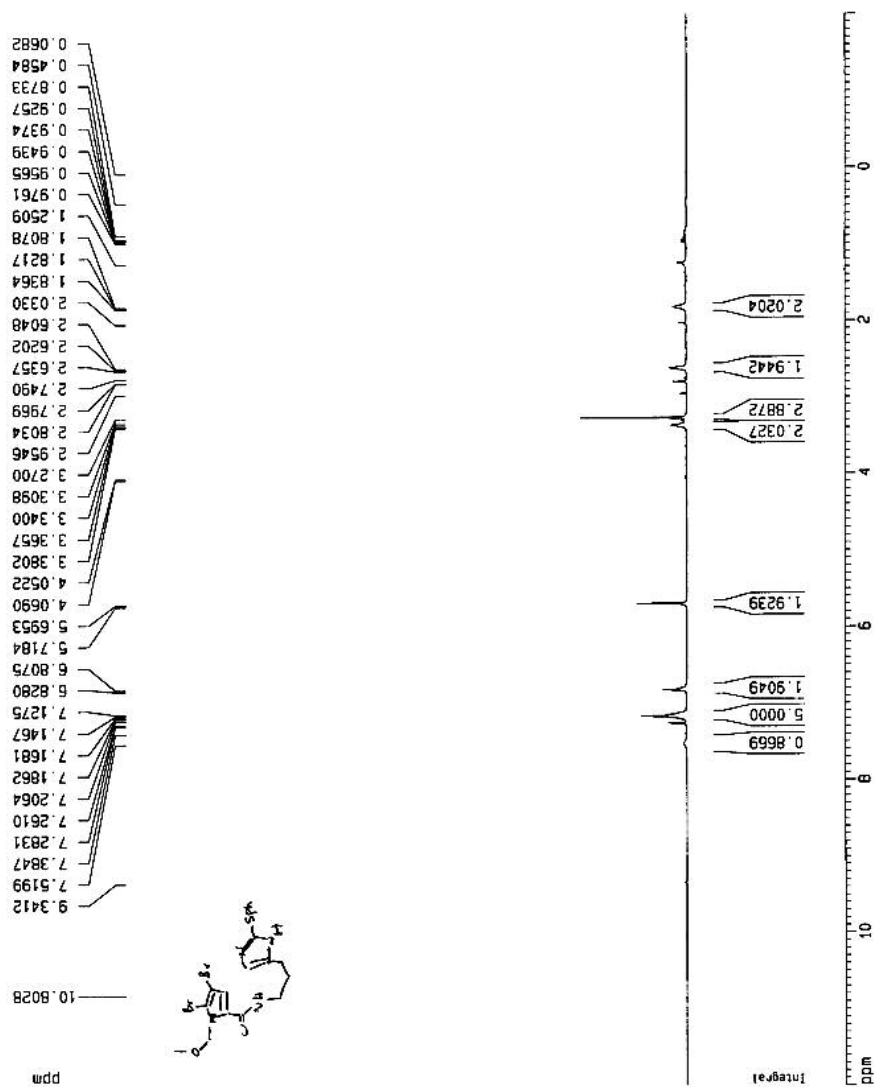

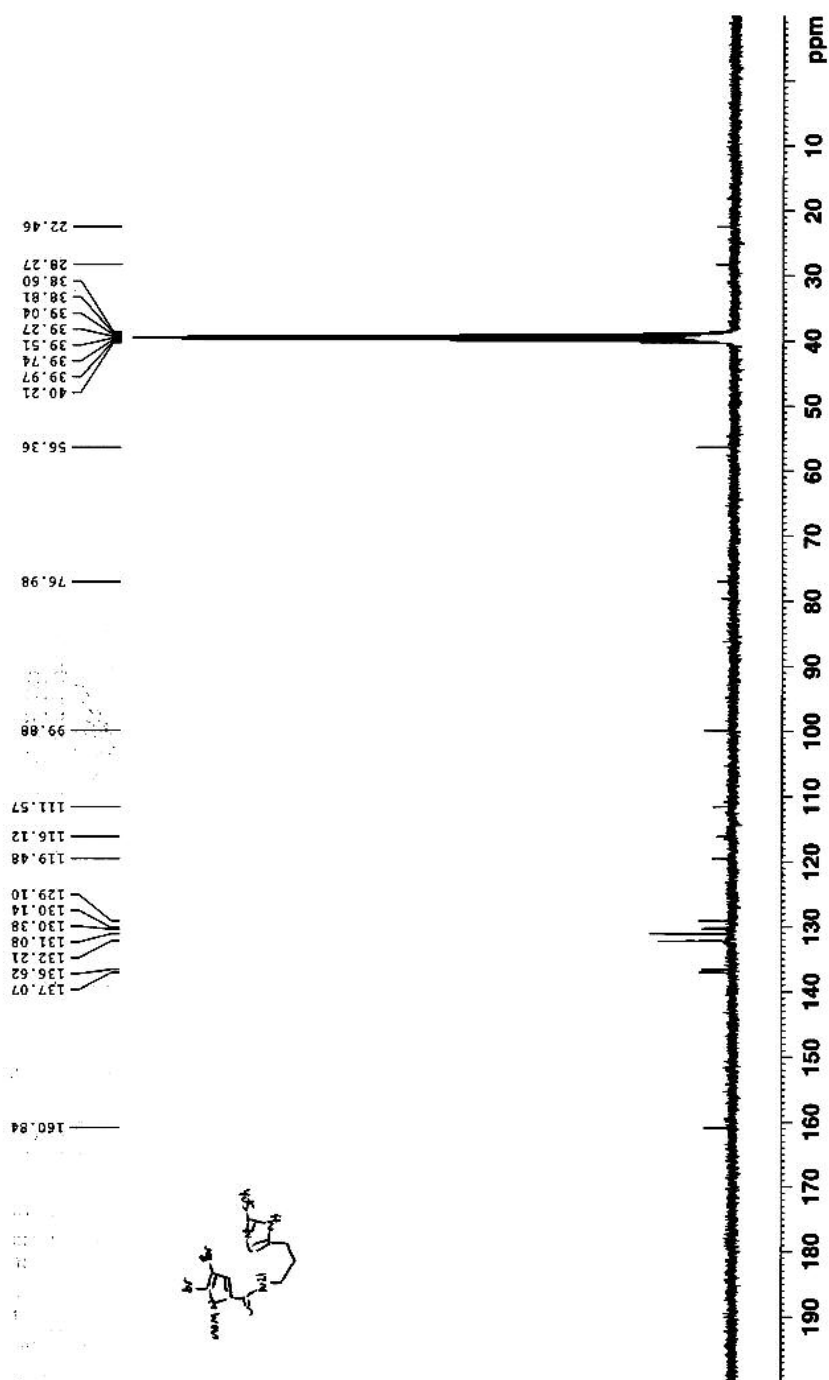

Current Data Parameters  
NAME mdf-051907  
EXPNO 7  
PROCNO 1

F2 - Acquisition Parameters  
Date\_ 20070519  
Time 20.46  
INSTRUM spect  
PROBHD 5 mm BBI 1H-5  
PULPROG zg30  
TD 16384  
SOLVENT DMS  
NS 32  
DS 2  
SWH 8278.146 Hz  
FIDRES 0.505236 Hz  
AQ 0.9895436 sec  
RG 161.3  
DM 60.400 usec  
DE 6.00 usec  
TE 300.0 K  
D1 1.0000000 sec

----- CHANNEL f1 -----  
NUC1 1H  
P1 6.45 usec  
PL1 0.00 dB  
SFO1 400.1324710 MHz

F2 - Processing parameters  
SI 32768  
SF 400.1300390 MHz  
WDW no  
SSB 0  
LB 0.00 Hz  
GB 0  
PC 1.00

1D NMR plot parameters  
CK 20.00 cm  
F1P 12.000 ppm  
F1 4801.55 Hz  
F2P -2.000 ppm  
F2 -800.26 Hz  
PRGCM 0.70030 ppm/cm  
HZCM 280.09100 Hz/cm

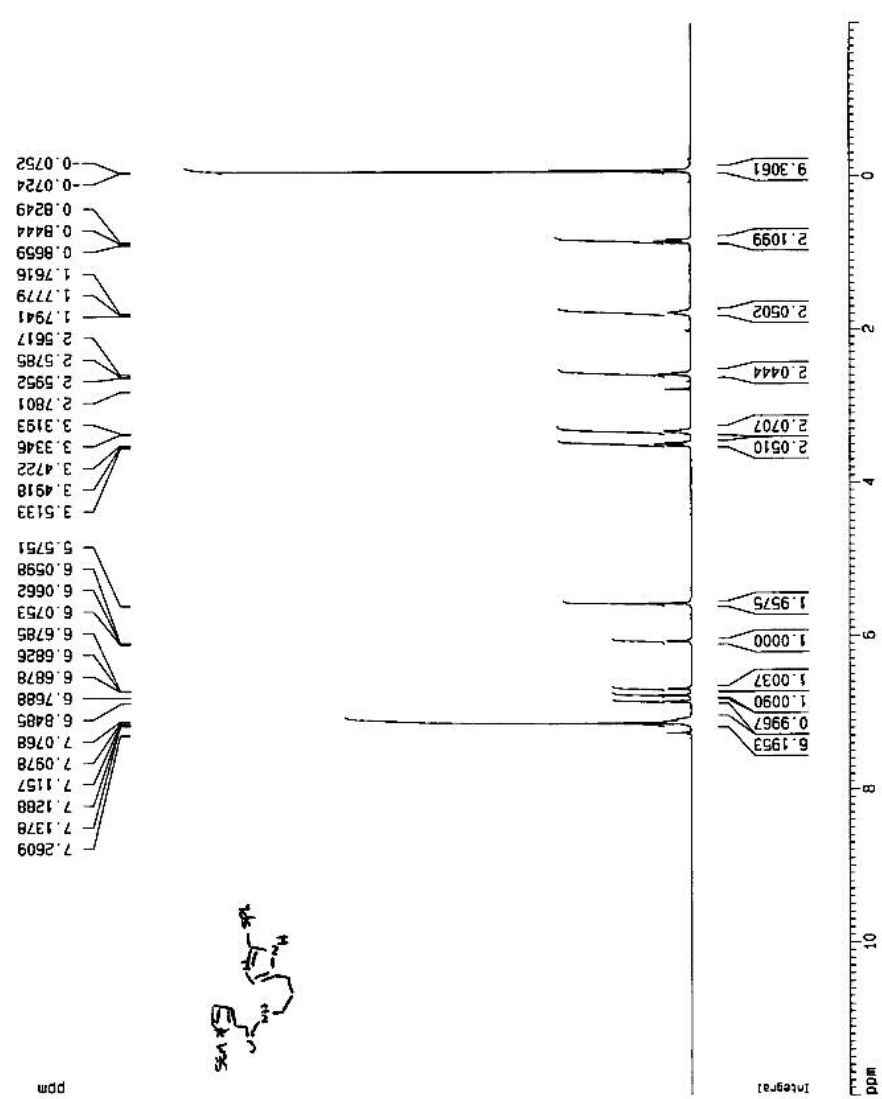

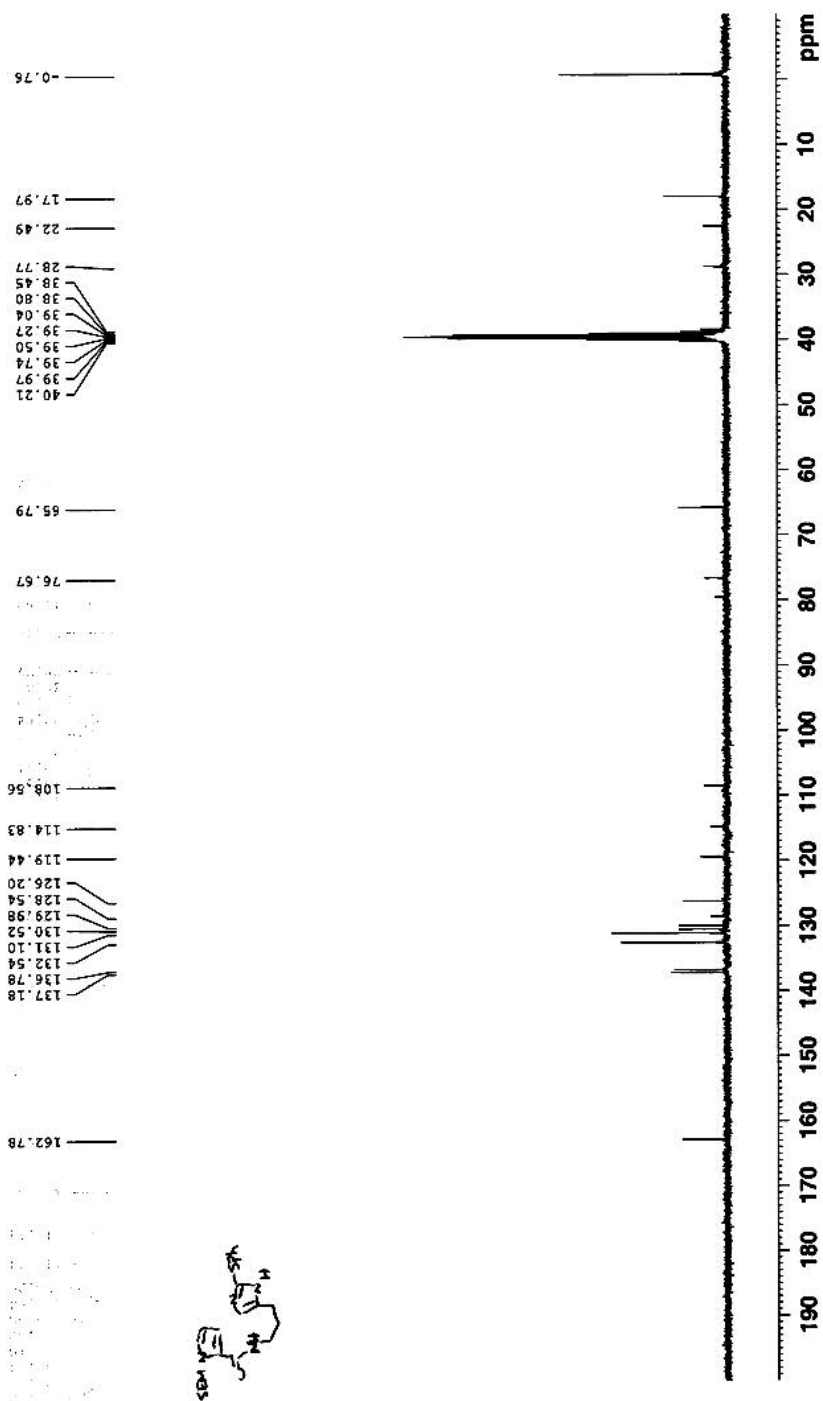

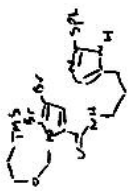

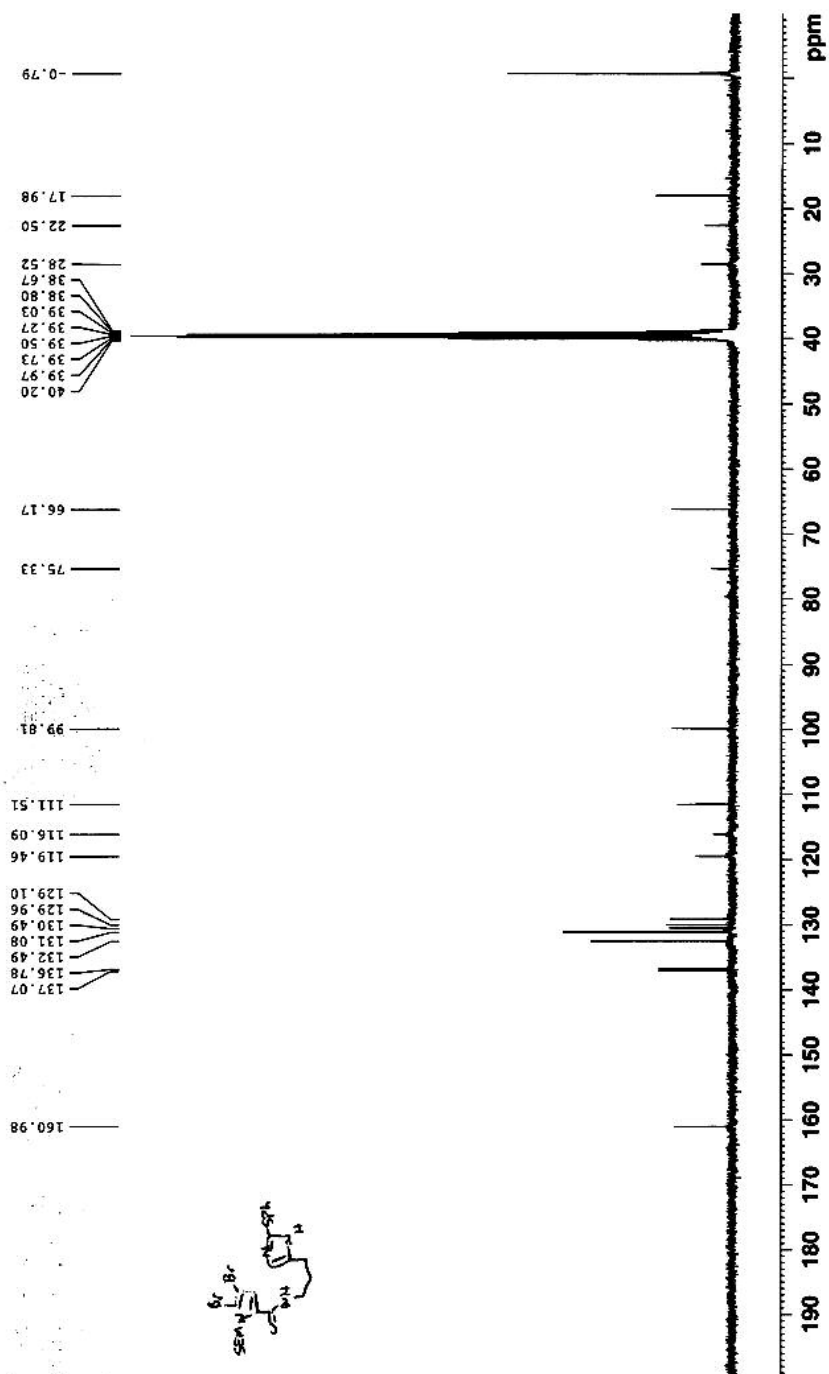

Current Data Parameters  
 NAME mdf-061607  
 EXPNO 2  
 PROCNO 1

F2 - Acquisition Parameters

Date\_ 20070615  
 Time 15:19  
 INSTRUM spect  
 PROCNO 5 mm Multinu  
 PULPROG zgpg30  
 TO 65536  
 SOLVENT DMSO  
 NS 16  
 DS 2  
 SNH 6172.839 Hz  
 FIDRES 0.094150 Hz  
 AQ 5.3084660 sec  
 RG 101.5  
 DM 81.000 usec  
 DE 6.00 usec  
 TE 300.0 K  
 D1 1.0000000 sec

\*\*\*\*\* CHANNEL f1 \*\*\*\*\*

NUC1 1H  
 P1 9.60 usec  
 PL 1 -5.00 dB  
 SF01 300.1310534 MHz

F2 - Processing parameters

SF 32768  
 SF 300.1300016 MHz  
 MDW no  
 SSB 0  
 LB 0.00 Hz  
 DB 0  
 PC 1.00

1D NMR plot parameters

CX 20.00 cm  
 FIP 14.000 ppm  
 F1 4201.82 Hz  
 F2 -1.000 ppm  
 PPMCH 0.75000 ppm/cm  
 HZCM 225.09750 Hz/cm

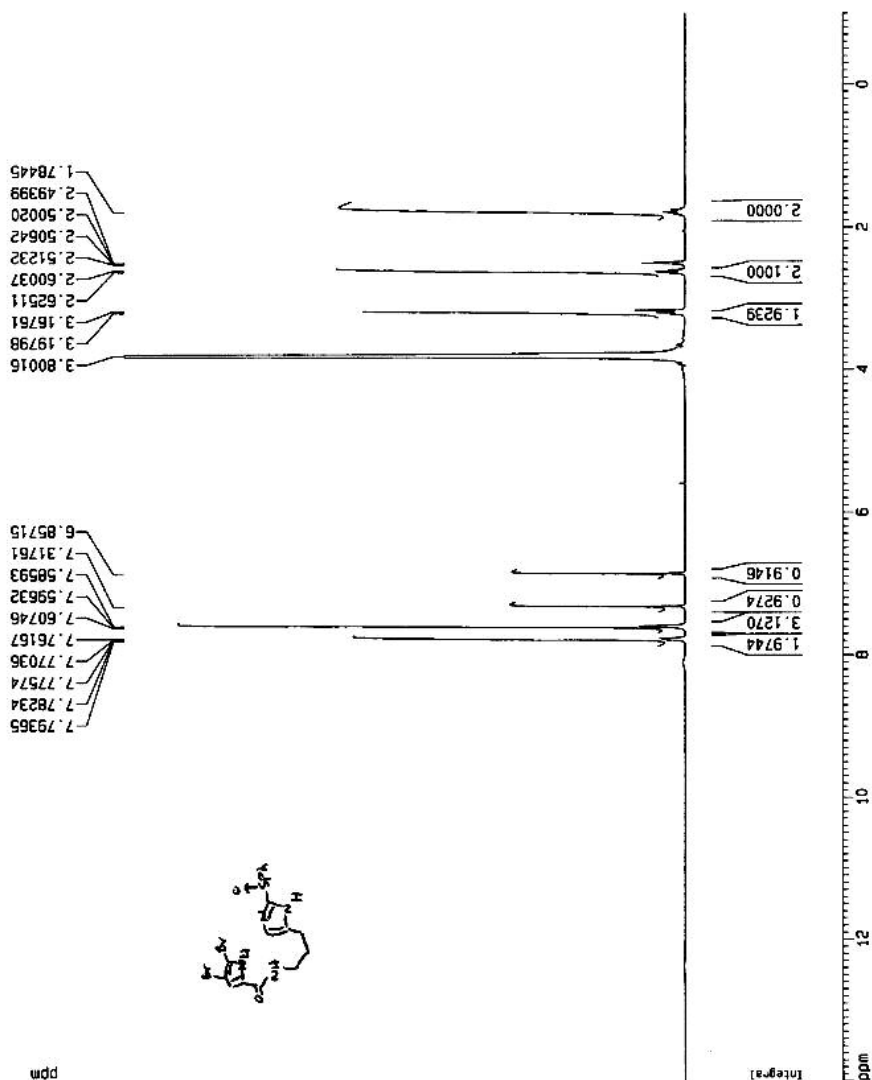

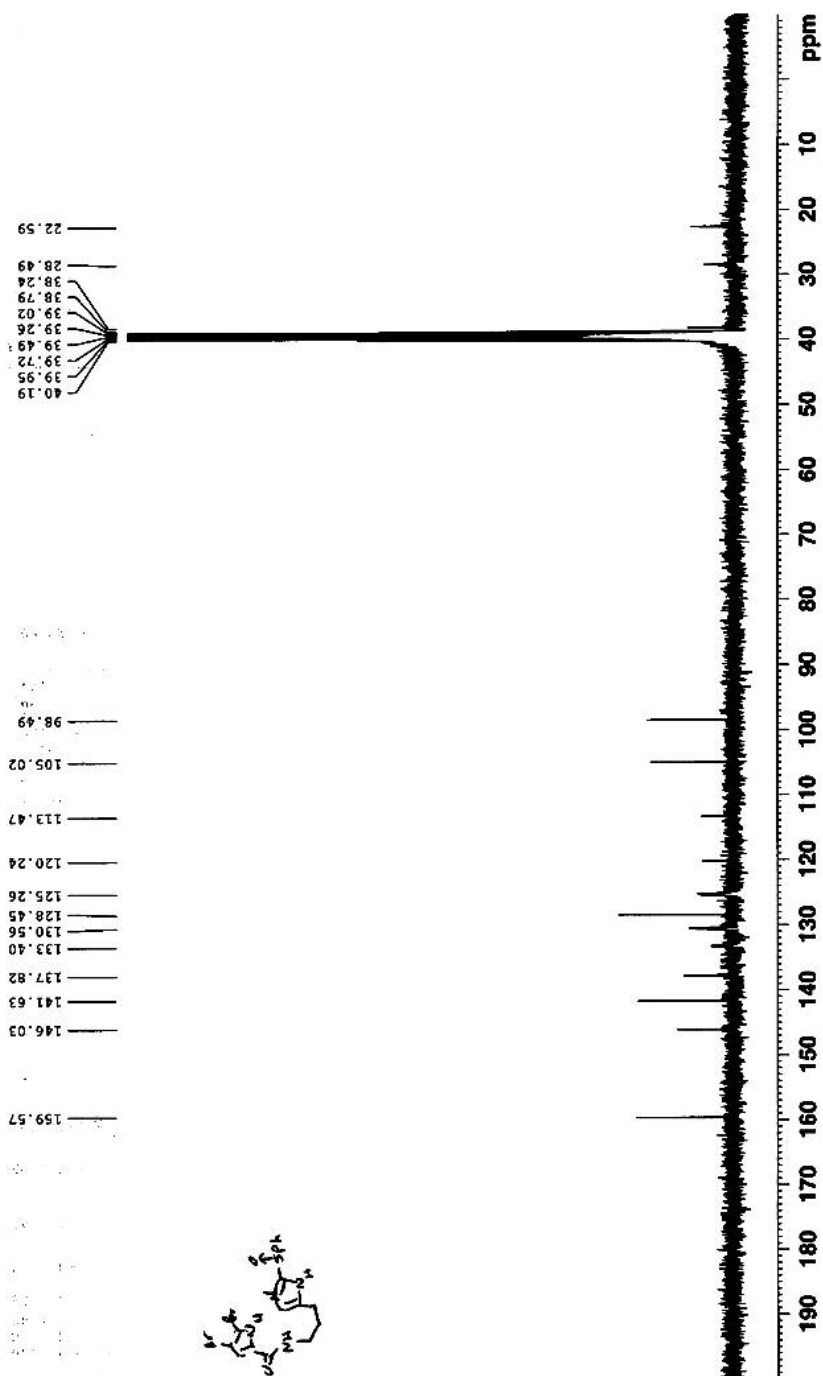



mlf-03-04s unknown product in DMSO - 400MHz

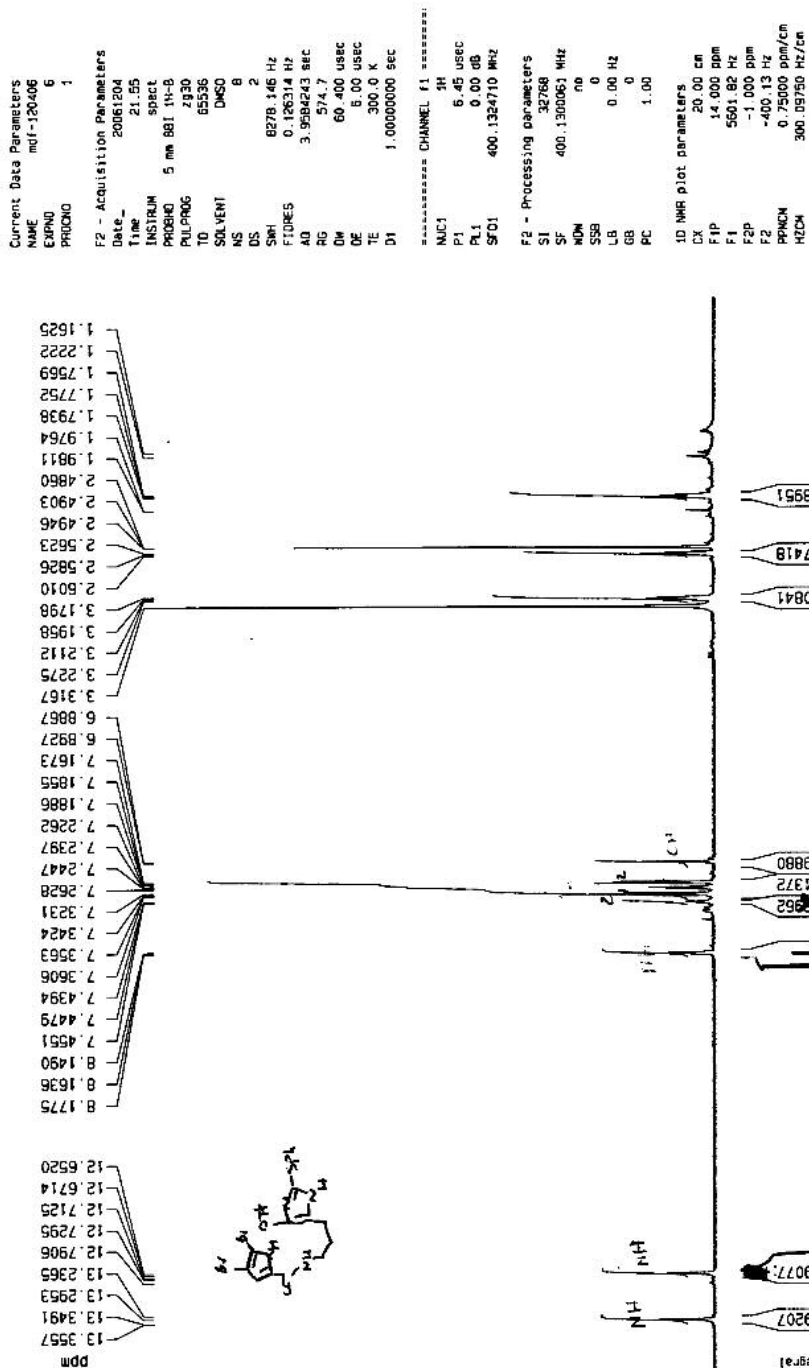

mdf-03-049 unknown product - 75MHz

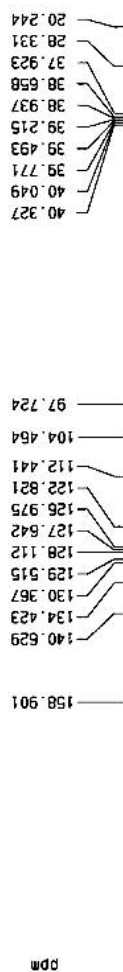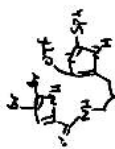

Current Data Parameters  
Name: mdf-03-049  
EXPNO: 6  
PROCNO: 1

F2 - Acquisition Parameters  
Date\_ : 20081204  
Time : 17.38  
INSTRUM : spect  
PROBHD : 5 mm WALT  
PULPROG : zgpg30  
TD : 65536  
SOLVENT : DMSO  
NS : 4096  
DS : 4  
SWH : 18832.393 Hz  
FIDRES : 0.287360 Hz  
AQ : 1.7400306 sec  
RG : 8192  
DM : 28.950 usec  
DE : 6.00 usec  
TE : 300.0 K  
D1 : 2.00000000 sec  
d11 : 0.03000000 sec  
d12 : 0.00020000 sec

===== CHANNEL f1 =====  
NUC1 : 13C  
P1 : 11.80 usec  
PL1 : 0.00 dB  
SFO1 : 75.476000 MHz

===== CHANNEL f2 =====  
CPDPRG2 : waltz16  
NUC2 : 1H  
PCPD2 : 110.00 usec  
PL2 : 0.00 dB  
PL12 : 17.50 dB  
PL13 : 17.50 dB  
SFO2 : 300.131000 MHz

F2 - Processing parameters  
SI : 32768  
SF : 75.467784 MHz  
WDW : EM  
SSB : 0  
LB : 1.00 Hz  
GB : 0  
PC : 1.40

10 MHz plot parameters  
CX : 20.00 cm  
FIP : 215.000 ppm  
F1 : 16225.58 Hz  
F2 : -5.000 ppm  
F2 : -377.34 Hz  
PRGM : 11.00000 ppm/cm  
HZCM : 630.16569 Hz/cm

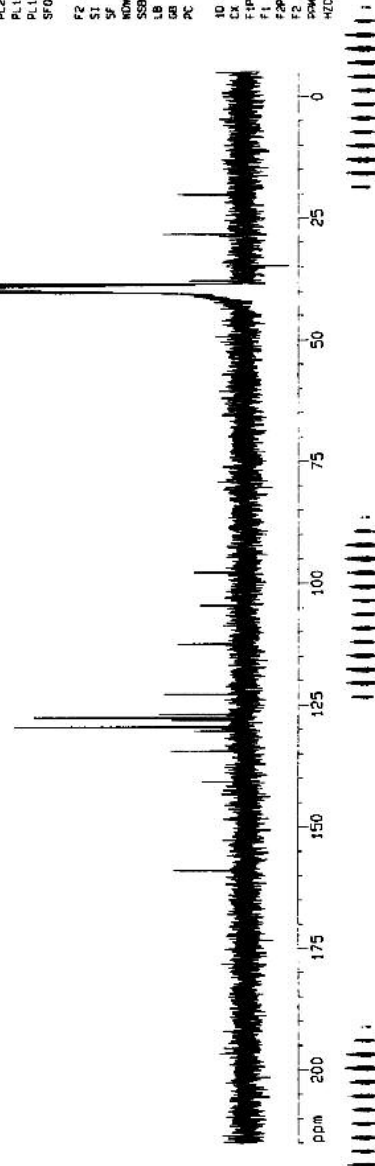

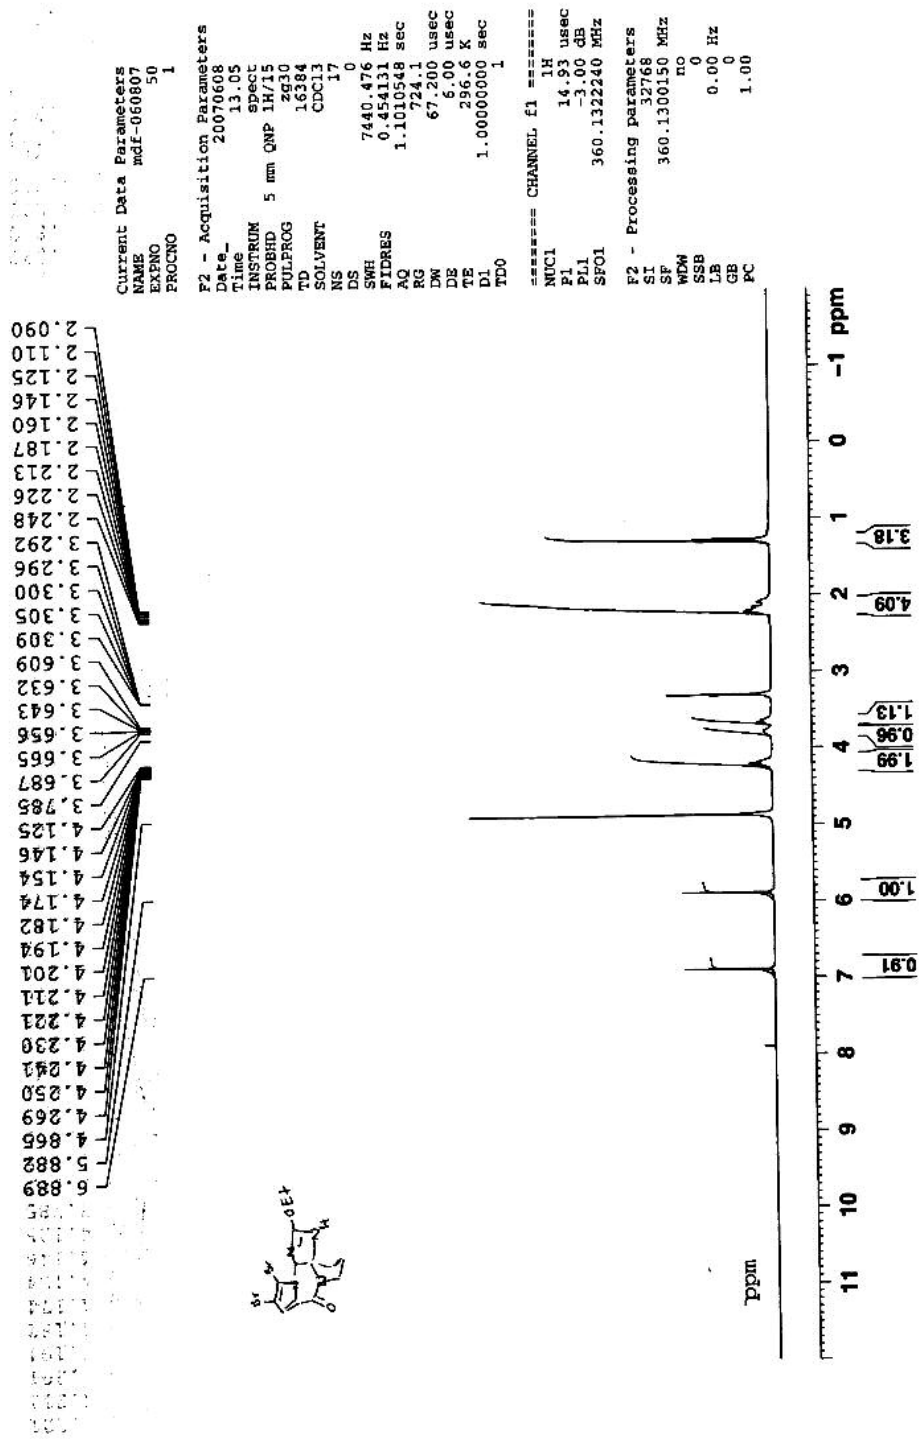

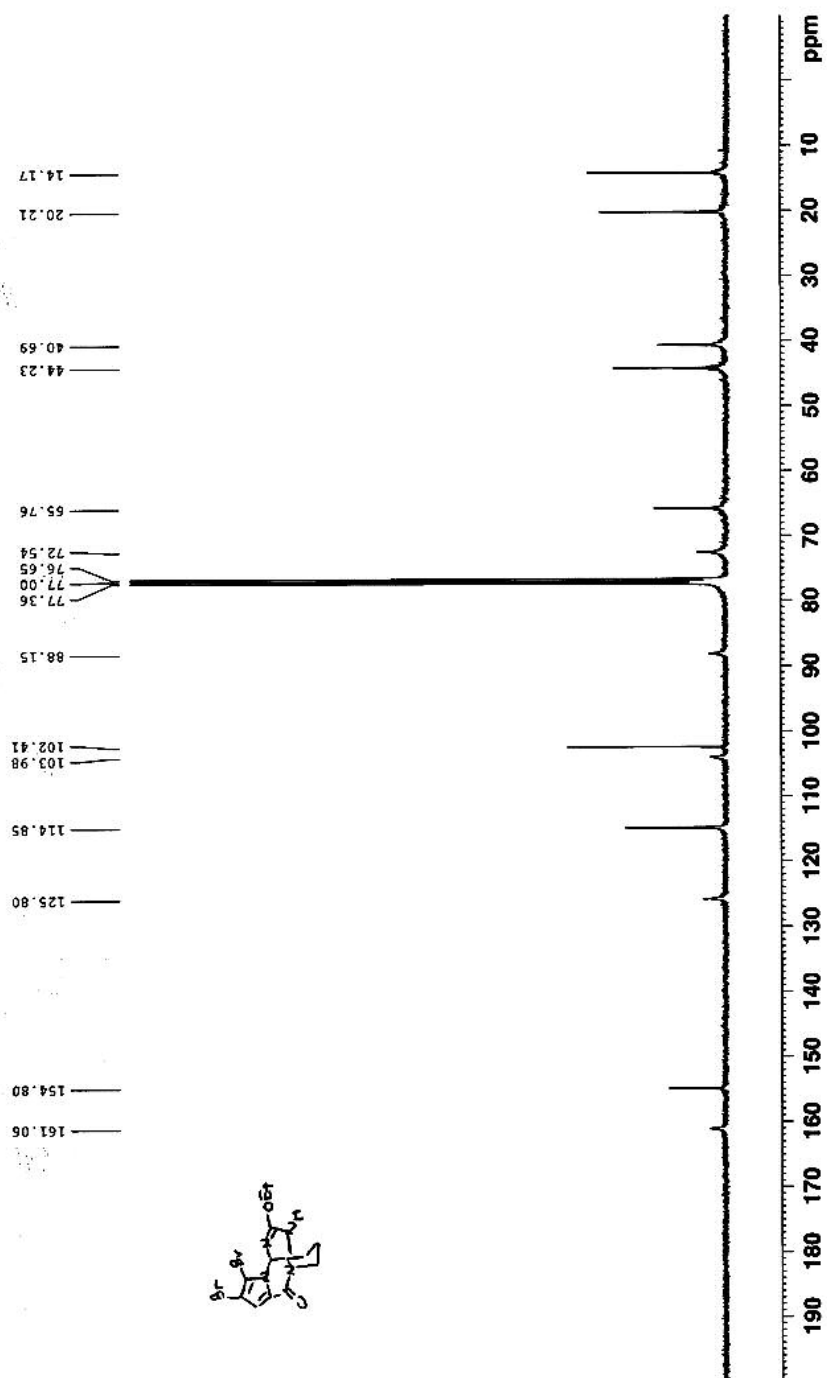

Current Data Parameters  
NAME md-062107  
EXPNO 11  
PROCNO 1

F2 - Acquisition Parameters  
Date\_ 20070621  
Time 20.01  
INSTRUM spect  
PROBHD 5 mm Multinu  
PULPROG zg30  
TD 16384  
SOLVENT MeOH  
NS 16  
DS 0  
SWH 5172.839 Hz  
FIDRES 0.376760 Hz  
AQ 1.3271540 sec  
RG 645.1  
DM 81.000 usec  
DE 6.00 usec  
TE 300.0 K  
D1 1.0000000 sec

\*\*\*\*\* CHANNEL f1 \*\*\*\*\*  
NUC1 1H  
P1 9.60 usec  
PL1 -6.00 dB  
SFO1 300.1318534 MHz

F2 - Processing parameters  
SI 32768  
SF 300.130078 MHz  
WDW no  
SSB 0  
LB 0.00 Hz  
GB 0  
PC 1.00

1D NMR plot parameters  
CX 20.00 cm  
F1P 10.000 ppm  
F1 3001.30 Hz  
F2P -1.000 ppm  
F2 -300.13 Hz  
PPhOH 0.55000 ppm/cm  
W2CN 165.07150 Hz/cm

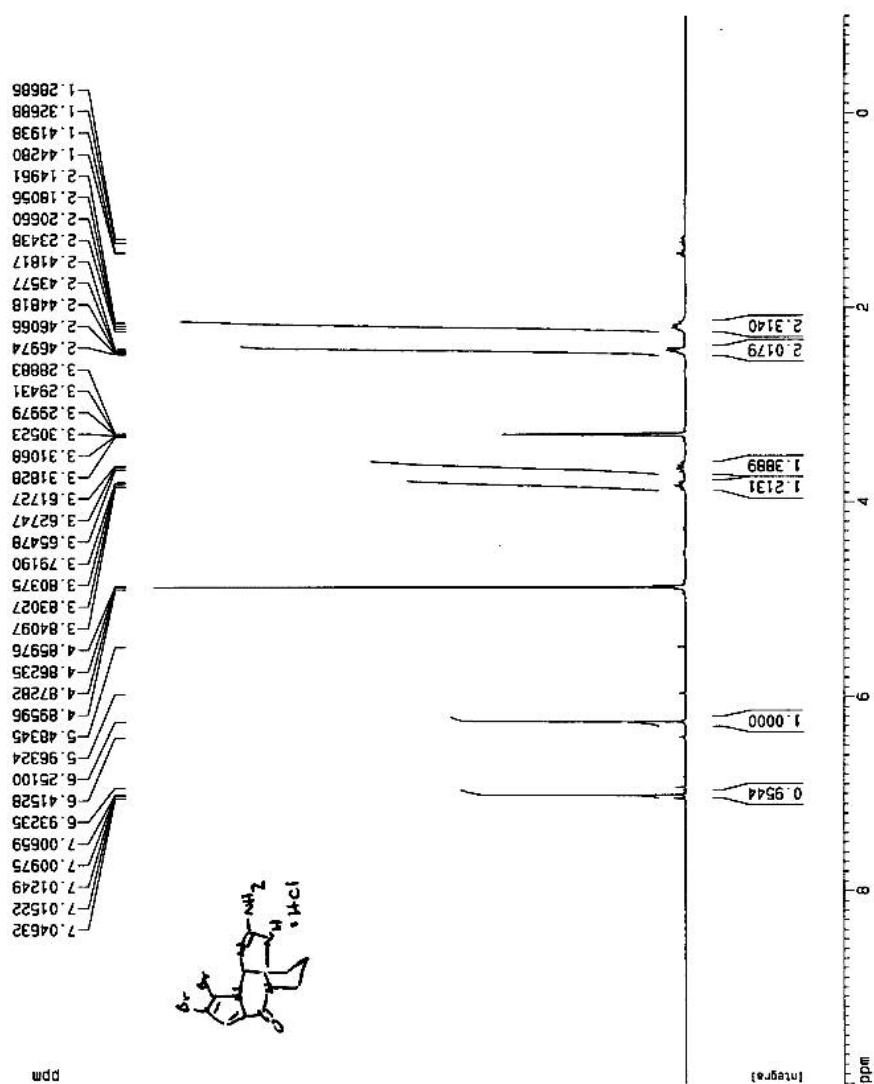

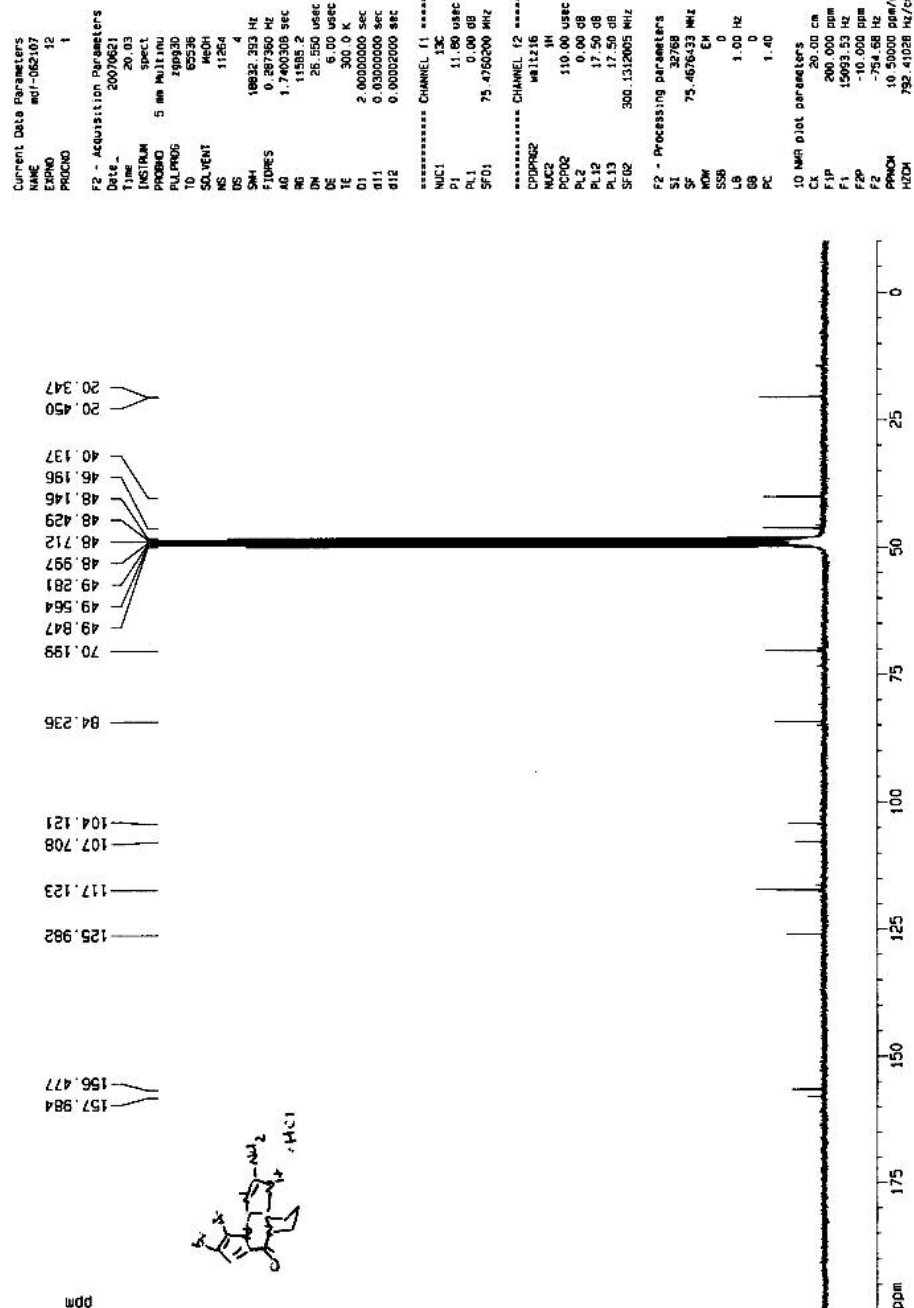

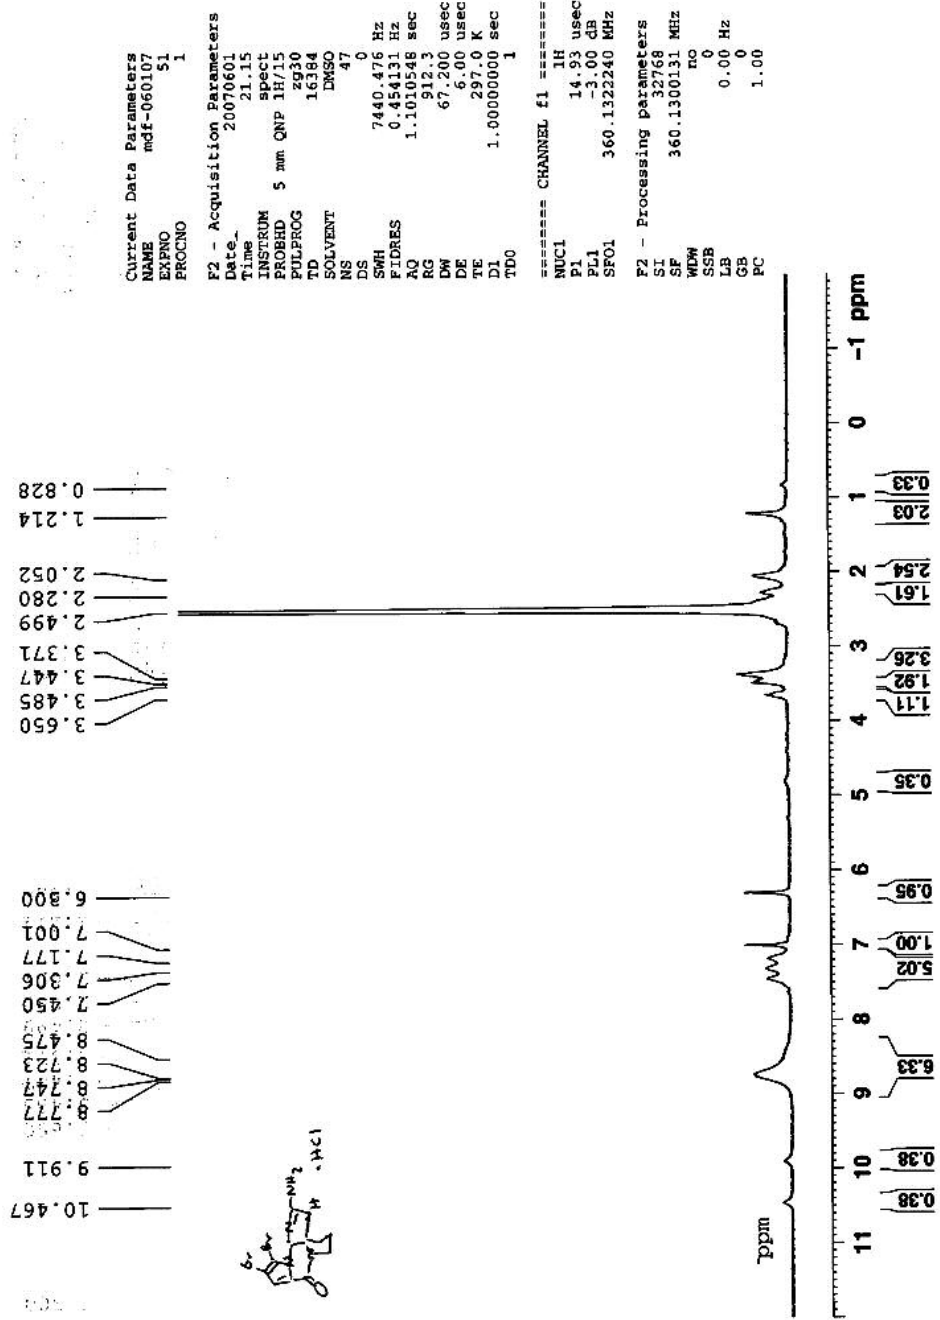

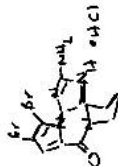



Moisture- and oxygen-sensitive reactions were carried out in flame-dried glassware under an inert nitrogen atmosphere. Dry acetonitrile, dichloromethane, methanol and triethylamine were obtained by passing these solvents through activated alumina columns. Reagents were purchased at the highest commercial quality and used without further purification, unless otherwise stated. Diisopropylethylamine and 2,6-lutidine were distilled immediately prior to use. Reactions were monitored by thin layer chromatography carried out on 0.25 mm E. Merck silica gel plates (60F-254) with UV visualization. Purification of products via flash chromatography<sup>14</sup> was performed with 40-63  $\mu\text{m}$  silica gel and the solvent system indicated. Melting points are uncorrected. Copies of  $^1\text{H}$  and  $^{13}\text{C}$  NMR spectra are supplied in the Supporting Information as proof of purity.

**General Procedure A: Phthalimide Hydrazinolysis.** A stirring solution of phthalimidoimidazole in ethanol (0.1 M) was heated to reflux and treated with anhydrous hydrazine (20 equiv). A white precipitate began to form after approximately 5 min and the reaction was held at this temperature until the volume of this precipitate appeared to remain constant (ca. 30 min). The reaction solution was cooled to room temperature and partitioned between  $\text{CH}_2\text{Cl}_2$  and  $\text{H}_2\text{O}$  (equal volumes). The aqueous layer was extracted once with  $\text{CH}_2\text{Cl}_2$  and the combined organic fractions were washed with  $\text{H}_2\text{O}$  and brine, dried with  $\text{Na}_2\text{SO}_4$ , and concentrated to give a yellow oil. Purification of this oil by flash column chromatography using 10-25%  $\text{MeOH}(\text{NH}_3)/\text{CH}_2\text{Cl}_2$  as the eluent provided the pure aminoimidazole.

**General Procedure B: Coupling of Trichloroacetyl Pyrrole Derivatives with Aminoimidazole Substrates.** A stirring solution of aminoimidazole in acetonitrile (0.1 M) was treated with  $\text{Na}_2\text{CO}_3$  (1 equiv) followed by addition of the corresponding acyl pyrrole (1 equiv). The resulting yellow solution was held at room temperature for 16 h. In cases where a solid precipitated, it was collected and rinsed with water (20 mL) and then with ether (50 mL) to yield an analytically pure product. In all other cases where no precipitate formed, the reaction mixture was concentrated in vacuo to yield a dark yellow oil. Purification of this oil by flash column chromatography using 10-100% EtOAc/hexanes as the eluent provided the pure carboxamide.

**General Procedure C: Imidazole Deprotection.** A stirring solution of carboxamide in THF (0.1 M) was heated to reflux. After 1 minute, 1.5 M HCl (4 equiv) was added and the reaction solution was held at reflux for 2 h after which time it was cooled to room temperature and poured into an ammonium hydroxide solution (an amount equal in volume to the HCl solution previously added). The resulting solution was partitioned between EtOAc (20 mL) and  $\text{H}_2\text{O}$  (10 mL) and the aqueous layer was extracted twice with EtOAc (2 x 20 mL). The organic fractions were combined, washed with brine (1 x 10 mL), dried with  $\text{Na}_2\text{SO}_4$  and concentrated to give a yellow oil. Purification of this oil by flash column chromatography using 10-100% EtOAc/hexanes as the eluent provided the pure deprotection product.

**General Procedure D: Pyrrole Protection.** A stirring solution of acyl pyrrole in DMF (0.3 M) was treated with NaH (1.1 equiv) and the resulting yellow solution was

held at room temperature until the evolution of gas had ceased (ca. 10 min) after which the corresponding protecting agent (1.2 equiv) was added. After 1 hour, the resulting solution was partitioned between Et<sub>2</sub>O (30 mL) and H<sub>2</sub>O (10 mL) and the aqueous layer was extracted with Et<sub>2</sub>O (3 x 10 mL). The combined organic fractions were washed with H<sub>3</sub>PO<sub>4</sub> (3 x 10 mL), NaHCO<sub>3</sub> (3 x 10 mL), dried with Na<sub>2</sub>SO<sub>4</sub>, and concentrated to give a dark yellow oil. Purification of this oil by filtration through a short pad of silica using hexanes as the eluent provided the protected pyrrole.
